# Supplementary material
Source: HighWire-hosted journal article supplement (https://erj.ersjournals.com/highwire/filestream/132077/field_highwire_adjunct_files/1/ERJ-02040-2015_Supplementary_Table_S1.pdf)
Supplement: ERJ-02040-2015_Supplementary_Table_S1.pdf [file ERJ-02040-2015_Supplementary_Table_S1.pdf]

Supplementary table S1. List of selected, genotyped SNPs and the association with lung cancer risk in the discovery cohort.

| Pathway             | Gene       | ID No.     | Alleles  | Location | SNP array | CR (%)           |                     | MAF   |          | HWE- <i>P</i><br>(Controls) | Models, <i>p</i> -values |                       |                        |                         |
|---------------------|------------|------------|----------|----------|-----------|------------------|---------------------|-------|----------|-----------------------------|--------------------------|-----------------------|------------------------|-------------------------|
|                     |            |            |          |          |           | Cases<br>(n=610) | Controls<br>(n=610) | Cases | Controls |                             | Global <sup>a</sup>      | Dominant <sup>b</sup> | Recessive <sup>b</sup> | Codominant <sup>b</sup> |
| Apoptosis<br>(n=96) | ABL1       | rs2987902  | A/T      | Promoter | Y         | 99               | 99                  | 0.05  | 0.05     | 0.24                        | 0.90                     | 0.93                  | 0.69                   | 0.87                    |
|                     |            | rs1064165  | C/T      | CDS      | N         | -                | -                   | -     | -        | -                           | -                        | -                     | -                      | -                       |
|                     | ACTB       | rs2693950  | G/T      | Promoter | N         | -                | -                   | -     | -        | -                           | -                        | -                     | -                      | -                       |
|                     |            | rs2966449  | A/G      | Promoter | Y         | 100              | 100                 | 0.22  | 0.22     | 0.28                        | 0.70                     | 0.81                  | 0.41                   | 0.52                    |
|                     | AKT1       | rs10138227 | C/T      | 5'UTR    | Y         | 95               | 97                  | 0.12  | 0.14     | 0.46                        | 0.47                     | 0.26                  | 0.80                   | 0.34                    |
|                     |            | rs1130214  | G/T      | 5'UTR    | Y         | 0                | 0                   | -     | -        | -                           | -                        | -                     | -                      | -                       |
|                     |            | rs28634999 | C/T      | Promoter | Y         | 84               | 93                  | 0.02  | 0.01     | 0.77                        | -                        | -                     | -                      | -                       |
|                     | B2M        | rs16966334 | C/G      | Promoter | Y         | 100              | 100                 | 0.14  | 0.14     | 0.85                        | 0.45                     | 0.70                  | 0.26                   | 0.96                    |
|                     |            | rs2255235  | G/T      | Promoter | Y         | 100              | 100                 | 0.08  | 0.09     | 0.45                        | 0.63                     | 0.40                  | 0.59                   | 0.48                    |
|                     | BAD        | rs2510066  | A/G      | Promoter | Y         | 0                | 0                   | -     | -        | -                           | -                        | -                     | -                      | -                       |
|                     |            | rs887314   | A/C      | Promoter | N         | -                | -                   | -     | -        | -                           | -                        | -                     | -                      | -                       |
|                     | BAG1       | rs16919130 | C/G      | Promoter | Y         | 100              | 100                 | 0.11  | 0.10     | 0.00                        | -                        | -                     | -                      | -                       |
|                     | BAG3       | rs3858340  | C/T      | CDS      | N         | -                | -                   | -     | -        | -                           | -                        | -                     | -                      | -                       |
|                     | BAG4       | rs17435276 | A/C      | Promoter | Y         | 100              | 100                 | 0.36  | 0.38     | 0.50                        | 0.68                     | 0.58                  | 0.62                   | 0.52                    |
|                     | BAK1       | rs5745568  | A/C      | Promoter | Y         | 100              | 100                 | 0.24  | 0.22     | 0.98                        | 0.48                     | 0.51                  | 0.34                   | 0.30                    |
|                     |            | rs2284829  | G/A      | Promoter | N         | -                | -                   | -     | -        | -                           | -                        | -                     | -                      | -                       |
|                     |            | rs511515   | A/G      | 3'UTR    | N         | -                | -                   | -     | -        | -                           | -                        | -                     | -                      | -                       |
|                     | BAX        | rs4645878  | G/A      | Promoter | N         | -                | -                   | -     | -        | -                           | -                        | -                     | -                      | -                       |
|                     | BCL2       | rs2279115  | C/A      | Promoter | N         | -                | -                   | -     | -        | -                           | -                        | -                     | -                      | -                       |
|                     | BCL10      | rs3768235  | A/G      | CDS      | Y         | 100              | 100                 | 0.14  | 0.16     | 0.33                        | 0.20                     | 0.25                  | 0.10                   | 0.07                    |
|                     |            | rs2735592  | A/C      | Promoter | N         | -                | -                   | -     | -        | -                           | -                        | -                     | -                      | -                       |
|                     |            | rs1060843  | C/G      | 5'UTR    | N         | -                | -                   | -     | -        | -                           | -                        | -                     | -                      | -                       |
|                     |            | rs2735593  | G/C      | 5'UTR    | N         | -                | -                   | -     | -        | -                           | -                        | -                     | -                      | -                       |
|                     |            | rs9887812  | C/T      | Promoter | N         | -                | -                   | -     | -        | -                           | -                        | -                     | -                      | -                       |
|                     |            | rs8026803  | T/C      | IVS      | Y         | 100              | 100                 | 0.46  | 0.48     | 0.49                        | 0.02                     | 0.01                  | 0.05                   | 0.005                   |
|                     | BCL2A1     | rs1896795  | C/T      | IVS      | Y         | 100              | 100                 | 0.27  | 0.29     | 0.80                        | 0.32                     | 0.34                  | 0.10                   | 0.09                    |
|                     |            | rs2562753  | T/A      | IVS      | N         | -                | -                   | -     | -        | -                           | -                        | -                     | -                      | -                       |
|                     |            | rs2562754  | C/T      | IVS      | Y         | 100              | 100                 | 0.34  | 0.38     | 0.61                        | 0.14                     | 0.15                  | 0.08                   | 0.05                    |
|                     |            | rs6495460  | T/C      | IVS      | Y         | 100              | 100                 | 0.26  | 0.31     | 0.71                        | 0.02                     | 0.03                  | 0.02                   | 0.01                    |
|                     |            | rs34080999 | C/A      | CDS      | N         | -                | -                   | -     | -        | -                           | -                        | -                     | -                      | -                       |
|                     |            | rs28403598 | C/T      | Promoter | Y         | 100              | 100                 | 0.32  | 0.31     | 0.74                        | 0.92                     | 0.66                  | 0.94                   | 0.71                    |
|                     | BCL2L2     | rs4982748  | C/T      | Promoter | N         | -                | -                   | -     | -        | -                           | -                        | -                     | -                      | -                       |
| rs2227308           |            | G/A        | 3'UTR    | N        | -         | -                | -                   | -     | -        | -                           | -                        | -                     | -                      |                         |
| BCL2L10             | rs2231292  | C/A        | CDS      | N        | -         | -                | -                   | -     | -        | -                           | -                        | -                     | -                      |                         |
|                     | rs4776003  | C/T        | 5'UTR    | N        | -         | -                | -                   | -     | -        | -                           | -                        | -                     | -                      |                         |
|                     | rs2304204  | A/G        | 5'UTR    | Y        | 0         | 0                | -                   | -     | -        | -                           | -                        | -                     | -                      |                         |
| BCL2L12             | rs2304206  | C/T        | 5'UTR    | Y        | 100       | 100              | 0.20                | 0.20  | 0.88     | 0.80                        | 0.63                     | 0.77                  | 0.76                   |                         |
|                     | rs34739574 | C/T        | Promoter | Y        | 90        | 95               | 0.00                | 0.00  | -        | -                           | -                        | -                     | -                      |                         |

|         |            |     |          |   |     |     |      |      |      |       |       |      |       |
|---------|------------|-----|----------|---|-----|-----|------|------|------|-------|-------|------|-------|
|         | rs2304205  | C/A | 5'UTR    | N | -   | -   | -    | -    | -    | -     | -     | -    | -     |
| BCL2L13 | rs11089197 | C/G | Promoter | Y | 100 | 100 | 0.10 | 0.09 | 0.17 | 0.45  | 0.41  | 0.49 | 0.67  |
| BCLAF1  | rs3757156  | C/T | Promoter | Y | 100 | 100 | 0.10 | 0.09 | 0.95 | 0.65  | 0.40  | 0.76 | 0.39  |
|         | rs1967445  | A/T | IVS      | N | -   | -   | -    | -    | -    | -     | -     | -    | -     |
| BFAR    | rs11546303 | G/T | CDS      | Y | 100 | 100 | 0.16 | 0.16 | 0.30 | 0.65  | 0.48  | 0.67 | 0.87  |
| BID     | rs386333   | A/G | Promoter | Y | 96  | 94  | 0.01 | 0.01 | 0.00 | -     | -     | -    | -     |
|         | rs4819464  | A/G | IVS      | Y | 88  | 89  | 0.00 | 0.00 | -    | -     | -     | -    | -     |
|         | rs8190256  | A/C | Promoter | Y | 99  | 100 | 0.10 | 0.15 | 0.83 | 0.003 | 0.004 | 0.04 | 0.002 |
|         | rs8190315  | A/G | CDS      | Y | 99  | 99  | 0.12 | 0.12 | 0.05 | 0.79  | 0.77  | 0.68 | 0.89  |
| BIK     | rs4988364  | C/A | Promoter | N | -   | -   | -    | -    | -    | -     | -     | -    | -     |
|         | rs4988366  | A/G | Promoter | Y | 100 | 100 | 0.07 | 0.07 | 0.43 | 0.68  | 0.94  | 0.35 | 0.91  |
|         | rs926328   | A/T | Promoter | N | -   | -   | -    | -    | -    | -     | -     | -    | -     |
|         | rs4988374  | C/A | Promoter | N | -   | -   | -    | -    | -    | -     | -     | -    | -     |
| BIRC4   | rs28382699 | C/T | Promoter | Y | 99  | 100 | 0.25 | 0.26 | 0.00 | -     | -     | -    | -     |
|         | rs2355676  | A/G | IVS      | Y | 0   | 0   | -    | -    | -    | -     | -     | -    | -     |
|         | rs5956583  | A/C | CDS      | Y | 100 | 100 | 0.06 | 0.06 | 0.00 | -     | -     | -    | -     |
|         | rs5958318  | C/T | Promoter | Y | 82  | 86  | 0.38 | 0.38 | 0.00 | -     | -     | -    | -     |
|         | rs28382740 | A/G | 3'UTR    | N | -   | -   | -    | -    | -    | -     | -     | -    | -     |
| BIRC5   | rs2071214  | A/G | CDS      | Y | 99  | 99  | 0.21 | 0.23 | 0.06 | 0.01  | 0.04  | 0.26 | 0.21  |
|         | rs3764383  | A/G | Promoter | Y | 100 | 100 | 0.21 | 0.22 | 0.58 | 0.84  | 0.58  | 0.71 | 0.75  |
|         | rs9904341  | G/G | 5'UTR    | N | -   | -   | -    | -    | -    | -     | -     | -    | -     |
|         | rs17878467 | C/T | Promoter | N | -   | -   | -    | -    | -    | -     | -     | -    | -     |
|         | rs2239680  | C/T | 3'UTR    | N | -   | -   | -    | -    | -    | -     | -     | -    | -     |
|         | rs8073903  | C/T | Promoter | N | -   | -   | -    | -    | -    | -     | -     | -    | -     |
| BIRC6   | rs2366894  | A/T | CDS      | N | -   | -   | -    | -    | -    | -     | -     | -    | -     |
| BIRC7   | rs3810465  | A/G | Promoter | N | -   | -   | -    | -    | -    | -     | -     | -    | -     |
|         | rs3810466  | C/G | Promoter | N | -   | -   | -    | -    | -    | -     | -     | -    | -     |
| BIRC8   | rs7260390  | A/T | 5'UTR    | N | -   | -   | -    | -    | -    | -     | -     | -    | -     |
|         | rs8109165  | G/A | CDS      | N | -   | -   | -    | -    | -    | -     | -     | -    | -     |
|         | rs34683072 | G/A | CDS      | N | -   | -   | -    | -    | -    | -     | -     | -    | -     |
|         | rs35700345 | C/T | CDS      | N | -   | -   | -    | -    | -    | -     | -     | -    | -     |
| BNIP1   | rs171725   | A/G | Promoter | Y | 100 | 99  | 0.20 | 0.16 | 0.53 | 0.05  | 0.02  | 0.15 | 0.01  |
|         | rs255307   | G/A | Promoter | N | -   | -   | -    | -    | -    | -     | -     | -    | -     |
|         | rs5745098  | A/G | Promoter | Y | 99  | 99  | 0.01 | 0.00 | 0.92 | -     | -     | -    | -     |
| BNIP2   | rs6151483  | C/T | IVS      | Y | 91  | 93  | 0.17 | 0.17 | 0.85 | -     | -     | -    | -     |
|         | rs755605   | A/C | Promoter | Y | 100 | 100 | 0.47 | 0.46 | 0.92 | 0.69  | 0.85  | 0.27 | 0.41  |
|         | rs2306359  | G/T | CDS      | N | -   | -   | -    | -    | -    | -     | -     | -    | -     |
|         | rs4533213  | C/T | IVS      | N | -   | -   | -    | -    | -    | -     | -     | -    | -     |
|         | rs3087328  | G/A | CDS      | N | -   | -   | -    | -    | -    | -     | -     | -    | -     |
|         | rs754641   | A/G | CDS      | N | -   | -   | -    | -    | -    | -     | -     | -    | -     |
|         | rs754642   | C/T | Promoter | N | -   | -   | -    | -    | -    | -     | -     | -    | -     |
| BNIP3L  | rs9644114  | A/G | IVS      | Y | 100 | 100 | 0.14 | 0.15 | 0.41 | 0.05  | 0.92  | 0.02 | 0.47  |







|          |            |     |          |   |     |     |      |      |      |      |      |      |      |   |
|----------|------------|-----|----------|---|-----|-----|------|------|------|------|------|------|------|---|
|          | rs4870     | T/C | CDS      | N | -   | -   | -    | -    | -    | -    | -    | -    | -    | - |
|          | rs8725     | G/A | 3'UTR    | N | -   | -   | -    | -    | -    | -    | -    | -    | -    | - |
|          | rs2227312  | A/C | Promoter | N | -   | -   | -    | -    | -    | -    | -    | -    | -    | - |
|          | rs2227313  | G/A | Promoter | N | -   | -   | -    | -    | -    | -    | -    | -    | -    | - |
| TNFRSF19 | rs3751361  | C/T | 3'UTR    | Y | 100 | 100 | 0.20 | 0.20 | 0.53 | 0.56 | 0.76 | 0.38 | 0.96 |   |
|          | rs3829942  | A/G | Promoter | Y | 99  | 96  | 0.00 | 0.00 | -    | -    | -    | -    | -    |   |
|          | rs9550987  | A/T | CDS      | Y | 100 | 99  | 0.30 | 0.33 | 0.38 | 0.30 | 0.27 | 0.33 | 0.21 |   |
|          | rs3751362  | G/A | CDS      | N | -   | -   | -    | -    | -    | -    | -    | -    | -    |   |
| TNFRSF21 | rs6458555  | A/G | 5'UTR    | Y | 98  | 98  | 0.35 | 0.35 | 0.23 | 0.08 | 0.24 | 0.13 | 0.88 |   |
|          | rs6458556  | A/G | Promoter | N | -   | -   | -    | -    | -    | -    | -    | -    | -    |   |
| TNFRSF25 | rs3176900  | C/T | Promoter | Y | 93  | 94  | 0.01 | 0.01 | 0.80 | -    | -    | -    | -    |   |
|          | rs3007418  | G/A | 3'UTR    | N | -   | -   | -    | -    | -    | -    | -    | -    | -    |   |
| TNFSF8   | rs2075533  | G/A | Promoter | N | -   | -   | -    | -    | -    | -    | -    | -    | -    |   |
|          | rs3181348  | G/A | Promoter | N | -   | -   | -    | -    | -    | -    | -    | -    | -    |   |
|          | rs1555456  | C/G | Promoter | N | -   | -   | -    | -    | -    | -    | -    | -    | -    |   |
|          | rs3181356  | G/A | Promoter | N | -   | -   | -    | -    | -    | -    | -    | -    | -    |   |
| TNFSF9   | rs2234182  | C/T | 3'UTR    | N | -   | -   | -    | -    | -    | -    | -    | -    | -    |   |
| TNFSF10  | rs3136584  | A/C | Promoter | Y | 92  | 95  | 0.02 | 0.03 | 0.52 | -    | -    | -    | -    |   |
|          | rs12488654 | G/A | Promoter | N | -   | -   | -    | -    | -    | -    | -    | -    | -    |   |
|          | rs3136586  | T/C | Promoter | N | -   | -   | -    | -    | -    | -    | -    | -    | -    |   |
|          | rs388515   | G/A | Promoter | N | -   | -   | -    | -    | -    | -    | -    | -    | -    |   |
|          | rs432821   | T/C | Promoter | N | -   | -   | -    | -    | -    | -    | -    | -    | -    |   |
| TNFSF14  | rs11878563 | A/G | Promoter | Y | 100 | 100 | 0.45 | 0.48 | 0.05 | 0.42 | 0.34 | 0.28 | 0.21 |   |
|          | rs344560   | T/C | CDS      | N | -   | -   | -    | -    | -    | -    | -    | -    | -    |   |
|          | rs3760746  | C/T | 5'UTR    | Y | 100 | 100 | 0.45 | 0.48 | 0.04 | -    | -    | -    | -    |   |
|          | rs8106574  | C/T | Promoter | N | -   | -   | -    | -    | -    | -    | -    | -    | -    |   |
| TP53     | rs2287499  | C/G | Promoter | N | -   | -   | -    | -    | -    | -    | -    | -    | -    |   |
|          | rs1042522  | C/G | Promoter | N | -   | -   | -    | -    | -    | -    | -    | -    | -    |   |
| TP53BP2  | None       | -   | -        | - | -   | -   | -    | -    | -    | -    | -    | -    | -    |   |
| TP73     | rs9662633  | G/A | 3'UTR    | N | -   | -   | -    | -    | -    | -    | -    | -    | -    |   |
|          | rs2273953  | G/A | 5'UTR    | N | -   | -   | -    | -    | -    | -    | -    | -    | -    |   |
|          | rs1801173  | C/T | 5'UTR    | N | -   | -   | -    | -    | -    | -    | -    | -    | -    |   |
| TP63     | rs7631358  | G/A | Promoter | Y | 81  | 90  | 0.47 | 0.43 | 0.83 | -    | -    | -    | -    |   |
| TRADD    | rs3181263  | G/A | Promoter | N | -   | -   | -    | -    | -    | -    | -    | -    | -    |   |
| TRAF1    | rs2301334  | G/T | 5'UTR    | Y | 93  | 91  | 0.22 | 0.22 | 0.00 | -    | -    | -    | -    |   |
|          | rs3761846  | C/A | IVS      | N | -   | -   | -    | -    | -    | -    | -    | -    | -    |   |
|          | rs2416806  | C/G | IVS      | N | -   | -   | -    | -    | -    | -    | -    | -    | -    |   |
| TRAF2    | rs17250001 | A/C | Promoter | Y | 0   | 0   | -    | -    | -    | -    | -    | -    | -    |   |
|          | rs7852970  | G/A | 3'UTR    | N | -   | -   | -    | -    | -    | -    | -    | -    | -    |   |
|          | rs10747039 | G/A | Promoter | N | -   | -   | -    | -    | -    | -    | -    | -    | -    |   |
|          | rs2784075  | A/G | IVS      | N | -   | -   | -    | -    | -    | -    | -    | -    | -    |   |
| TRAF3    | rs1131877  | A/G | CDS      | Y | 100 | 100 | 0.47 | 0.46 | 0.97 | 0.94 | 0.82 | 0.90 | 0.94 |   |

Angiogenesis  
(n=86)

|         |            |     |          |   |     |     |      |      |      |      |      |      |      |   |
|---------|------------|-----|----------|---|-----|-----|------|------|------|------|------|------|------|---|
|         | rs2075771  | C/T | Promoter | N | -   | -   | -    | -    | -    | -    | -    | -    | -    | - |
| TRAF4   | None       | -   | -        | - | -   | -   | -    | -    | -    | -    | -    | -    | -    | - |
| TRAF5   | rs2271458  | A/C | CDS      | Y | 100 | 100 | 0.04 | 0.03 | 0.00 | -    | -    | -    | -    | - |
| AGGF1   | rs17682661 | C/T | Promoter | Y | 100 | 100 | 0.24 | 0.28 | 0.55 | 0.13 | 0.07 | 0.19 | 0.07 |   |
|         | rs34400049 | A/C | CDS      | Y | 99  | 100 | 0.24 | 0.27 | 0.42 | 0.10 | 0.06 | 0.15 | 0.06 |   |
| ANG     | rs17516133 | G/C | Promoter | N | -   | -   | -    | -    | -    | -    | -    | -    | -    | - |
| ANGPT1  | rs34145387 | A/T | Promoter | Y | 98  | 99  | 0.42 | 0.43 | 0.46 | 0.79 | 0.71 | 0.61 | 0.89 |   |
| ANGPT2  | rs2515507  | C/T | Promoter | Y | 99  | 96  | 0.07 | 0.09 | 0.69 | 0.04 | 0.29 | 0.98 | 0.18 |   |
|         | rs3739390  | C/G | 5'UTR    | Y | 100 | 100 | 0.08 | 0.10 | 0.16 | 0.13 | 0.14 | 0.16 | 0.09 |   |
|         | rs3739391  | A/G | 5'UTR    | N | -   | -   | -    | -    | -    | -    | -    | -    | -    | - |
| ANGPTL3 | rs11207997 | C/T | Promoter | Y | 98  | 98  | 0.21 | 0.22 | 0.52 | 0.78 | 0.65 | 0.58 | 0.56 |   |
| ANGPTL4 | rs1044250  | C/T | CDS      | Y | 100 | 99  | 0.08 | 0.07 | 0.30 | 0.64 | 0.67 | 0.47 | 0.81 |   |
|         | rs4076317  | C/G | Promoter | Y | 99  | 99  | 0.24 | 0.23 | 0.80 | 0.72 | 0.54 | 0.68 | 0.91 |   |
| ANPEP   | rs10584    | C/G | 3'UTR    | N | -   | -   | -    | -    | -    | -    | -    | -    | -    | - |
|         | rs25653    | T/C | CDS      | N | -   | -   | -    | -    | -    | -    | -    | -    | -    | - |
|         | rs8192297  | T/C | CDS      | N | -   | -   | -    | -    | -    | -    | -    | -    | -    | - |
| BAl1    | None       | -   | -        | - | -   | -   | -    | -    | -    | -    | -    | -    | -    | - |
| CCL11   | rs17735961 | A/C | Promoter | Y | 100 | 100 | 0.15 | 0.16 | 0.37 | 0.07 | 0.15 | 0.16 | 0.44 |   |
|         | rs17809012 | A/G | Promoter | Y | 99  | 100 | 0.32 | 0.31 | 0.18 | 0.06 | 0.36 | 0.07 | 0.88 |   |
|         | rs4795895  | A/G | Promoter | Y | 100 | 100 | 0.07 | 0.07 | 0.55 | 0.88 | 0.91 | 0.71 | 0.75 |   |
|         | rs4795896  | C/T | Promoter | Y | 100 | 100 | 0.38 | 0.39 | 0.04 | -    | -    | -    | -    |   |
| CCL2    | rs13900    | C/T | 3'UTR    | N | -   | -   | -    | -    | -    | -    | -    | -    | -    | - |
|         | rs2857656  | C/G | Promoter | Y | 100 | 100 | 0.37 | 0.37 | 0.04 | -    | -    | -    | -    | - |
|         | rs3760396  | C/G | Promoter | Y | 100 | 100 | 0.10 | 0.07 | 0.88 | 0.09 | 0.07 | 0.28 | 0.05 |   |
|         | rs11575012 | C/T | Promoter | N | -   | -   | -    | -    | -    | -    | -    | -    | -    | - |
| CDH5    | rs2344564  | C/T | IVS      | Y | 100 | 100 | 0.21 | 0.20 | 0.20 | 0.34 | 0.13 | 0.89 | 0.52 |   |
|         | rs7404629  | A/G | IVS      | Y | 100 | 100 | 0.27 | 0.28 | 0.97 | 0.91 | 0.71 | 0.86 | 0.77 |   |
|         | rs2344563  | C/T | IVS      | Y | 100 | 100 | 0.05 | 0.05 | 0.60 | 0.38 | 0.91 | 0.18 | 0.85 |   |
|         | rs1049970  | C/T | CDS      | N | -   | -   | -    | -    | -    | -    | -    | -    | -    | - |
|         | rs7499886  | G/A | IVS      | N | -   | -   | -    | -    | -    | -    | -    | -    | -    | - |
| COL18A1 | rs7499     | A/G | 3'UTR    | N | -   | -   | -    | -    | -    | -    | -    | -    | -    | - |
|         | rs2838920  | G/A | IVS      | N | -   | -   | -    | -    | -    | -    | -    | -    | -    | - |
|         | rs8131523  | C/T | IVS      | N | -   | -   | -    | -    | -    | -    | -    | -    | -    | - |
|         | rs2838919  | C/T | IVS      | N | -   | -   | -    | -    | -    | -    | -    | -    | -    | - |
|         | rs2230693  | C/G | CDS      | N | -   | -   | -    | -    | -    | -    | -    | -    | -    | - |
|         | rs8199     | G/A | 3'UTR    | N | -   | -   | -    | -    | -    | -    | -    | -    | -    | - |
| COL4A3  | rs10178458 | C/T | CDS      | Y | 100 | 100 | 0.10 | 0.12 | 0.28 | 0.12 | 0.06 | 0.64 | 0.07 |   |
|         | rs11677877 | A/G | CDS      | Y | 100 | 100 | 0.13 | 0.14 | 0.34 | 0.81 | 0.48 | 0.87 | 0.50 |   |
|         | rs13424243 | C/G | CDS      | Y | 100 | 99  | 0.08 | 0.08 | 0.03 | -    | -    | -    | -    |   |
|         | rs28381984 | C/T | CDS      | N | -   | -   | -    | -    | -    | -    | -    | -    | -    | - |
|         | rs6436669  | A/G | CDS      | Y | 95  | 98  | 0.09 | 0.12 | 0.11 | 0.12 | 0.41 | 0.06 | 0.06 |   |
| CSF3    | rs2227319  | A/G | Promoter | Y | 96  | 95  | 0.39 | 0.40 | 0.47 | 0.55 | 0.49 | 0.70 | 0.93 |   |

|        |            |     |          |   |     |     |      |      |      |       |       |      |       |   |
|--------|------------|-----|----------|---|-----|-----|------|------|------|-------|-------|------|-------|---|
|        | rs2227322  | C/G | 5'UTR    | N | -   | -   | -    | -    | -    | -     | -     | -    | -     | - |
|        | rs2227318  | C/T | Promoter | N | -   | -   | -    | -    | -    | -     | -     | -    | -     | - |
| CXCL1  | rs3117604  | C/A | Promoter | N | -   | -   | -    | -    | -    | -     | -     | -    | -     | - |
| CXCL2  | rs3806792  | C/T | Promoter | N | -   | -   | -    | -    | -    | -     | -     | -    | -     | - |
| CXCL9  | rs2276885  | G/A | Promoter | N | -   | -   | -    | -    | -    | -     | -     | -    | -     | - |
| CXCL10 | rs4256246  | A/G | Promoter | Y | 100 | 100 | 0.38 | 0.36 | 0.47 | 0.57  | 0.58  | 0.30 | 0.31  |   |
|        | rs4508917  | A/G | IVS      | N | -   | -   | -    | -    | -    | -     | -     | -    | -     | - |
| CXCL11 | rs10031983 | C/G | Promoter | Y | 100 | 100 | 0.39 | 0.39 | 0.73 | 0.84  | 0.72  | 0.80 | 0.72  |   |
| ECGF1  | rs11479    | G/A | IVS      | N | -   | -   | -    | -    | -    | -     | -     | -    | -     | - |
| EDG1   | rs3737578  | A/G | 5'UTR    | Y | 96  | 96  | 0.24 | 0.28 | 0.63 | 0.02  | 0.01  | 0.75 | 0.07  |   |
|        | rs3765684  | T/C | 5'UTR    | Y | 96  | 96  | 0.29 | 0.35 | 0.37 | 0.003 | 0.001 | 0.37 | 0.003 |   |
|        | rs12407294 | C/T | Promoter | N | -   | -   | -    | -    | -    | -     | -     | -    | -     | - |
|        | rs3737577  | C/A | 5'UTR    | N | -   | -   | -    | -    | -    | -     | -     | -    | -     | - |
|        | rs4987248  | G/C | 5'UTR    | N | -   | -   | -    | -    | -    | -     | -     | -    | -     | - |
| EFNA1  | rs4745     | A/T | CDS      | Y | 100 | 100 | 0.15 | 0.12 | 0.27 | 0.08  | 0.06  | 0.06 | 0.03  |   |
|        | rs9297     | A/G | IVS      | Y | 99  | 99  | 0.15 | 0.12 | 0.32 | 0.10  | 0.09  | 0.06 | 0.03  |   |
| EGF    | rs11568835 | A/G | Promoter | Y | 100 | 99  | 0.19 | 0.21 | 0.14 | 0.24  | 0.07  | 0.44 | 0.19  |   |
|        | rs11568943 | A/G | CDS      | Y | 100 | 100 | 0.23 | 0.20 | 0.09 | 0.09  | 0.04  | 0.39 | 0.15  |   |
|        | rs2237051  | A/G | CDS      | Y | 100 | 100 | 0.30 | 0.28 | 0.81 | 0.53  | 0.36  | 0.39 | 0.28  |   |
|        | rs4444903  | G/A | 5'UTR    | Y | 100 | 100 | 0.31 | 0.27 | 0.07 | 0.03  | 0.45  | 0.02 | 0.11  |   |
| ENG    | rs1800956  | C/G | CDS      | Y | 100 | 99  | 0.08 | 0.08 | 0.78 | 0.90  | 0.59  | 0.98 | 0.61  |   |
|        | rs35400405 | A/G | CDS      | Y | 97  | 99  | 0.00 | 0.00 | -    | -     | -     | -    | -     |   |
|        | rs10987758 | C/T | Promoter | N | -   | -   | -    | -    | -    | -     | -     | -    | -     | - |
| EPAS1  | rs1057773  | C/G | 3'UTR    | Y | 87  | 83  | 0.01 | 0.01 | 0.79 | -     | -     | -    | -     |   |
|        | rs17039192 | C/T | 5'UTR    | N | -   | -   | -    | -    | -    | -     | -     | -    | -     | - |
| EPHB4  | None       | -   | -        | - | -   | -   | -    | -    | -    | -     | -     | -    | -     | - |
| EREG   | rs3806794  | A/C | Promoter | Y | 100 | 100 | 0.09 | 0.09 | 0.61 | 0.56  | 0.39  | 0.60 | 0.78  |   |
| F2     | rs5896     | C/T | CDS      | N | -   | -   | -    | -    | -    | -     | -     | -    | -     | - |
| FGF2   | rs1048201  | C/T | 3'UTR    | N | -   | -   | -    | -    | -    | -     | -     | -    | -     | - |
|        | rs308393   | A/C | Promoter | N | -   | -   | -    | -    | -    | -     | -     | -    | -     | - |
| FGF6   | rs17183487 | G/T | Promoter | Y | 100 | 100 | 0.00 | 0.00 | -    | -     | -     | -    | -     |   |
|        | rs2970824  | G/A | Promoter | N | -   | -   | -    | -    | -    | -     | -     | -    | -     | - |
|        | rs2241286  | G/A | 3'UTR    | N | -   | -   | -    | -    | -    | -     | -     | -    | -     | - |
| FGFR3  | rs3135868  | G/A | IVS      | N | -   | -   | -    | -    | -    | -     | -     | -    | -     | - |
|        | rs17879199 | C/T | IVS      | N | -   | -   | -    | -    | -    | -     | -     | -    | -     | - |
|        | rs4450996  | A/C | IVS      | N | -   | -   | -    | -    | -    | -     | -     | -    | -     | - |
|        | rs736436   | G/A | Promoter | N | -   | -   | -    | -    | -    | -     | -     | -    | -     | - |
| FIGF   | rs5935960  | A/T | Promoter | Y | 99  | 99  | 0.40 | 0.37 | 0.00 | -     | -     | -    | -     |   |
|        | rs6632528  | C/T | 5'UTR    | Y | 100 | 100 | 0.39 | 0.37 | 0.00 | -     | -     | -    | -     |   |
|        | rs6632532  | G/T | Promoter | N | -   | -   | -    | -    | -    | -     | -     | -    | -     | - |
| FLT1   | None       | -   | -        | - | -   | -   | -    | -    | -    | -     | -     | -    | -     | - |
| HAND2  | rs2276941  | A/G | Promoter | Y | 89  | 87  | 0.20 | 0.19 | 0.08 | -     | -     | -    | -     |   |



|       |            |     |          |   |     |     |      |      |      |      |      |       |      |
|-------|------------|-----|----------|---|-----|-----|------|------|------|------|------|-------|------|
| HGF   | rs3735520  | C/T | Promoter | Y | 100 | 99  | 0.47 | 0.48 | 0.30 | 0.84 | 0.78 | 0.70  | 0.68 |
|       | rs5745608  | A/C | Promoter | Y | 100 | 100 | 0.00 | 0.00 | -    | -    | -    | -     | -    |
| HIF1A | rs2057482  | C/T | 3'UTR    | Y | 99  | 100 | 0.18 | 0.18 | 0.52 | 0.32 | 0.67 | 0.15  | 0.91 |
| HPSE  | rs11099592 | C/T | CDS      | Y | 100 | 99  | 0.15 | 0.14 | 0.08 | 0.08 | 0.16 | 0.13  | 0.43 |
| ID1   | rs1802548  | A/G | CDS      | N | -   | -   | -    | -    | -    | -    | -    | -     | -    |
| IFNA1 | rs10811543 | A/G | Promoter | Y | 99  | 100 | 0.22 | 0.23 | 0.80 | 0.80 | 0.91 | 0.72  | 0.80 |
|       | rs28383796 | C/T | 3'UTR    | N | -   | -   | -    | -    | -    | -    | -    | -     | -    |
|       | rs33965070 | C/G | CDS      | N | -   | -   | -    | -    | -    | -    | -    | -     | -    |
|       | rs34110353 | G/T | Promoter | N | -   | -   | -    | -    | -    | -    | -    | -     | -    |
|       | rs1758566  | C/T | 5'UTR    | N | -   | -   | -    | -    | -    | -    | -    | -     | -    |
| IFNB1 | rs10964831 | A/T | Promoter | Y | 100 | 100 | 0.14 | 0.15 | 0.67 | 0.64 | 0.55 | 0.41  | 0.44 |
| IFNG  | rs2069705  | C/T | Promoter | Y | 87  | 92  | 0.15 | 0.21 | 0.60 | -    | -    | -     | -    |
|       | rs2069732  | G/A | Promoter | N | -   | -   | -    | -    | -    | -    | -    | -     | -    |
| IGF1  | rs2288377  | A/T | Promoter | Y | 88  | 92  | 0.27 | 0.27 | 0.17 | -    | -    | -     | -    |
| IL10  | rs1800872  | A/C | Promoter | Y | 100 | 100 | 0.28 | 0.30 | 0.28 | 0.47 | 0.51 | 0.19  | 0.28 |
|       | rs1800896  | A/G | Promoter | Y | 100 | 100 | 0.08 | 0.08 | 0.32 | 0.90 | 0.86 | 0.65  | 0.80 |
| IL18  | rs187238   | C/G | Promoter | Y | 97  | 99  | 0.14 | 0.15 | 0.57 | 0.48 | 0.24 | 1.00  | 0.74 |
|       | rs5744247  | C/G | IVS      | Y | 100 | 100 | 0.38 | 0.38 | 0.96 | 0.99 | 0.94 | 0.98  | 0.97 |
|       | rs360719   | A/G | Promoter | Y | 99  | 99  | 0.13 | 0.14 | 0.44 | 0.58 | 0.66 | 0.33  | 0.50 |
|       | rs1946518  | G/T | Promoter | N | -   | -   | -    | -    | -    | -    | -    | -     | -    |
|       | rs360717   | G/A | 5'UTR    | N | -   | -   | -    | -    | -    | -    | -    | -     | -    |
|       | rs360718   | A/C | 5'UTR    | N | -   | -   | -    | -    | -    | -    | -    | -     | -    |
|       | rs360721   | C/G | IVS      | N | -   | -   | -    | -    | -    | -    | -    | -     | -    |
|       | rs4988359  | A/G | IVS      | N | -   | -   | -    | -    | -    | -    | -    | -     | -    |
| IL1B  | rs1143627  | G/A | Promoter | N | -   | -   | -    | -    | -    | -    | -    | -     | -    |
|       | rs1143625  | T/C | Promoter | N | -   | -   | -    | -    | -    | -    | -    | -     | -    |
| IL6   | rs1800796  | C/G | Promoter | Y | 96  | 94  | 0.24 | 0.25 | 0.62 | -    | -    | -     | -    |
|       | rs3087223  | C/G | Promoter | N | -   | -   | -    | -    | -    | -    | -    | -     | -    |
|       | rs3087225  | C/G | Promoter | N | -   | -   | -    | -    | -    | -    | -    | -     | -    |
|       | rs3087226  | G/C | 5'UTR    | N | -   | -   | -    | -    | -    | -    | -    | -     | -    |
| IL8   | rs4073     | A/T | Promoter | N | -   | -   | -    | -    | -    | -    | -    | -     | -    |
| ITGAV | rs9333288  | A/G | IVS      | Y | 100 | 100 | 0.12 | 0.14 | 0.81 | 0.19 | 0.12 | 0.75  | 0.20 |
| ITGB3 | rs3809861  | A/G | Promoter | Y | 97  | 95  | 0.47 | 0.47 | 0.37 | -    | -    | -     | -    |
|       | rs3809862  | C/T | Promoter | Y | 99  | 99  | 0.47 | 0.47 | 0.96 | 0.01 | 0.08 | 0.005 | 0.01 |
|       | rs7208055  | C/A | Promoter | Y | 100 | 99  | 0.25 | 0.29 | 0.14 | 0.05 | 0.11 | 0.03  | 0.03 |
|       | rs7208170  | A/G | Promoter | N | -   | -   | -    | -    | -    | -    | -    | -     | -    |
|       | rs2317384  | G/A | Promoter | N | -   | -   | -    | -    | -    | -    | -    | -     | -    |
| JAG1  | rs1131695  | C/T | IVS      | Y | 97  | 99  | 0.30 | 0.30 | 0.87 | 0.26 | 0.55 | 0.19  | 0.92 |
|       | rs2273060  | A/G | IVS      | N | -   | -   | -    | -    | -    | -    | -    | -     | -    |
|       | rs6040073  | A/C | 5'UTR    | N | -   | -   | -    | -    | -    | -    | -    | -     | -    |
| KDR   | rs1870377  | A/T | CDS      | Y | 100 | 100 | 0.41 | 0.43 | 0.11 | 0.22 | 0.13 | 0.98  | 0.40 |
|       | rs2305948  | C/T | CDS      | Y | 100 | 100 | 0.11 | 0.11 | 0.71 | 0.10 | 0.79 | 0.07  | 0.52 |

|        |            |     |          |   |     |     |      |      |      |      |      |      |      |   |
|--------|------------|-----|----------|---|-----|-----|------|------|------|------|------|------|------|---|
|        | rs28695311 | C/G | Promoter | N | -   | -   | -    | -    | -    | -    | -    | -    | -    | - |
|        | rs7667298  | C/T | 5'UTR    | Y | 99  | 98  | 0.28 | 0.30 | 0.29 | 0.56 | 0.39 | 0.44 | 0.31 |   |
|        | rs2239702  | G/A | Promoter | N | -   | -   | -    | -    | -    | -    | -    | -    | -    | - |
|        | rs9994560  | G/A | Promoter | N | -   | -   | -    | -    | -    | -    | -    | -    | -    | - |
| LAMA5  | rs11698080 | C/T | CDS      | N | -   | -   | -    | -    | -    | -    | -    | -    | -    | - |
|        | rs2297587  | T/C | CDS      | N | -   | -   | -    | -    | -    | -    | -    | -    | -    | - |
|        | rs3184293  | C/T | 3'UTR    | Y | 83  | 88  | 0.01 | 0.01 | 0.81 | -    | -    | -    | -    | - |
|        | rs3810552  | A/G | Promoter | N | -   | -   | -    | -    | -    | -    | -    | -    | -    | - |
|        | rs4925229  | C/T | CDS      | N | -   | -   | -    | -    | -    | -    | -    | -    | -    | - |
|        | rs944895   | G/A | CDS      | N | -   | -   | -    | -    | -    | -    | -    | -    | -    | - |
|        | rs2427283  | C/T | CDS      | N | -   | -   | -    | -    | -    | -    | -    | -    | -    | - |
|        | rs2274934  | T/C | CDS      | N | -   | -   | -    | -    | -    | -    | -    | -    | -    | - |
|        | rs3737137  | T/C | CDS      | N | -   | -   | -    | -    | -    | -    | -    | -    | -    | - |
| LECT1  | rs3759509  | G/T | Promoter | N | -   | -   | -    | -    | -    | -    | -    | -    | -    | - |
| LEP    | rs13228377 | A/G | Promoter | Y | 95  | 95  | 0.24 | 0.25 | 0.26 | -    | -    | -    | -    | - |
|        | rs28954105 | G/T | IVS      | Y | 94  | 94  | 0.00 | 0.00 | 0.98 | -    | -    | -    | -    | - |
|        | rs2167270  | A/G | 5'UTR    | Y | 99  | 97  | 0.19 | 0.20 | 0.75 | 0.71 | 0.52 | 0.48 | 0.41 |   |
| MMP2   | rs14070    | C/T | IVS      | Y | 97  | 96  | 0.29 | 0.30 | 0.55 | 0.94 | 0.89 | 0.67 | 0.77 |   |
|        | rs2285053  | C/T | Promoter | N | -   | -   | -    | -    | -    | -    | -    | -    | -    | - |
|        | rs2285052  | A/C | Promoter | N | -   | -   | -    | -    | -    | -    | -    | -    | -    | - |
|        | rs2287073  | C/G | 5'UTR    | N | -   | -   | -    | -    | -    | -    | -    | -    | -    | - |
| MMP9   | rs17577    | A/G | IVS      | Y | 100 | 100 | 0.16 | 0.13 | 0.82 | 0.10 | 0.06 | 0.08 | 0.04 |   |
|        | rs17576    | A/G | CDS      | Y | 99  | 99  | 0.32 | 0.32 | 0.70 | 0.99 | 0.81 | 0.81 | 0.78 |   |
|        | rs3918254  | C/T | IVS      | N | -   | -   | -    | -    | -    | -    | -    | -    | -    | - |
|        | rs20544    | C/T | 3'UTR    | N | -   | -   | -    | -    | -    | -    | -    | -    | -    | - |
|        | rs2250889  | C/G | CDS      | N | -   | -   | -    | -    | -    | -    | -    | -    | -    | - |
|        | rs25650    | C/G | CDS      | N | -   | -   | -    | -    | -    | -    | -    | -    | -    | - |
|        | rs2274756  | G/A | CDS      | N | -   | -   | -    | -    | -    | -    | -    | -    | -    | - |
| MMP19  | rs12372076 | C/G | Promoter | Y | 99  | 98  | 0.13 | 0.12 | 0.43 | 0.37 | 0.20 | 0.78 | 0.56 |   |
| NOTCH4 | rs17604492 | C/T | CDS      | Y | 100 | 100 | 0.11 | 0.11 | 0.60 | 0.34 | 0.81 | 0.16 | 0.91 |   |
|        | rs2267644  | A/G | Promoter | Y | 100 | 100 | 0.03 | 0.03 | 0.45 | -    | -    | -    | -    | - |
|        | rs367398   | A/G | 5'UTR    | N | -   | -   | -    | -    | -    | -    | -    | -    | -    | - |
|        | rs397081   | C/T | Promoter | N | -   | -   | -    | -    | -    | -    | -    | -    | -    | - |
|        | rs422951   | T/C | CDS      | N | -   | -   | -    | -    | -    | -    | -    | -    | -    | - |
|        | rs8192564  | G/A | 5'UTR    | N | -   | -   | -    | -    | -    | -    | -    | -    | -    | - |
|        | rs8192579  | T/C | Promoter | N | -   | -   | -    | -    | -    | -    | -    | -    | -    | - |
|        | rs3134929  | G/C | Promoter | N | -   | -   | -    | -    | -    | -    | -    | -    | -    | - |
|        | rs12055568 | A/G | Promoter | N | -   | -   | -    | -    | -    | -    | -    | -    | -    | - |
|        | rs2395106  | A/G | Promoter | N | -   | -   | -    | -    | -    | -    | -    | -    | -    | - |
|        | rs3134930  | T/C | IVS      | N | -   | -   | -    | -    | -    | -    | -    | -    | -    | - |
|        | rs915894   | T/G | CDS      | N | -   | -   | -    | -    | -    | -    | -    | -    | -    | - |
| NRP1   | rs2229934  | C/T | IVS      | Y | 100 | 100 | 0.35 | 0.34 | 0.79 | 0.54 | 0.33 | 0.51 | 0.34 |   |

|          |            |            |          |          |     |     |      |      |      |      |      |      |      |      |
|----------|------------|------------|----------|----------|-----|-----|------|------|------|------|------|------|------|------|
| NRP2     | rs849535   | C/G        | Promoter | Y        | 100 | 100 | 0.04 | 0.04 | 0.25 | -    | -    | -    | -    |      |
|          | rs10090    | G/A        | 5'UTR    | N        | -   | -   | -    | -    | -    | -    | -    | -    | -    |      |
| NUDT6    | rs12648093 | A/G        | CDS      | Y        | 100 | 100 | 0.08 | 0.06 | 0.36 | 0.18 | 0.21 | 0.14 | 0.10 |      |
| PECAM1   | rs2812     | A/G        | 3'UTR    | Y        | 100 | 100 | 0.32 | 0.35 | 0.30 | 0.11 | 0.04 | 0.71 | 0.21 |      |
|          | rs1131012  | T/C        | CDS      | N        | -   | -   | -    | -    | -    | -    | -    | -    | -    |      |
| PF4      | rs3756074  | C/G        | Promoter | Y        | 94  | 93  | 0.12 | 0.14 | 0.25 | -    | -    | -    | -    |      |
| PLAU     | rs1916340  | G/T        | 3'UTR    | Y        | 0   | 0   | -    | -    | -    | -    | -    | -    | -    |      |
|          | rs2227557  | C/T        | Promoter | Y        | 98  | 99  | 0.00 | 0.00 | -    | -    | -    | -    | -    |      |
|          | rs2227562  | G/A        | IVS      | N        | -   | -   | -    | -    | -    | -    | -    | -    | -    |      |
|          | rs2227564  | C/T        | Promoter | Y        | 98  | 98  | 0.24 | 0.27 | 0.59 | 0.32 | 0.42 | 0.17 | 0.23 |      |
| PLG      | rs2227560  | A/G        | IVS      | N        | -   | -   | -    | -    | -    | -    | -    | -    | -    |      |
|          | rs1830521  | A/C        | Promoter | Y        | 99  | 100 | 0.18 | 0.18 | 0.67 | 0.65 | 0.38 | 0.77 | 0.96 |      |
|          | rs1864449  | A/G        | Promoter | Y        | 100 | 100 | 0.19 | 0.19 | 0.94 | 0.82 | 0.95 | 0.49 | 0.85 |      |
|          | rs4252050  | A/G        | Promoter | N        | -   | -   | -    | -    | -    | -    | -    | -    | -    |      |
|          | rs4252060  | A/G        | 5'UTR    | N        | -   | -   | -    | -    | -    | -    | -    | -    | -    |      |
|          | rs1864450  | G/A        | Promoter | N        | -   | -   | -    | -    | -    | -    | -    | -    | -    |      |
|          | rs1950562  | T/C        | Promoter | N        | -   | -   | -    | -    | -    | -    | -    | -    | -    |      |
|          | rs4110432  | T/C        | Promoter | N        | -   | -   | -    | -    | -    | -    | -    | -    | -    |      |
|          | rs4252051  | C/T        | Promoter | N        | -   | -   | -    | -    | -    | -    | -    | -    | -    |      |
|          | rs4252052  | C/T        | Promoter | N        | -   | -   | -    | -    | -    | -    | -    | -    | -    |      |
|          | rs4252053  | A/G        | Promoter | N        | -   | -   | -    | -    | -    | -    | -    | -    | -    |      |
|          | rs4252055  | G/A        | Promoter | N        | -   | -   | -    | -    | -    | -    | -    | -    | -    |      |
|          | rs6690     | G/A        | 3'UTR    | N        | -   | -   | -    | -    | -    | -    | -    | -    | -    |      |
|          | PTEN       | rs12573787 | G/A      | Promoter | N   | -   | -    | -    | -    | -    | -    | -    | -    | -    |
|          | PTGS1      | rs3842787  | C/T      | CDS      | N   | -   | -    | -    | -    | -    | -    | -    | -    | -    |
|          | PTGS2      | rs5275     | C/T      | IVS      | Y   | 100 | 99   | 0.21 | 0.22 | 0.39 | 0.78 | 0.48 | 0.89 | 0.71 |
| rs20417  |            | C/G        | Promoter | Y        | 97  | 98  | 0.04 | 0.05 | 0.24 | -    | -    | -    | -    |      |
| rs689465 |            | T/C        | Promoter | N        | -   | -   | -    | -    | -    | -    | -    | -    | -    |      |
| SERPINF1 | rs689466   | A/G        | Promoter | N        | -   | -   | -    | -    | -    | -    | -    | -    | -    |      |
|          | rs9913583  | A/C        | 5'UTR    | Y        | 100 | 100 | 0.12 | 0.11 | 0.30 | 0.24 | 0.20 | 0.48 | 0.75 |      |
| SH2D2A   | rs1136287  | C/T        | CDS      | N        | -   | -   | -    | -    | -    | -    | -    | -    | -    |      |
|          | rs2768764  | A/T        | Promoter | Y        | 95  | 100 | 0.11 | 0.10 | 0.88 | 0.51 | 0.75 | 0.29 | 0.94 |      |
| SPHK1    | rs926103   | A/G        | Promoter | N        | -   | -   | -    | -    | -    | -    | -    | -    | -    |      |
|          | rs346801   | G/A        | 3'UTR    | N        | -   | -   | -    | -    | -    | -    | -    | -    | -    |      |
| STAB1    | rs908721   | G/A        | Promoter | N        | -   | -   | -    | -    | -    | -    | -    | -    | -    |      |
|          | rs4434138  | A/G        | CDS      | N        | -   | -   | -    | -    | -    | -    | -    | -    | -    |      |
|          | rs758800   | C/T        | Promoter | Y        | 92  | 96  | 0.11 | 0.11 | 0.74 | -    | -    | -    | -    |      |
| STAB2    | rs13303    | C/T        | 3'UTR    | N        | -   | -   | -    | -    | -    | -    | -    | -    | -    |      |
|          | rs11111667 | A/G        | Promoter | Y        | 99  | 99  | 0.17 | 0.16 | 0.62 | 0.86 | 0.70 | 0.59 | 0.61 |      |
|          | rs1609860  | A/C        | CDS      | Y        | 95  | 95  | 0.11 | 0.14 | 0.03 | -    | -    | -    | -    |      |
|          | rs17034433 | A/C        | CDS      | Y        | 100 | 100 | 0.04 | 0.03 | 0.40 | -    | -    | -    | -    |      |
|          | rs7303682  | A/C        | Promoter | Y        | 100 | 100 | 0.43 | 0.43 | 0.54 | 0.95 | 0.75 | 0.89 | 0.89 |      |

|  |         |            |     |          |   |     |     |      |      |      |      |      |      |      |
|--|---------|------------|-----|----------|---|-----|-----|------|------|------|------|------|------|------|
|  |         | rs2271637  | G/C | CDS      | N | -   | -   | -    | -    | -    | -    | -    | -    | -    |
|  | TEK     | rs34032300 | A/G | CDS      | Y | 100 | 100 | 0.00 | 0.00 | -    | -    | -    | -    | -    |
|  |         | rs657867   | A/G | Promoter | Y | 100 | 100 | 0.05 | 0.05 | 0.76 | -    | -    | -    | -    |
|  |         | rs638203   | G/A | IVS      | N | -   | -   | -    | -    | -    | -    | -    | -    | -    |
|  | TGFA    | None       | -   | -        | - | -   | -   | -    | -    | -    | -    | -    | -    | -    |
|  | TGFB1   | rs1800469  | G/A | 3'UTR    | N | -   | -   | -    | -    | -    | -    | -    | -    | -    |
|  | TGFB2   | rs7550232  | A/C | Promoter | Y | 98  | 97  | 0.08 | 0.08 | 0.05 | 0.06 | -    | -    | -    |
|  | THBS1   | rs1478604  | G/A | 5'UTR    | N | -   | -   | -    | -    | -    | -    | -    | -    | -    |
|  |         | rs1478605  | G/A | 5'UTR    | N | -   | -   | -    | -    | -    | -    | -    | -    | -    |
|  | THBS2   | rs12435    | C/T | 3'UTR    | Y | 98  | 98  | 0.23 | 0.22 | 0.14 | 0.55 | 0.36 | 0.99 | 0.75 |
|  |         | rs11758161 | C/T | IVS      | Y | 100 | 100 | 0.21 | 0.21 | 0.11 | 0.17 | 0.50 | 0.21 | 0.89 |
|  |         | rs36088849 | G/C | CDS      | N | -   | -   | -    | -    | -    | -    | -    | -    | -    |
|  | TIMP1   | rs4898     | C/T | IVS      | N | -   | -   | -    | -    | -    | -    | -    | -    | -    |
|  |         | rs11551797 | C/T | IVS      | N | -   | -   | -    | -    | -    | -    | -    | -    | -    |
|  | TIMP2   | rs8080623  | A/G | Promoter | Y | 100 | 100 | 0.22 | 0.24 | 0.65 | 0.40 | 0.35 | 0.46 | 0.63 |
|  |         | rs7503607  | G/T | 5'UTR    | N | -   | -   | -    | -    | -    | -    | -    | -    | -    |
|  |         | rs7503726  | C/T | 5'UTR    | N | -   | -   | -    | -    | -    | -    | -    | -    | -    |
|  |         | rs8179093  | T/G | Promoter | N | -   | -   | -    | -    | -    | -    | -    | -    | -    |
|  |         | rs8179096  | G/A | Promoter | N | -   | -   | -    | -    | -    | -    | -    | -    | -    |
|  |         | rs8179091  | G/A | Promoter | N | -   | -   | -    | -    | -    | -    | -    | -    | -    |
|  | TIMP3   | rs9619311  | C/T | Promoter | Y | 98  | 93  | 0.07 | 0.07 | 0.65 | -    | -    | -    | -    |
|  |         | rs11547635 | C/T | IVS      | N | -   | -   | -    | -    | -    | -    | -    | -    | -    |
|  |         | rs9862     | C/A | IVS      | N | -   | -   | -    | -    | -    | -    | -    | -    | -    |
|  | TNFAIP2 | rs8176359  | G/A | Promoter | N | -   | -   | -    | -    | -    | -    | -    | -    | -    |
|  |         | rs1132339  | C/G | CDS      | N | -   | -   | -    | -    | -    | -    | -    | -    | -    |
|  |         | rs3178152  | G/C | CDS      | N | -   | -   | -    | -    | -    | -    | -    | -    | -    |
|  | TNFSF15 | rs7848647  | C/T | Promoter | N | -   | -   | -    | -    | -    | -    | -    | -    | -    |
|  | TNNT1   | rs9636153  | C/T | 5'UTR    | Y | 89  | 93  | 0.20 | 0.22 | 0.40 | -    | -    | -    | -    |
|  | VEGFA   | rs1005230  | C/T | Promoter | Y | 100 | 100 | 0.28 | 0.28 | 0.66 | 0.97 | 0.81 | 1.00 | 0.85 |
|  |         | rs2010963  | C/G | 5'UTR    | Y | 90  | 91  | 0.45 | 0.43 | 0.04 | -    | -    | -    | -    |
|  | ATM     | rs609261   | A/G | 5'UTR    | Y | 100 | 100 | 0.38 | 0.40 | 0.79 | 0.26 | 0.90 | 0.10 | 0.34 |
|  |         | rs189037   | G/A | 5'UTR    | N | -   | -   | -    | -    | -    | -    | -    | -    | -    |
|  |         | rs17174393 | G/A | IVS      | N | -   | -   | -    | -    | -    | -    | -    | -    | -    |
|  | BRCA1   | rs1799966  | A/G | CDS      | Y | 100 | 100 | 0.31 | 0.32 | 0.75 | 0.77 | 0.59 | 0.57 | 0.51 |
|  |         | rs4986854  | C/T | CDS      | Y | 99  | 99  | 0.03 | 0.02 | 0.68 | -    | -    | -    | -    |
|  |         | rs799908   | G/A | Promoter | N | -   | -   | -    | -    | -    | -    | -    | -    | -    |
|  | BRCA2   | rs11571653 | A/G | CDS      | Y | 100 | 99  | 0.01 | 0.01 | 0.00 | -    | -    | -    | -    |
|  |         | rs144848   | G/T | CDS      | Y | 96  | 98  | 0.26 | 0.27 | 0.92 | 0.89 | 0.95 | 0.65 | 0.70 |
|  |         | rs206118   | C/T | 5'UTR    | Y | 97  | 96  | 0.19 | 0.18 | 0.46 | 0.66 | 0.75 | 0.49 | 0.48 |
|  |         | rs3092989  | G/A | Promoter | Y | 100 | 99  | 0.11 | 0.14 | 0.39 | 0.04 | 0.34 | 0.03 | 0.15 |
|  |         | rs766173   | G/T | CDS      | Y | 100 | 100 | 0.13 | 0.15 | 0.89 | 0.27 | 0.95 | 0.12 | 0.17 |
|  |         | rs1799943  | G/A | 5'UTR    | N | -   | -   | -    | -    | -    | -    | -    | -    | -    |

Cancer Pathway  
(n=42)

|         |            |     |          |   |     |     |      |      |      |      |      |      |      |   |
|---------|------------|-----|----------|---|-----|-----|------|------|------|------|------|------|------|---|
|         | rs206115   | A/G | Promoter | N | -   | -   | -    | -    | -    | -    | -    | -    | -    | - |
|         | rs206116   | G/A | Promoter | N | -   | -   | -    | -    | -    | -    | -    | -    | -    | - |
| CD82    | rs934178   | G/A | Promoter | N | -   | -   | -    | -    | -    | -    | -    | -    | -    | - |
|         | rs1139971  | A/G | CDS      | N | -   | -   | -    | -    | -    | -    | -    | -    | -    | - |
| CDC25A  | rs3731485  | C/G | Promoter | Y | 99  | 99  | 0.14 | 0.12 | 0.11 | 0.23 | 0.60 | 0.10 | 0.36 |   |
|         | rs3731487  | G/A | 5'UTR    | N | -   | -   | -    | -    | -    | -    | -    | -    | -    | - |
| CDK4    | rs2072052  | A/C | Promoter | Y | 95  | 96  | 0.31 | 0.29 | 0.68 | -    | -    | -    | -    | - |
|         | rs3211605  | C/T | Promoter | Y | 94  | 96  | 0.00 | 0.00 | -    | -    | -    | -    | -    | - |
| CHEK2   | rs2236141  | C/T | Promoter | Y | 91  | 93  | 0.13 | 0.15 | 0.04 | -    | -    | -    | -    | - |
|         | rs2236142  | C/G | Promoter | N | -   | -   | -    | -    | -    | -    | -    | -    | -    | - |
| E2F1    | rs35385772 | A/G | CDS      | Y | 96  | 97  | 0.00 | 0.00 | -    | -    | -    | -    | -    | - |
|         | rs3213141  | G/A | Promoter | N | -   | -   | -    | -    | -    | -    | -    | -    | -    | - |
| FGFR2   | rs755793   | G/A | CDS      | N | -   | -   | -    | -    | -    | -    | -    | -    | -    | - |
| FOS     | rs932257   | G/T | Promoter | N | -   | -   | -    | -    | -    | -    | -    | -    | -    | - |
|         | rs4645856  | C/T | IVS      | N | -   | -   | -    | -    | -    | -    | -    | -    | -    | - |
|         | rs7101     | C/T | 5'UTR    | N | -   | -   | -    | -    | -    | -    | -    | -    | -    | - |
|         | rs2239615  | T/A | 5'UTR    | N | -   | -   | -    | -    | -    | -    | -    | -    | -    | - |
| GZMA    | rs3136555  | G/C | Promoter | N | -   | -   | -    | -    | -    | -    | -    | -    | -    | - |
|         | rs2069186  | G/A | Promoter | N | -   | -   | -    | -    | -    | -    | -    | -    | -    | - |
|         | rs2069187  | G/A | Promoter | N | -   | -   | -    | -    | -    | -    | -    | -    | -    | - |
| HTATIP2 | rs931643   | G/A | Promoter | N | -   | -   | -    | -    | -    | -    | -    | -    | -    | - |
|         | rs3808990  | G/A | Promoter | N | -   | -   | -    | -    | -    | -    | -    | -    | -    | - |
|         | rs3824886  | G/T | CDS      | N | -   | -   | -    | -    | -    | -    | -    | -    | -    | - |
|         | rs16906113 | C/T | Promoter | N | -   | -   | -    | -    | -    | -    | -    | -    | -    | - |
| ICAM1   | rs5491     | A/T | CDS      | N | -   | -   | -    | -    | -    | -    | -    | -    | -    | - |
|         | rs5498     | A/G | CDS      | N | -   | -   | -    | -    | -    | -    | -    | -    | -    | - |
| ITGA1   | rs16880238 | A/C | Promoter | N | -   | -   | -    | -    | -    | -    | -    | -    | -    | - |
|         | rs4865744  | G/A | Promoter | N | -   | -   | -    | -    | -    | -    | -    | -    | -    | - |
|         | rs4865745  | C/T | Promoter | N | -   | -   | -    | -    | -    | -    | -    | -    | -    | - |
|         | rs10471813 | A/T | Promoter | N | -   | -   | -    | -    | -    | -    | -    | -    | -    | - |
|         | rs4145748  | C/T | CDS      | N | -   | -   | -    | -    | -    | -    | -    | -    | -    | - |
|         | rs988574   | A/G | CDS      | N | -   | -   | -    | -    | -    | -    | -    | -    | -    | - |
|         | rs11886    | G/T | 3'UTR    | N | -   | -   | -    | -    | -    | -    | -    | -    | -    | - |
| ITGA2   | rs26679    | G/C | Promoter | N | -   | -   | -    | -    | -    | -    | -    | -    | -    | - |
|         | rs26680    | C/A | Promoter | N | -   | -   | -    | -    | -    | -    | -    | -    | -    | - |
|         | rs3212383  | C/T | Promoter | N | -   | -   | -    | -    | -    | -    | -    | -    | -    | - |
|         | rs2287870  | G/A | CDS      | N | -   | -   | -    | -    | -    | -    | -    | -    | -    | - |
|         | rs3212385  | G/A | 5'UTR    | N | -   | -   | -    | -    | -    | -    | -    | -    | -    | - |
|         | rs28095    | C/T | Promoter | N | -   | -   | -    | -    | -    | -    | -    | -    | -    | - |
| ITGA3   | rs4794094  | C/T | Promoter | N | -   | -   | -    | -    | -    | -    | -    | -    | -    | - |
|         | rs16970080 | G/C | 5'UTR    | N | -   | -   | -    | -    | -    | -    | -    | -    | -    | - |
| ITGA4   | rs1143676  | A/G | IVS      | Y | 100 | 100 | 0.20 | 0.19 | 0.99 | 0.53 | 0.33 | 0.68 | 0.47 |   |





|          |            |     |          |   |     |     |      |      |      |      |      |      |      |
|----------|------------|-----|----------|---|-----|-----|------|------|------|------|------|------|------|
| CCNH     | rs1807895  | G/T | Promoter | Y | 0   | 0   | -    | -    | -    | -    | -    | -    | -    |
|          | rs2290280  | C/A | 5'UTR    | N | -   | -   | -    | -    | -    | -    | -    | -    | -    |
|          | rs2230641  | G/A | CDS      | N | -   | -   | -    | -    | -    | -    | -    | -    | -    |
|          | rs2266690  | T/C | CDS      | N | -   | -   | -    | -    | -    | -    | -    | -    | -    |
| CCNT1    | rs2291728  | C/G | 5'UTR    | Y | 100 | 100 | 0.26 | 0.26 | 0.03 | -    | -    | -    | -    |
| CCNT2    | rs2218558  | C/T | Promoter | Y | 100 | 100 | 0.13 | 0.15 | 0.78 | 0.62 | 0.49 | 0.37 | 0.38 |
|          | rs1348793  | T/C | Promoter | N | -   | -   | -    | -    | -    | -    | -    | -    | -    |
| CDC2     | rs1871446  | C/T | 3'UTR    | Y | 98  | 99  | 0.18 | 0.18 | 0.69 | 0.06 | 0.52 | 0.04 | 0.94 |
|          | rs2448343  | A/G | Promoter | Y | 98  | 96  | 0.23 | 0.24 | 0.13 | 0.31 | 0.16 | 0.92 | 0.64 |
| CDC6     | rs2260179  | C/G | IVS      | N | -   | -   | -    | -    | -    | -    | -    | -    | -    |
|          | rs13706    | A/G | CDS      | N | -   | -   | -    | -    | -    | -    | -    | -    | -    |
|          | rs4134994  | G/A | Promoter | N | -   | -   | -    | -    | -    | -    | -    | -    | -    |
| CDC7     | rs12138037 | C/G | Promoter | Y | 99  | 99  | 0.30 | 0.26 | 0.06 | 0.06 | 0.02 | 0.41 | 0.03 |
|          | rs13447450 | C/T | Promoter | Y | 100 | 100 | 0.07 | 0.09 | 0.71 | 0.22 | 0.09 | 0.44 | 0.08 |
| CDC16    | rs565451   | G/A | Promoter | N | -   | -   | -    | -    | -    | -    | -    | -    | -    |
|          | rs10870597 | A/G | Promoter | Y | 99  | 97  | 0.17 | 0.17 | 0.06 | 0.24 | 0.43 | 0.23 | 0.78 |
|          | rs17337612 | G/C | Promoter | N | -   | -   | -    | -    | -    | -    | -    | -    | -    |
|          | rs17337724 | A/G | 5'UTR    | Y | 95  | 89  | 0.06 | 0.08 | 0.35 | -    | -    | -    | -    |
|          | rs9590404  | C/G | Promoter | N | -   | -   | -    | -    | -    | -    | -    | -    | -    |
|          | rs9590405  | G/A | Promoter | N | -   | -   | -    | -    | -    | -    | -    | -    | -    |
|          | rs17337696 | G/A | Promoter | N | -   | -   | -    | -    | -    | -    | -    | -    | -    |
|          | rs17337703 | G/A | 5'UTR    | N | -   | -   | -    | -    | -    | -    | -    | -    | -    |
|          | rs7321688  | C/A | 5'UTR    | N | -   | -   | -    | -    | -    | -    | -    | -    | -    |
|          | rs7336692  | C/T | Promoter | N | -   | -   | -    | -    | -    | -    | -    | -    | -    |
| CDC25C   | rs6861656  | C/T | 5'UTR    | N | -   | -   | -    | -    | -    | -    | -    | -    | -    |
|          | rs3734166  | A/G | CDS      | N | -   | -   | -    | -    | -    | -    | -    | -    | -    |
| CDC34    | rs16989712 | G/A | Promoter | N | -   | -   | -    | -    | -    | -    | -    | -    | -    |
|          | rs16989724 | C/T | Promoter | N | -   | -   | -    | -    | -    | -    | -    | -    | -    |
| CDC45L   | rs16990498 | A/C | Promoter | N | -   | -   | -    | -    | -    | -    | -    | -    | -    |
|          | rs5993649  | A/G | Promoter | Y | 98  | 92  | 0.22 | 0.24 | 0.42 | -    | -    | -    | -    |
|          | rs13447182 | G/T | 5'UTR    | N | -   | -   | -    | -    | -    | -    | -    | -    | -    |
|          | rs13447289 | C/T | IVS      | N | -   | -   | -    | -    | -    | -    | -    | -    | -    |
| CDK5R1   | rs2073760  | C/A | IVS      | N | -   | -   | -    | -    | -    | -    | -    | -    | -    |
|          | rs756785   | A/G | Promoter | Y | 0   | 0   | -    | -    | -    | -    | -    | -    | -    |
| CDK5R2   | rs359983   | C/T | Promoter | Y | 0   | 0   | -    | -    | -    | -    | -    | -    | -    |
| CDK5RAP3 | rs2285860  | G/T | Promoter | N | -   | -   | -    | -    | -    | -    | -    | -    | -    |
|          | rs2525083  | C/G | Promoter | Y | 93  | 97  | 0.43 | 0.43 | 0.03 | -    | -    | -    | -    |
|          | rs35054799 | C/G | 3'UTR    | Y | 95  | 94  | 0.00 | 0.00 | 0.97 | -    | -    | -    | -    |
|          | rs886444   | A/G | IVS      | Y | 97  | 98  | 0.03 | 0.03 | 0.40 | -    | -    | -    | -    |
|          | rs2525084  | G/A | Promoter | N | -   | -   | -    | -    | -    | -    | -    | -    | -    |
| CDKN1C   | rs452338   | G/T | Promoter | N | -   | -   | -    | -    | -    | -    | -    | -    | -    |
| CDKN2B   | rs2069418  | C/G | Promoter | Y | 99  | 100 | 0.13 | 0.14 | 0.81 | 0.79 | 0.39 | 0.55 | 0.44 |







|                                        |         |            |     |          |   |     |     |      |      |      |      |      |      |      |
|----------------------------------------|---------|------------|-----|----------|---|-----|-----|------|------|------|------|------|------|------|
|                                        | RBBP8   | rs2305885  | G/T | Promoter | Y | 100 | 99  | 0.05 | 0.04 | 0.97 | -    | -    | -    | -    |
|                                        | RBL2    | rs3929     | C/G | 3'UTR    | Y | 99  | 99  | 0.15 | 0.14 | 0.54 | 0.58 | 0.61 | 0.40 | 0.37 |
|                                        | RGC32   | None       | -   | -        | - | -   | -   | -    | -    | -    | -    | -    | -    | -    |
|                                        | RPA3    | rs13245945 | C/T | Promoter | Y | 100 | 100 | 0.06 | 0.07 | 0.92 | 0.42 | 0.32 | 0.28 | 0.23 |
|                                        |         | rs7792009  | C/T | IVS      | Y | 99  | 99  | 0.26 | 0.29 | 0.56 | 0.14 | 0.07 | 0.18 | 0.07 |
|                                        |         | rs28912669 | C/T | Promoter | Y | 99  | 100 | 0.12 | 0.11 | 0.71 | 0.57 | 0.30 | 0.75 | 0.37 |
|                                        |         | rs17169194 | C/A | IVS      | N | -   | -   | -    | -    | -    | -    | -    | -    | -    |
|                                        | SERTAD1 | rs268687   | G/A | CDS      | N | -   | -   | -    | -    | -    | -    | -    | -    | -    |
|                                        |         | rs4150987  | G/A | 5'UTR    | N | -   | -   | -    | -    | -    | -    | -    | -    | -    |
|                                        | SKP2    | rs28362652 | C/T | Promoter | N | -   | -   | -    | -    | -    | -    | -    | -    | -    |
|                                        |         | rs28362653 | A/T | Promoter | N | -   | -   | -    | -    | -    | -    | -    | -    | -    |
|                                        | TFDP1   | None       | -   | -        | - | -   | -   | -    | -    | -    | -    | -    | -    | -    |
|                                        | TFDP2   | rs10935453 | A/C | Promoter | Y | 100 | 100 | 0.30 | 0.28 | 0.49 | 0.61 | 0.25 | 0.88 | 0.53 |
|                                        |         | rs2861422  | C/T | IVS      | Y | 99  | 100 | 0.30 | 0.28 | 0.55 | 0.70 | 0.85 | 0.32 | 0.56 |
|                                        |         | rs11569166 | T/A | Promoter | N | -   | -   | -    | -    | -    | -    | -    | -    | -    |
|                                        |         | rs11569171 | A/C | Promoter | N | -   | -   | -    | -    | -    | -    | -    | -    | -    |
|                                        | UBE1    | rs2070169  | A/G | IVS      | Y | 96  | 96  | 0.13 | 0.10 | 0.00 | -    | -    | -    | -    |
| DNA Damage Signaling Pathway<br>(n=65) | AIFM1   | rs209539   | A/G | Promoter | Y | 0   | 0   | -    | -    | -    | -    | -    | -    | -    |
|                                        | ANKRD17 | None       | -   | -        | - | -   | -   | -    | -    | -    | -    | -    | -    | -    |
|                                        | APEX1   | rs1130409  | G/T | CDS      | Y | 99  | 99  | 0.43 | 0.42 | 0.22 | 0.10 | 0.17 | 0.26 | 0.99 |
|                                        |         | rs3136814  | A/C | 5'UTR    | Y | 99  | 98  | 0.04 | 0.04 | 0.30 | -    | -    | -    | -    |
|                                        |         | rs17112002 | A/T | 3'UTR    | N | -   | -   | -    | -    | -    | -    | -    | -    | -    |
|                                        | APEX2   | None       | -   | -        | - | -   | -   | -    | -    | -    | -    | -    | -    | -    |
|                                        | ATRX    | rs3088074  | G/C | CDS      | N | -   | -   | -    | -    | -    | -    | -    | -    | -    |
|                                        | BTG2    | rs10920606 | C/T | Promoter | Y | 100 | 100 | 0.18 | 0.17 | 0.69 | 0.58 | 0.38 | 0.93 | 0.83 |
|                                        |         | rs4971234  | A/G | Promoter | Y | 97  | 99  | 0.18 | 0.16 | 0.74 | 0.51 | 0.66 | 0.16 | 0.17 |
|                                        | CCNU    | rs151203   | G/T | Promoter | Y | 99  | 99  | 0.41 | 0.42 | 0.12 | 0.31 | 0.52 | 0.23 | 0.64 |
|                                        |         | rs231623   | C/G | 5'UTR    | N | -   | -   | -    | -    | -    | -    | -    | -    | -    |
|                                        |         | rs163104   | A/C | Promoter | N | -   | -   | -    | -    | -    | -    | -    | -    | -    |
|                                        | CIB1    | rs8025979  | A/G | Promoter | Y | 89  | 88  | 0.11 | 0.10 | 0.32 | -    | -    | -    | -    |
|                                        |         | rs8028268  | G/A | Promoter | N | -   | -   | -    | -    | -    | -    | -    | -    | -    |
|                                        | CRY1    | rs3809236  | C/T | 5'UTR    | Y | 96  | 97  | 0.21 | 0.22 | 0.02 | -    | -    | -    | -    |
|                                        |         | rs3809235  | T/C | 5'UTR    | N | -   | -   | -    | -    | -    | -    | -    | -    | -    |
|                                        | DDB2    | rs4237547  | C/G | Promoter | N | -   | -   | -    | -    | -    | -    | -    | -    | -    |
|                                        |         | rs3758667  | G/A | Promoter | N | -   | -   | -    | -    | -    | -    | -    | -    | -    |
|                                        | ERCC1   | rs3212935  | A/G | IVS      | N | -   | -   | -    | -    | -    | -    | -    | -    | -    |
|                                        |         | rs3212929  | C/A | Promoter | N | -   | -   | -    | -    | -    | -    | -    | -    | -    |
|                                        |         | rs2298881  | C/A | Promoter | N | -   | -   | -    | -    | -    | -    | -    | -    | -    |
|                                        | ERCC2   | rs13181    | G/T | CDS      | Y | 96  | 99  | 0.07 | 0.05 | 0.84 | 0.34 | 0.91 | 0.17 | 0.20 |
|                                        |         | rs1799793  | A/G | CDS      | Y | 98  | 96  | 0.06 | 0.06 | 0.91 | 0.35 | 0.98 | 0.73 | 0.59 |
|                                        |         | rs3916788  | C/A | Promoter | N | -   | -   | -    | -    | -    | -    | -    | -    | -    |
|                                        | ERCC4   | rs3136038  | C/T | Promoter | Y | 100 | 100 | 0.27 | 0.26 | 0.06 | 0.02 | 0.61 | 0.02 | 0.58 |

|         |            |     |          |   |     |     |      |      |      |      |      |      |      |
|---------|------------|-----|----------|---|-----|-----|------|------|------|------|------|------|------|
| ERCC5   | rs6498486  | A/C | Promoter | Y | 97  | 95  | 0.27 | 0.27 | 0.00 | -    | -    | -    | -    |
|         | rs2296147  | C/T | 5'UTR    | Y | 100 | 100 | 0.20 | 0.19 | 0.78 | 0.48 | 0.87 | 0.33 | 0.37 |
|         | rs2094258  | G/A | Promoter | N | -   | -   | -    | -    | -    | -    | -    | -    | -    |
|         | rs17655    | G/C | CDS      | N | -   | -   | -    | -    | -    | -    | -    | -    | -    |
|         | rs4150247  | C/T | Promoter | N | -   | -   | -    | -    | -    | -    | -    | -    | -    |
|         | rs751402   | C/A | 5'UTR    | N | -   | -   | -    | -    | -    | -    | -    | -    | -    |
|         | rs873601   | A/G | 3'UTR    | N | -   | -   | -    | -    | -    | -    | -    | -    | -    |
| ERCC8   | rs1323697  | G/C | Promoter | N | -   | -   | -    | -    | -    | -    | -    | -    | -    |
|         | rs158919   | A/C | Promoter | Y | 100 | 100 | 0.08 | 0.07 | 0.20 | 0.22 | 0.17 | 0.34 | 0.24 |
|         | rs158920   | C/T | Promoter | Y | 100 | 100 | 0.14 | 0.13 | 0.53 | 0.76 | 0.48 | 0.77 | 0.47 |
|         | rs4647102  | A/G | 3'UTR    | Y | 100 | 100 | 0.08 | 0.07 | 0.20 | 0.22 | 0.34 | 0.17 | 0.24 |
|         | rs158921   | G/A | Promoter | N | -   | -   | -    | -    | -    | -    | -    | -    | -    |
|         | rs4647029  | C/A | Promoter | N | -   | -   | -    | -    | -    | -    | -    | -    | -    |
|         | rs4647036  | G/A | Promoter | N | -   | -   | -    | -    | -    | -    | -    | -    | -    |
| EXO1    | rs1047840  | A/G | CDS      | Y | 100 | 100 | 0.20 | 0.21 | 0.87 | 0.88 | 0.98 | 0.65 | 0.71 |
|         | rs1635518  | A/G | Promoter | N | -   | -   | -    | -    | -    | -    | -    | -    | -    |
|         | rs1776148  | A/G | CDS      | Y | 99  | 100 | 0.17 | 0.19 | 0.32 | 0.29 | 0.47 | 0.13 | 0.12 |
|         | rs1776178  | C/T | Promoter | Y | 96  | 100 | 0.23 | 0.22 | 0.80 | 0.75 | 0.40 | 0.98 | 0.48 |
|         | rs1776179  | A/G | Promoter | Y | 0   | 0   | -    | -    | -    | -    | -    | -    | -    |
|         | rs3754092  | G/T | Promoter | N | -   | -   | -    | -    | -    | -    | -    | -    | -    |
|         | rs4149963  | C/T | CDS      | N | -   | -   | -    | -    | -    | -    | -    | -    | -    |
|         | rs1635517  | G/A | 5'UTR    | N | -   | -   | -    | -    | -    | -    | -    | -    | -    |
|         | rs1776180  | G/C | Promoter | N | -   | -   | -    | -    | -    | -    | -    | -    | -    |
|         | rs9350     | C/T | CDS      | N | -   | -   | -    | -    | -    | -    | -    | -    | -    |
| FANCG   | rs17885617 | A/G | Promoter | Y | 100 | 100 | 0.40 | 0.38 | 0.68 | 0.52 | 0.27 | 0.52 | 0.30 |
|         | rs2237857  | A/G | CDS      | N | -   | -   | -    | -    | -    | -    | -    | -    | -    |
|         | rs10972302 | C/T | 5'UTR    | N | -   | -   | -    | -    | -    | -    | -    | -    | -    |
|         | rs10972303 | C/A | 5'UTR    | N | -   | -   | -    | -    | -    | -    | -    | -    | -    |
|         | rs17885140 | A/T | Promoter | N | -   | -   | -    | -    | -    | -    | -    | -    | -    |
| FEN1    | rs174538   | A/G | 5'UTR    | N | -   | -   | -    | -    | -    | -    | -    | -    |      |
| GADD45G | rs3138488  | A/G | Promoter | Y | 100 | 97  | 0.31 | 0.28 | 0.24 | 0.41 | 0.78 | 0.18 | 0.24 |
|         | rs3138489  | C/A | Promoter | N | -   | -   | -    | -    | -    | -    | -    | -    | -    |
|         | rs3138493  | C/A | Promoter | N | -   | -   | -    | -    | -    | -    | -    | -    | -    |
| GML     | rs3764795  | C/T | CDS      | N | -   | -   | -    | -    | -    | -    | -    | -    | -    |
|         | rs3750246  | C/T | IVS      | N | -   | -   | -    | -    | -    | -    | -    | -    | -    |
| IGHMBP2 | rs17612126 | A/C | CDS      | Y | 99  | 100 | 0.29 | 0.28 | 0.16 | 0.64 | 0.32 | 0.83 | 0.56 |
|         | rs2275996  | A/G | CDS      | Y | 99  | 100 | 0.10 | 0.10 | 0.46 | 0.12 | 0.09 | 0.58 | 0.90 |
|         | rs622082   | A/G | CDS      | N | -   | -   | -    | -    | -    | -    | -    | -    | -    |
| IHPK3   | rs560096   | C/T | CDS      | N | -   | -   | -    | -    | -    | -    | -    | -    | -    |
|         | rs12189725 | G/T | 5'UTR    | Y | 100 | 99  | 0.10 | 0.12 | 0.63 | 0.49 | 0.24 | 0.99 | 0.28 |
|         | rs16869463 | G/A | Promoter | N | -   | -   | -    | -    | -    | -    | -    | -    | -    |
|         | rs34343647 | G/T | CDS      | Y | 100 | 100 | 0.00 | 0.01 | 0.85 | -    | -    | -    | -    |

|        |            |     |          |   |     |     |      |      |      |      |      |      |      |   |
|--------|------------|-----|----------|---|-----|-----|------|------|------|------|------|------|------|---|
|        | rs4711343  | A/G | 5'UTR    | N | -   | -   | -    | -    | -    | -    | -    | -    | -    | - |
| INPPL1 | rs11548491 | C/G | CDS      | N | -   | -   | -    | -    | -    | -    | -    | -    | -    | - |
| LIG1   | rs439132   | A/G | IVS      | Y | 100 | 100 | 0.20 | 0.21 | 0.17 | 0.24 | 0.13 | 0.36 | 0.34 |   |
|        | rs2386521  | A/G | IVS      | Y | 0   | 0   | -    | -    | -    | -    | -    | -    | -    | - |
| LIG3   | rs12945428 | G/A | 5'UTR    | N | -   | -   | -    | -    | -    | -    | -    | -    | -    | - |
|        | rs4796030  | C/A | IVS      | N | -   | -   | -    | -    | -    | -    | -    | -    | -    | - |
| LIG4   | rs2232641  | A/G | CDS      | Y | 100 | 100 | 0.02 | 0.03 | 0.45 | -    | -    | -    | -    | - |
|        | rs1805388  | G/A | CDS      | N | -   | -   | -    | -    | -    | -    | -    | -    | -    | - |
| MAPK12 | rs12484714 | C/T | Promoter | N | -   | -   | -    | -    | -    | -    | -    | -    | -    | - |
| MBD4   | rs3138323  | C/G | Promoter | Y | 100 | 100 | 0.06 | 0.06 | 0.05 | 0.08 | 0.91 | 0.98 | 0.59 |   |
|        | rs3138331  | C/T | Promoter | Y | 100 | 100 | 0.06 | 0.06 | 0.05 | 0.08 | -    | -    | -    | - |
|        | rs140693   | T/C | CDS      | N | -   | -   | -    | -    | -    | -    | -    | -    | -    | - |
| MLH1   | rs1800734  | G/A | Promoter | N | -   | -   | -    | -    | -    | -    | -    | -    | -    | - |
|        | rs1799977  | A/G | 5'UTR    | N | -   | -   | -    | -    | -    | -    | -    | -    | -    | - |
| MLH3   | rs17102999 | A/G | CDS      | Y | 99  | 100 | 0.08 | 0.07 | 0.50 | 0.67 | 0.97 | 0.35 | 0.36 |   |
|        | rs175080   | A/G | CDS      | N | -   | -   | -    | -    | -    | -    | -    | -    | -    | - |
|        | rs175084   | C/T | Promoter | N | -   | -   | -    | -    | -    | -    | -    | -    | -    | - |
| MPG    | rs710079   | C/T | 5'UTR    | Y | 94  | 99  | 0.15 | 0.14 | 0.70 | -    | -    | -    | -    | - |
| MSH2   | rs3732183  | A/G | IVS      | Y | 81  | 84  | 0.43 | 0.40 | 0.80 | -    | -    | -    | -    | - |
|        | rs1863332  | A/C | Promoter | Y | 96  | 94  | 0.16 | 0.17 | 0.11 | -    | -    | -    | -    | - |
|        | rs1863333  | A/G | Promoter | Y | 0   | 0   | -    | -    | -    | -    | -    | -    | -    | - |
|        | rs2303425  | C/T | Promoter | Y | 95  | 98  | 0.19 | 0.17 | 0.23 | 0.41 | 0.98 | 0.15 | 0.19 |   |
|        | rs6757310  | C/G | Promoter | N | -   | -   | -    | -    | -    | -    | -    | -    | -    | - |
|        | rs2303426  | G/C | IVS      | N | -   | -   | -    | -    | -    | -    | -    | -    | -    | - |
| MSH3   | rs10168    | A/G | 5'UTR    | N | -   | -   | -    | -    | -    | -    | -    | -    | -    | - |
|        | rs380691   | C/T | Promoter | Y | 100 | 100 | 0.41 | 0.43 | 0.18 | 0.70 | 0.40 | 0.47 | 0.33 |   |
|        | rs26279    | A/G | CDS      | Y | 100 | 100 | 0.29 | 0.27 | 0.75 | 0.43 | 0.22 | 0.83 | 0.38 |   |
|        | rs1105524  | G/A | 5'UTR    | N | -   | -   | -    | -    | -    | -    | -    | -    | -    | - |
|        | rs1650697  | G/A | 5'UTR    | N | -   | -   | -    | -    | -    | -    | -    | -    | -    | - |
|        | rs2250063  | C/T | 5'UTR    | N | -   | -   | -    | -    | -    | -    | -    | -    | -    | - |
| MSH4   | rs1493367  | A/C | IVS      | N | -   | -   | -    | -    | -    | -    | -    | -    | -    | - |
| MSH5   | rs1802127  | C/T | CDS      | Y | 100 | 100 | 0.00 | 0.00 | -    | -    | -    | -    | -    | - |
|        | rs2075789  | T/C | CDS      | N | -   | -   | -    | -    | -    | -    | -    | -    | -    | - |
| MSH6   | rs1042821  | G/A | CDS      | N | -   | -   | -    | -    | -    | -    | -    | -    | -    | - |
| MUTYH  | rs3219463  | A/G | Promoter | Y | 100 | 100 | 0.32 | 0.30 | 0.43 | 0.21 | 1.00 | 0.11 | 0.22 |   |
|        | rs3219489  | G/C | CDS      | N | -   | -   | -    | -    | -    | -    | -    | -    | -    | - |
| N4BP2  | rs1706023  | C/T | Promoter | Y | 100 | 100 | 0.14 | 0.13 | 0.13 | 0.02 | 0.74 | 0.01 | 0.60 |   |
|        | rs2271395  | G/A | CDS      | N | -   | -   | -    | -    | -    | -    | -    | -    | -    | - |
| OGG1   | rs1052133  | C/G | 3'UTR    | N | -   | -   | -    | -    | -    | -    | -    | -    | -    | - |
| PMS1   | rs5742932  | G/T | Promoter | N | -   | -   | -    | -    | -    | -    | -    | -    | -    | - |
|        | rs5742933  | G/C | Promoter | N | -   | -   | -    | -    | -    | -    | -    | -    | -    | - |
| PMS2   | rs2302336  | C/T | Promoter | Y | 97  | 90  | 0.38 | 0.36 | 0.52 | -    | -    | -    | -    | - |



|  |          |            |     |          |   |     |     |      |      |      |      |      |      |      |
|--|----------|------------|-----|----------|---|-----|-----|------|------|------|------|------|------|------|
|  |          | rs3176623  | C/A | Promoter | N | -   | -   | -    | -    | -    | -    | -    | -    | -    |
|  |          | rs3176624  | G/C | Promoter | N | -   | -   | -    | -    | -    | -    | -    | -    | -    |
|  | XPC      | rs2228001  | A/C | CDS      | Y | 99  | 99  | 0.37 | 0.37 | 0.16 | 0.02 | 0.10 | 0.09 | 0.77 |
|  |          | rs3731054  | G/C | Promoter | Y | 100 | 99  | 0.27 | 0.32 | 0.46 | 0.03 | 0.11 | 0.01 | 0.02 |
|  |          | rs3731055  | G/A | IVS      | N | -   | -   | -    | -    | -    | -    | -    | -    | -    |
|  |          | rs1870134  | G/C | Promoter | N | -   | -   | -    | -    | -    | -    | -    | -    | -    |
|  |          | rs2229090  | C/G | 3'UTR    | N | -   | -   | -    | -    | -    | -    | -    | -    | -    |
|  | XRCC1    | rs25489    | T/C | CDS      | N | -   | -   | -    | -    | -    | -    | -    | -    | -    |
|  |          | rs25487    | T/C | CDS      | N | -   | -   | -    | -    | -    | -    | -    | -    | -    |
|  |          | rs1799782  | G/A | CDS      | N | -   | -   | -    | -    | -    | -    | -    | -    | -    |
|  |          | rs3213245  | G/A | 5'UTR    | N | -   | -   | -    | -    | -    | -    | -    | -    | -    |
|  | XRCC2    | rs3218370  | G/C | Promoter | N | -   | -   | -    | -    | -    | -    | -    | -    | -    |
|  |          | rs3218374  | C/G | Promoter | N | -   | -   | -    | -    | -    | -    | -    | -    | -    |
|  |          | rs3218384  | G/C | Promoter | N | -   | -   | -    | -    | -    | -    | -    | -    | -    |
|  | XRCC3    | rs861539   | G/A | IVS      | N | -   | -   | -    | -    | -    | -    | -    | -    | -    |
|  |          | rs1799794  | A/G | 5'UTR    | N | -   | -   | -    | -    | -    | -    | -    | -    | -    |
|  | XRCC4    | rs16900150 | A/G | Promoter | Y | 97  | 97  | 0.07 | 0.06 | 0.82 | 0.22 | 0.98 | 0.33 | 0.42 |
|  |          | rs1993947  | C/G | Promoter | Y | 100 | 100 | 0.07 | 0.07 | 0.82 | 0.71 | 0.44 | 0.71 | 0.42 |
|  |          | rs2075685  | G/T | Promoter | Y | 100 | 100 | 0.17 | 0.16 | 0.71 | 0.66 | 0.39 | 0.93 | 0.43 |
|  |          | rs2075686  | C/T | Promoter | Y | 100 | 100 | 0.37 | 0.35 | 0.71 | 0.44 | 0.36 | 0.21 | 0.20 |
|  |          | rs1993948  | A/T | IVS      | N | -   | -   | -    | -    | -    | -    | -    | -    | -    |
|  |          | rs3734091  | T/G | CDS      | N | -   | -   | -    | -    | -    | -    | -    | -    | -    |
|  | XRCC5    | rs1647764  | C/A | Promoter | N | -   | -   | -    | -    | -    | -    | -    | -    | -    |
|  |          | rs2372767  | C/G | Promoter | N | -   | -   | -    | -    | -    | -    | -    | -    | -    |
|  | XRCC6    | rs12485198 | C/G | Promoter | Y | 95  | 94  | 0.50 | 0.50 | 0.00 | -    | -    | -    | -    |
|  |          | rs2267437  | C/G | IVS      | N | -   | -   | -    | -    | -    | -    | -    | -    | -    |
|  |          | rs28384707 | C/A | Promoter | N | -   | -   | -    | -    | -    | -    | -    | -    | -    |
|  | XRCC6BP1 | rs3751325  | A/T | CDS      | Y | 100 | 99  | 0.31 | 0.29 | 0.77 | 0.48 | 0.38 | 0.88 | 0.54 |
|  |          | rs4590915  | G/A | Promoter | N | -   | -   | -    | -    | -    | -    | -    | -    | -    |
|  | ZAK      | rs3769148  | A/G | CDS      | Y | 100 | 100 | 0.22 | 0.20 | 0.81 | 0.54 | 0.36 | 0.47 | 0.35 |
|  | C17ORF70 | rs34592766 | A/T | 5'UTR    | Y | 0   | 0   | -    | -    | -    | -    | -    | -    | -    |
|  |          | rs14422    | C/T | CDS      | N | -   | -   | -    | -    | -    | -    | -    | -    | -    |
|  | FANCB    | rs2188383  | C/G | 5'UTR    | Y | 99  | 100 | 0.17 | 0.15 | 0.00 | -    | -    | -    | -    |
|  |          | rs2285490  | G/T | Promoter | Y | 100 | 100 | 0.18 | 0.15 | 0.00 | -    | -    | -    | -    |
|  | FANCM    | rs1367580  | G/T | CDS      | Y | 83  | 86  | 0.17 | 0.17 | 0.15 | -    | -    | -    | -    |
|  |          | rs3736772  | C/G | CDS      | Y | 0   | 0   | -    | -    | -    | -    | -    | -    | -    |
|  |          | rs3825625  | A/G | Promoter | Y | 100 | 100 | 0.13 | 0.15 | 0.47 | 0.29 | 0.81 | 0.16 | 0.19 |
|  | MDC1     | rs2075015  | T/C | CDS      | N | -   | -   | -    | -    | -    | -    | -    | -    | -    |
|  |          | rs9262152  | C/T | CDS      | Y | 99  | 100 | 0.04 | 0.05 | 0.71 | -    | -    | -    | -    |
|  |          | rs17292678 | T/C | CDS      | N | -   | -   | -    | -    | -    | -    | -    | -    | -    |
|  |          | rs3130645  | A/G | CDS      | N | -   | -   | -    | -    | -    | -    | -    | -    | -    |
|  |          | rs9461623  | A/G | CDS      | N | -   | -   | -    | -    | -    | -    | -    | -    | -    |

DNA Repair Gene  
(n=9)

Drug Xeno Gene  
(n=73)

|         |            |     |          |   |     |     |      |      |      |      |      |      |      |
|---------|------------|-----|----------|---|-----|-----|------|------|------|------|------|------|------|
| MMRN1   | rs12646270 | A/G | CDS      | Y | 99  | 100 | 0.27 | 0.28 | 0.06 | 0.86 | 0.44 | 0.74 | 0.55 |
|         | rs1442140  | C/T | Promoter | Y | 100 | 100 | 0.22 | 0.21 | 0.56 | 0.45 | 0.52 | 0.24 | 0.33 |
|         | rs1442141  | G/T | Promoter | Y | 100 | 100 | 0.27 | 0.27 | 0.02 | -    | -    | -    | -    |
| MMRN2   | rs34587013 | G/C | CDS      | N | -   | -   | -    | -    | -    | -    | -    | -    | -    |
|         | rs36073867 | C/G | CDS      | Y | 99  | 98  | 0.00 | 0.00 | 0.98 | -    | -    | -    | -    |
|         | rs3793899  | G/T | Promoter | N | -   | -   | -    | -    | -    | -    | -    | -    | -    |
| PARP2   | rs3793900  | A/C | Promoter | N | -   | -   | -    | -    | -    | -    | -    | -    | -    |
|         | rs3093872  | C/T | Promoter | Y | 91  | 92  | 0.09 | 0.08 | 0.79 | -    | -    | -    | -    |
|         | rs3093873  | C/T | Promoter | Y | 100 | 100 | 0.15 | 0.19 | 0.24 | 0.04 | 0.01 | 0.07 | 0.01 |
|         | rs3093870  | C/T | Promoter | N | -   | -   | -    | -    | -    | -    | -    | -    | -    |
| USP1    | rs3093878  | C/T | Promoter | N | -   | -   | -    | -    | -    | -    | -    | -    | -    |
|         | rs626787   | C/G | Promoter | Y | 100 | 100 | 0.22 | 0.23 | 0.70 | 0.87 | 0.95 | 0.67 | 0.83 |
|         | rs646179   | G/A | IVS      | N | -   | -   | -    | -    | -    | -    | -    | -    | -    |
| ZBTB32  | rs2234360  | C/T | Promoter | Y | 0   | 0   | -    | -    | -    | -    | -    | -    | -    |
| AADAC   | rs2293004  | A/G | 5'UTR    | Y | 99  | 100 | 0.35 | 0.34 | 0.13 | 0.48 | 0.52 | 0.34 | 0.70 |
|         | rs2293005  | C/T | Promoter | Y | 0   | 0   | -    | -    | -    | -    | -    | -    | -    |
|         | rs1803155  | A/G | CDS      | N | -   | -   | -    | -    | -    | -    | -    | -    | -    |
|         | rs1042201  | G/A | 3'UTR    | N | -   | -   | -    | -    | -    | -    | -    | -    | -    |
| ADH1A   | rs13134764 | A/T | Promoter | N | -   | -   | -    | -    | -    | -    | -    | -    | -    |
|         | rs4147531  | C/T | Promoter | Y | 98  | 99  | 0.13 | 0.11 | 0.60 | 0.47 | 0.23 | 0.92 | 0.27 |
| ADH4    | rs1800759  | A/C | Promoter | Y | 100 | 100 | 0.20 | 0.18 | 0.13 | 0.70 | 0.52 | 0.48 | 0.41 |
|         | rs1800760  | A/T | Promoter | Y | 84  | 90  | 0.08 | 0.09 | 0.67 | -    | -    | -    | -    |
|         | rs4148883  | A/G | Promoter | Y | 99  | 99  | 0.28 | 0.28 | 0.87 | 0.57 | 0.78 | 0.32 | 0.84 |
|         | rs4148884  | A/G | Promoter | Y | 0   | 0   | -    | -    | -    | -    | -    | -    | -    |
|         | rs4140388  | C/G | Promoter | N | -   | -   | -    | -    | -    | -    | -    | -    | -    |
| ADH6    | rs34582580 | G/T | CDS      | Y | 100 | 100 | 0.00 | 0.00 | -    | -    | -    | -    | -    |
|         | rs13104485 | A/T | Promoter | N | -   | -   | -    | -    | -    | -    | -    | -    | -    |
| ADHFE1  | rs4737227  | G/T | Promoter | Y | 0   | 0   | -    | -    | -    | -    | -    | -    | -    |
|         | rs1060242  | C/T | CDS      | N | -   | -   | -    | -    | -    | -    | -    | -    | -    |
| AKR1C4  | rs17134592 | C/G | CDS      | N | -   | -   | -    | -    | -    | -    | -    | -    | -    |
|         | rs3829125  | G/C | CDS      | N | -   | -   | -    | -    | -    | -    | -    | -    | -    |
| ALDH1A2 | rs4646549  | C/G | Promoter | Y | 99  | 97  | 0.28 | 0.27 | 0.63 | 0.81 | 0.63 | 0.87 | 0.76 |
|         | rs4646583  | C/T | IVS      | Y | 97  | 98  | 0.12 | 0.11 | 0.81 | 0.54 | 0.31 | 0.85 | 0.38 |
|         | rs4646626  | T/C | CDS      | N | -   | -   | -    | -    | -    | -    | -    | -    | -    |
| ALDH1A3 | rs3803430  | C/T | CDS      | Y | 99  | 100 | 0.06 | 0.05 | 0.65 | 0.36 | -    | -    | -    |
|         | rs3809524  | A/G | Promoter | Y | 94  | 93  | 0.11 | 0.09 | 0.64 | -    | -    | -    | -    |
| ALDH1B1 | rs2073478  | G/T | CDS      | Y | 94  | 93  | 0.25 | 0.29 | 0.23 | -    | -    | -    | -    |
|         | rs3043     | C/G | 3'UTR    | Y | 100 | 100 | 0.31 | 0.33 | 0.44 | 0.28 | 0.56 | 0.06 | 0.20 |
|         | rs4878802  | C/G | Promoter | Y | 99  | 99  | 0.26 | 0.26 | 0.43 | 0.15 | 0.61 | 0.13 | 0.83 |
|         | rs4878803  | A/T | Promoter | Y | 88  | 91  | 0.27 | 0.28 | 0.01 | -    | -    | -    | -    |
|         | rs7040397  | A/G | Promoter | Y | 97  | 97  | 0.26 | 0.25 | 0.75 | 0.22 | 0.72 | 0.18 | 0.78 |
| ALDH3B1 | rs2010404  | G/T | Promoter | Y | 95  | 95  | 0.20 | 0.18 | 0.65 | -    | -    | -    | -    |



|         |            |     |          |   |     |     |      |      |      |      |      |      |      |
|---------|------------|-----|----------|---|-----|-----|------|------|------|------|------|------|------|
|         | rs308337   | A/C | Promoter | Y | 96  | 96  | 0.01 | 0.01 | 0.72 | -    | -    | -    | -    |
| ALDH3B2 | rs1551886  | C/T | CDS      | Y | 100 | 100 | 0.07 | 0.07 | 0.55 | 0.85 | 0.56 | 0.97 | 0.58 |
|         | rs11603033 | A/G | Promoter | N | -   | -   | -    | -    | -    | -    | -    | -    | -    |
| ALDH4A1 | rs2230709  | T/C | CDS      | N | -   | -   | -    | -    | -    | -    | -    | -    | -    |
| ALDH5A1 | rs16889393 | G/A | Promoter | Y | 99  | 97  | 0.12 | 0.09 | 0.14 | 0.03 | 0.22 | 0.01 | 0.07 |
|         | rs2744574  | T/C | Promoter | Y | 99  | 99  | 0.10 | 0.08 | 0.40 | 0.05 | 0.09 | 0.09 | 0.05 |
|         | rs2760118  | T/C | CDS      | N | -   | -   | -    | -    | -    | -    | -    | -    | -    |
|         | rs3765310  | C/T | CDS      | N | -   | -   | -    | -    | -    | -    | -    | -    | -    |
| ALDH6A1 | rs1984511  | C/T | Promoter | Y | 100 | 100 | 0.11 | 0.11 | 0.44 | 0.45 | 0.71 | 0.37 | 0.90 |
|         | rs2006731  | T/A | Promoter | N | -   | -   | -    | -    | -    | -    | -    | -    | -    |
|         | rs2006732  | A/C | Promoter | N | -   | -   | -    | -    | -    | -    | -    | -    | -    |
| ALDH7A1 | rs12514417 | G/T | CDS      | Y | 100 | 100 | 0.09 | 0.11 | 0.54 | 0.26 | 0.33 | 0.15 | 0.12 |
|         | rs3736174  | G/C | Promoter | N | -   | -   | -    | -    | -    | -    | -    | -    | -    |
|         | rs2775     | A/G | 3'UTR    | N | -   | -   | -    | -    | -    | -    | -    | -    | -    |
| ALDH8A1 | rs4646870  | G/T | Promoter | Y | 90  | 90  | 0.31 | 0.30 | 0.05 | -    | -    | -    | -    |
|         | rs4646868  | G/A | Promoter | N | -   | -   | -    | -    | -    | -    | -    | -    | -    |
| ALDH9A1 | rs4657468  | G/T | Promoter | Y | 100 | 100 | 0.42 | 0.41 | 0.33 | 0.50 | 0.87 | 0.29 | 0.64 |
| CEL     | rs668809   | G/A | Promoter | N | -   | -   | -    | -    | -    | -    | -    | -    | -    |
| CYP11B1 | rs4541     | G/A | CDS      | N | -   | -   | -    | -    | -    | -    | -    | -    | -    |
|         | rs5288     | C/A | CDS      | N | -   | -   | -    | -    | -    | -    | -    | -    | -    |
|         | rs5294     | G/A | IVS      | N | -   | -   | -    | -    | -    | -    | -    | -    | -    |
| CYP11B2 | rs11781082 | A/G | Promoter | Y | 96  | 97  | 0.09 | 0.10 | 0.69 | 0.76 | 0.69 | 0.77 | 0.72 |
|         | rs1799998  | C/T | Promoter | Y | 92  | 95  | 0.32 | 0.31 | 0.58 | -    | -    | -    | -    |
|         | rs3097     | A/G | 3'UTR    | Y | 85  | 94  | 0.19 | 0.14 | 0.00 | -    | -    | -    | -    |
|         | rs5305     | A/G | Promoter | Y | 99  | 99  | 0.00 | 0.00 | -    | -    | -    | -    | -    |
|         | rs4545     | T/C | CDS      | N | -   | -   | -    | -    | -    | -    | -    | -    | -    |
|         | rs5312     | T/A | CDS      | N | -   | -   | -    | -    | -    | -    | -    | -    | -    |
| CYP1A1  | rs4646422  | T/C | CDS      | N | -   | -   | -    | -    | -    | -    | -    | -    | -    |
|         | rs1048943  | T/C | CDS      | N | -   | -   | -    | -    | -    | -    | -    | -    | -    |
| CYP1B1  | rs1056836  | C/G | CDS      | Y | 100 | 100 | 0.10 | 0.12 | 0.02 | -    | -    | -    | -    |
|         | rs162558   | C/T | Promoter | N | -   | -   | -    | -    | -    | -    | -    | -    | -    |
|         | rs2567206  | A/G | Promoter | Y | 88  | 90  | 0.14 | 0.17 | 0.51 | -    | -    | -    | -    |
|         | rs10012    | G/C | CDS      | N | -   | -   | -    | -    | -    | -    | -    | -    | -    |
|         | rs2567207  | A/G | Promoter | N | -   | -   | -    | -    | -    | -    | -    | -    | -    |
|         | rs2855655  | G/A | Promoter | N | -   | -   | -    | -    | -    | -    | -    | -    | -    |
| CYP21A2 | rs396458   | G/A | Promoter | N | -   | -   | -    | -    | -    | -    | -    | -    | -    |
|         | rs431204   | T/C | Promoter | N | -   | -   | -    | -    | -    | -    | -    | -    | -    |
|         | rs1058152  | T/C | 3'UTR    | N | -   | -   | -    | -    | -    | -    | -    | -    | -    |
|         | rs34607927 | A/T | CDS      | N | -   | -   | -    | -    | -    | -    | -    | -    | -    |
| CYP26B1 | rs2241057  | G/A | CDS      | N | -   | -   | -    | -    | -    | -    | -    | -    | -    |
|         | rs2241059  | G/A | 3'UTR    | N | -   | -   | -    | -    | -    | -    | -    | -    | -    |
|         | rs2286965  | A/G | CDS      | Y | 80  | 90  | 0.05 | 0.07 | 0.81 | -    | -    | -    | -    |

|         |            |     |          |   |     |     |      |      |      |      |      |      |      |   |
|---------|------------|-----|----------|---|-----|-----|------|------|------|------|------|------|------|---|
|         | rs7568553  | C/G | CDS      | N | -   | -   | -    | -    | -    | -    | -    | -    | -    | - |
| CYP2C18 | rs17110192 | C/G | Promoter | Y | 100 | 100 | 0.06 | 0.04 | 0.88 | -    | -    | -    | -    | - |
|         | rs2281891  | A/G | CDS      | Y | 100 | 100 | 0.28 | 0.29 | 0.97 | 0.78 | 0.60 | 0.50 | 0.45 |   |
|         | rs2860840  | C/T | 3'UTR    | Y | 100 | 100 | 0.19 | 0.18 | 0.33 | 0.70 | 0.92 | 0.44 | 0.74 |   |
| CYP2D6  | rs1058164  | G/C | IVS      | N | -   | -   | -    | -    | -    | -    | -    | -    | -    |   |
|         | rs1058172  | T/C | CDS      | N | -   | -   | -    | -    | -    | -    | -    | -    | -    |   |
|         | rs17002853 | G/A | CDS      | N | -   | -   | -    | -    | -    | -    | -    | -    | -    |   |
|         | rs3915951  | C/A | CDS      | N | -   | -   | -    | -    | -    | -    | -    | -    | -    |   |
| CYP2E1  | rs2031920  | C/T | Promoter | Y | 99  | 100 | 0.19 | 0.21 | 0.12 | 0.50 | 0.21 | 0.65 | 0.22 |   |
|         | rs2031921  | C/T | Promoter | Y | 92  | 95  | 0.18 | 0.21 | 0.18 | -    | -    | -    | -    |   |
|         | rs2031922  | C/T | Promoter | Y | 100 | 100 | 0.19 | 0.21 | 0.11 | 0.37 | 0.64 | 0.14 | 0.15 |   |
|         | rs8192766  | G/T | Promoter | N | -   | -   | -    | -    | -    | -    | -    | -    | -    |   |
|         | rs2070672  | A/G | Promoter | N | -   | -   | -    | -    | -    | -    | -    | -    | -    |   |
|         | rs2480257  | A/T | 3'UTR    | N | -   | -   | -    | -    | -    | -    | -    | -    | -    |   |
|         | rs2480256  | G/A | 3'UTR    | N | -   | -   | -    | -    | -    | -    | -    | -    | -    |   |
| CYP2R1  | rs10741657 | G/A | Promoter | Y | 100 | 100 | 0.41 | 0.39 | 0.16 | 0.04 | 0.72 | 0.01 | 0.27 |   |
| CYP2S1  | rs338583   | C/T | 3'UTR    | Y | 96  | 96  | 0.19 | 0.21 | 0.05 | 0.11 | 0.94 | 0.05 | 0.09 |   |
|         | rs3810171  | C/T | Promoter | N | -   | -   | -    | -    | -    | -    | -    | -    | -    |   |
| CYP2W1  | rs12701220 | C/T | Promoter | N | -   | -   | -    | -    | -    | -    | -    | -    | -    |   |
| CYP3A7  | rs12360    | G/A | 3'UTR    | N | -   | -   | -    | -    | -    | -    | -    | -    | -    |   |
| CYP4A11 | rs9332978  | T/C | Promoter | N | -   | -   | -    | -    | -    | -    | -    | -    | -    |   |
|         | rs1126742  | G/A | CDS      | N | -   | -   | -    | -    | -    | -    | -    | -    | -    |   |
| CYP4A22 | rs7526026  | G/C | Promoter | N | -   | -   | -    | -    | -    | -    | -    | -    | -    |   |
|         | rs2056900  | G/A | CDS      | N | -   | -   | -    | -    | -    | -    | -    | -    | -    |   |
| CYP4B1  | rs2297813  | A/C | Promoter | Y | 100 | 100 | 0.21 | 0.21 | 0.15 | 0.93 | 0.75 | 0.91 | 0.83 |   |
|         | rs3766195  | C/T | 3'UTR    | Y | 87  | 81  | 0.15 | 0.22 | 0.38 | -    | -    | -    | -    |   |
|         | rs3766196  | C/A | 3'UTR    | N | -   | -   | -    | -    | -    | -    | -    | -    | -    |   |
|         | rs4646487  | C/T | CDS      | Y | 100 | 100 | 0.15 | 0.18 | 0.24 | 0.08 | 0.09 | 0.04 | 0.03 |   |
|         | rs632233   | A/G | Promoter | Y | 99  | 98  | 0.26 | 0.28 | 0.91 | 0.30 | 0.43 | 0.16 | 0.22 |   |
|         | rs632645   | G/A | Promoter | N | -   | -   | -    | -    | -    | -    | -    | -    | -    |   |
|         | rs2297809  | T/C | CDS      | N | -   | -   | -    | -    | -    | -    | -    | -    | -    |   |
|         | rs2297810  | G/A | CDS      | N | -   | -   | -    | -    | -    | -    | -    | -    | -    |   |
| CYP4F2  | rs2108622  | C/T | CDS      | Y | 100 | 99  | 0.33 | 0.33 | 0.41 | 0.92 | 0.78 | 0.80 | 0.93 |   |
|         | rs3093086  | A/T | Promoter | Y | 100 | 99  | 0.14 | 0.12 | 0.28 | 0.39 | 0.16 | 0.35 | 0.13 |   |
|         | rs3093089  | C/T | Promoter | Y | 0   | 0   | -    | -    | -    | -    | -    | -    | -    |   |
|         | rs3093085  | C/A | Promoter | N | -   | -   | -    | -    | -    | -    | -    | -    | -    |   |
|         | rs3093090  | C/A | Promoter | N | -   | -   | -    | -    | -    | -    | -    | -    | -    |   |
|         | rs3093091  | G/A | Promoter | N | -   | -   | -    | -    | -    | -    | -    | -    | -    |   |
|         | rs3093092  | C/A | Promoter | N | -   | -   | -    | -    | -    | -    | -    | -    | -    |   |
| CYP4F3  | rs1159776  | A/G | Promoter | Y | 100 | 100 | 0.19 | 0.19 | 0.20 | 0.94 | 0.75 | 0.98 | 0.77 |   |
|         | rs35888783 | A/G | CDS      | N | -   | -   | -    | -    | -    | -    | -    | -    | -    |   |
|         | rs3794987  | C/T | Promoter | Y | 100 | 100 | 0.26 | 0.24 | 0.33 | 0.35 | 0.21 | 0.26 | 0.16 |   |



|          |            |     |          |   |     |     |      |      |      |      |      |      |      |
|----------|------------|-----|----------|---|-----|-----|------|------|------|------|------|------|------|
| GSTA3    | rs597169   | G/T | Promoter | Y | 99  | 100 | 0.34 | 0.38 | 0.18 | 0.04 | 0.01 | 0.59 | 0.03 |
| GSTA4    | rs16883343 | C/T | Promoter | Y | 100 | 100 | 0.14 | 0.13 | 0.72 | 0.66 | 0.71 | 0.35 | 0.55 |
|          | rs3756979  | A/C | Promoter | Y | 100 | 100 | 0.08 | 0.05 | 0.90 | 0.10 | 0.05 | 0.66 | 0.06 |
| GSTA5    | rs2397118  | C/T | CDS      | Y | 90  | 90  | 0.16 | 0.17 | 0.45 | -    | -    | -    | -    |
| GSTM1    | rs412302   | G/A | Promoter | N | -   | -   | -    | -    | -    | -    | -    | -    | -    |
|          | rs412543   | G/C | Promoter | N | -   | -   | -    | -    | -    | -    | -    | -    | -    |
|          | rs17036148 | C/G | 5'UTR    | N | -   | -   | -    | -    | -    | -    | -    | -    | -    |
| GSTM2    | rs638820   | C/T | Promoter | Y | 100 | 100 | 0.27 | 0.27 | 0.46 | 0.96 | 0.92 | 0.90 | 0.95 |
| GSTM5    | rs11101989 | A/C | Promoter | Y | 100 | 98  | 0.32 | 0.36 | 0.00 | -    | -    | -    | -    |
|          | rs1633365  | T/C | Promoter | N | -   | -   | -    | -    | -    | -    | -    | -    | -    |
|          | rs414673   | T/C | Promoter | N | -   | -   | -    | -    | -    | -    | -    | -    | -    |
|          | rs674787   | T/C | Promoter | N | -   | -   | -    | -    | -    | -    | -    | -    | -    |
|          | rs1296954  | T/C | Promoter | N | -   | -   | -    | -    | -    | -    | -    | -    | -    |
| GSTO1    | rs11191975 | A/G | IVS      | N | -   | -   | -    | -    | -    | -    | -    | -    | -    |
|          | rs17878943 | G/C | 3'UTR    | N | -   | -   | -    | -    | -    | -    | -    | -    | -    |
|          | rs2164624  | A/G | Promoter | Y | 0   | 0   | -    | -    | -    | -    | -    | -    | -    |
| GSTP1    | rs17593068 | G/T | Promoter | N | -   | -   | -    | -    | -    | -    | -    | -    | -    |
|          | rs6591256  | A/G | Promoter | Y | 98  | 95  | 0.17 | 0.18 | 0.14 | 0.87 | 0.81 | 0.74 | 0.90 |
|          | rs1695     | A/G | CDS      | N | -   | -   | -    | -    | -    | -    | -    | -    | -    |
|          | rs643318   | G/C | Promoter | N | -   | -   | -    | -    | -    | -    | -    | -    | -    |
|          | rs694746   | C/G | Promoter | N | -   | -   | -    | -    | -    | -    | -    | -    | -    |
|          | rs8191438  | C/G | 5'UTR    | N | -   | -   | -    | -    | -    | -    | -    | -    | -    |
|          | rs643317   | T/C | Promoter | N | -   | -   | -    | -    | -    | -    | -    | -    | -    |
| GSTT1    | rs4630     | G/A | 3'UTR    | N | -   | -   | -    | -    | -    | -    | -    | -    | -    |
|          | rs6004035  | C/T | Promoter | N | -   | -   | -    | -    | -    | -    | -    | -    | -    |
| GSTZ1    | rs7975     | A/G | IVS      | Y | 94  | 94  | 0.48 | 0.47 | 0.15 | -    | -    | -    | -    |
|          | rs8177535  | C/T | Promoter | N | -   | -   | -    | -    | -    | -    | -    | -    | -    |
|          | rs731346   | G/A | IVS      | N | -   | -   | -    | -    | -    | -    | -    | -    | -    |
|          | rs2363643  | G/A | IVS      | N | -   | -   | -    | -    | -    | -    | -    | -    | -    |
|          | rs7160195  | G/A | Promoter | N | -   | -   | -    | -    | -    | -    | -    | -    | -    |
|          | rs3087524  | G/A | 5'UTR    | N | -   | -   | -    | -    | -    | -    | -    | -    | -    |
|          | rs3177427  | G/A | CDS      | N | -   | -   | -    | -    | -    | -    | -    | -    | -    |
| GZMB     | rs2236337  | C/T | 3'UTR    | Y | 100 | 100 | 0.22 | 0.19 | 0.34 | 0.11 | 0.98 | 0.03 | 0.07 |
|          | rs7144366  | C/T | Promoter | N | -   | -   | -    | -    | -    | -    | -    | -    | -    |
|          | rs11539752 | G/C | CDS      | N | -   | -   | -    | -    | -    | -    | -    | -    | -    |
|          | rs2273844  | A/G | 5'UTR    | N | -   | -   | -    | -    | -    | -    | -    | -    | -    |
| HSD17B10 | rs1264014  | G/C | Promoter | N | -   | -   | -    | -    | -    | -    | -    | -    |      |
| MGST2    | rs2132845  | A/T | 5'UTR    | Y | 100 | 100 | 0.18 | 0.20 | 0.06 | 0.23 | 0.43 | 0.21 | 0.40 |
|          | rs8192002  | A/C | Promoter | Y | 99  | 100 | 0.20 | 0.22 | 0.77 | 0.29 | 0.64 | 0.13 | 0.35 |
|          | rs8192004  | A/C | Promoter | Y | 98  | 100 | 0.31 | 0.30 | 0.42 | 0.80 | 0.54 | 0.72 | 0.58 |
|          | rs795600   | A/G | Promoter | N | -   | -   | -    | -    | -    | -    | -    | -    | -    |
| MGST3    | rs10737515 | A/G | Promoter | Y | 99  | 97  | 0.21 | 0.22 | 0.64 | 0.61 | 0.35 | 0.63 | 0.34 |

|  |         |            |     |          |   |     |     |      |      |      |      |      |      |      |
|--|---------|------------|-----|----------|---|-----|-----|------|------|------|------|------|------|------|
|  |         | rs4147593  | A/T | Promoter | Y | 97  | 99  | 0.21 | 0.22 | 0.50 | 0.69 | 0.38 | 0.79 | 0.41 |
|  |         | rs4626863  | C/G | Promoter | Y | 100 | 100 | 0.06 | 0.07 | 0.41 | 0.28 | 0.71 | 0.12 | 0.15 |
|  |         | rs6694924  | C/T | Promoter | Y | 98  | 97  | 0.19 | 0.19 | 0.80 | 0.94 | 0.76 | 0.83 | 0.74 |
|  |         | rs4147592  | G/A | Promoter | N | -   | -   | -    | -    | -    | -    | -    | -    | -    |
|  |         | rs12040685 | A/G | Promoter | N | -   | -   | -    | -    | -    | -    | -    | -    | -    |
|  |         | rs9333367  | G/C | Promoter | N | -   | -   | -    | -    | -    | -    | -    | -    | -    |
|  |         | rs8133     | G/T | 3'UTR    | N | -   | -   | -    | -    | -    | -    | -    | -    | -    |
|  | RPL13A  | rs4802612  | A/G | Promoter | Y | 95  | 98  | 0.08 | 0.08 | 0.72 | 1.00 | 0.98 | 0.91 | 1.00 |
|  |         | rs2271952  | A/G | Promoter | N | -   | -   | -    | -    | -    | -    | -    | -    | -    |
|  | UCHL1   | rs11556271 | G/A | 5'UTR    | N | -   | -   | -    | -    | -    | -    | -    | -    | -    |
|  | UCHL3   | rs2274048  | G/T | 3'UTR    | Y | 100 | 100 | 0.07 | 0.06 | 0.33 | 0.06 | 0.97 | 0.33 | 0.56 |
|  |         | rs2281762  | A/G | Promoter | Y | 99  | 96  | 0.37 | 0.36 | 0.25 | 0.52 | 0.94 | 0.27 | 0.54 |
|  |         | rs7326807  | G/A | Promoter | N | -   | -   | -    | -    | -    | -    | -    | -    | -    |
|  |         | rs3812845  | C/G | Promoter | N | -   | -   | -    | -    | -    | -    | -    | -    | -    |
|  | UGT1A10 | rs3892221  | C/T | IVS      | N | -   | -   | -    | -    | -    | -    | -    | -    | -    |
|  |         | rs1105879  | C/A | IVS      | N | -   | -   | -    | -    | -    | -    | -    | -    | -    |
|  |         | rs11692021 | C/T | IVS      | N | -   | -   | -    | -    | -    | -    | -    | -    | -    |
|  |         | rs2070959  | A/G | IVS      | N | -   | -   | -    | -    | -    | -    | -    | -    | -    |
|  |         | rs34150486 | C/G | CDS      | N | -   | -   | -    | -    | -    | -    | -    | -    | -    |
|  |         | rs3755320  | C/A | IVS      | N | -   | -   | -    | -    | -    | -    | -    | -    | -    |
|  |         | rs28946885 | A/T | IVS      | N | -   | -   | -    | -    | -    | -    | -    | -    | -    |
|  | UGT1A4  | rs3806591  | G/A | IVS      | N | -   | -   | -    | -    | -    | -    | -    | -    | -    |
|  | UGT1A8  | rs10210058 | C/T | Promoter | N | -   | -   | -    | -    | -    | -    | -    | -    | -    |
|  | UGT1A9  | rs17864684 | G/A | IVS      | N | -   | -   | -    | -    | -    | -    | -    | -    | -    |
|  |         | rs3806598  | C/A | IVS      | N | -   | -   | -    | -    | -    | -    | -    | -    | -    |
|  | UGT2A1  | rs4148279  | A/G | Promoter | Y | 99  | 99  | 0.43 | 0.42 | 0.59 | 0.20 | 0.32 | 0.27 | 0.94 |
|  |         | rs4148278  | G/A | IVS      | N | -   | -   | -    | -    | -    | -    | -    | -    | -    |
|  | UGT2B4  | rs13129471 | A/G | Promoter | Y | 100 | 99  | 0.25 | 0.24 | 0.60 | 0.36 | 0.80 | 0.19 | 0.73 |
|  |         | rs2736441  | C/G | Promoter | Y | 0   | 0   | -    | -    | -    | -    | -    | -    | -    |
|  |         | rs6820660  | C/T | Promoter | Y | 100 | 100 | 0.24 | 0.22 | 0.61 | 0.30 | 0.12 | 1.00 | 0.54 |
|  |         | rs6821129  | G/T | Promoter | Y | 99  | 99  | 0.23 | 0.23 | 0.64 | 0.36 | 0.22 | 0.63 | 0.91 |
|  |         | rs941389   | A/C | Promoter | Y | 100 | 100 | 0.26 | 0.25 | 0.94 | 0.28 | 0.99 | 0.13 | 0.54 |
|  | UGT2B7  | rs12233719 | G/T | CDS      | Y | 100 | 100 | 0.14 | 0.14 | 0.17 | 0.93 | 0.76 | 0.82 | 0.82 |
|  |         | rs11940316 | C/T | Promoter | Y | 100 | 100 | 0.32 | 0.35 | 0.90 | 0.30 | 0.16 | 0.32 | 0.13 |
|  | UGT2B11 | rs6833028  | C/T | Promoter | Y | 100 | 100 | 0.00 | 0.00 | -    | -    | -    | -    | -    |
|  |         | rs7668282  | C/T | Promoter | Y | 100 | 100 | 0.10 | 0.10 | 0.26 | 0.89 | 0.69 | 0.67 | 0.63 |
|  | AR      | rs9332969  | A/G | CDS      | N | -   | -   | -    | -    | -    | -    | -    | -    | -    |
|  | BMPRI1B | rs4348103  | A/C | Promoter | Y | 99  | 100 | 0.32 | 0.33 | 0.31 | 0.48 | 0.20 | 0.91 | 0.36 |
|  |         | rs1434548  | C/G | IVS      | Y | 100 | 100 | 0.08 | 0.10 | 0.09 | 0.32 | 0.71 | 0.11 | 0.14 |
|  |         | rs17023017 | G/T | IVS      | Y | 100 | 100 | 0.28 | 0.28 | 0.71 | 0.57 | 0.61 | 0.62 | 0.87 |
|  | C3      | rs1047286  | G/A | CDS      | N | -   | -   | -    | -    | -    | -    | -    | -    | -    |
|  |         | rs11569393 | G/T | Promoter | Y | 96  | 95  | 0.20 | 0.18 | 0.20 | -    | -    | -    | -    |

Estrogen Receptor Signaling  
(n=77)









|          |            |     |          |   |     |     |      |      |      |       |      |       |       |   |
|----------|------------|-----|----------|---|-----|-----|------|------|------|-------|------|-------|-------|---|
|          | rs16949649 | C/T | Promoter | N | -   | -   | -    | -    | -    | -     | -    | -     | -     | - |
|          | rs11556835 | A/G | 5'UTR    | N | -   | -   | -    | -    | -    | -     | -    | -     | -     | - |
| NRIP1    | rs2228507  | A/T | CDS      | Y | 99  | 99  | 0.23 | 0.22 | 0.23 | 0.86  | 0.71 | 0.80  | 0.82  |   |
| NSD1     | rs3733875  | G/T | CDS      | N | -   | -   | -    | -    | -    | -     | -    | -     | -     | - |
|          | rs28932178 | C/T | CDS      | N | -   | -   | -    | -    | -    | -     | -    | -     | -     | - |
| PAPPA    | rs417012   | G/T | CDS      | N | -   | -   | -    | -    | -    | -     | -    | -     | -     | - |
|          | rs7020782  | A/C | CDS      | Y | 100 | 100 | 0.20 | 0.20 | 0.11 | 0.29  | 0.56 | 0.24  | 0.95  |   |
|          | rs386088   | A/G | 5'UTR    | N | -   | -   | -    | -    | -    | -     | -    | -     | -     | - |
| PGR      | rs484389   | C/T | 3'UTR    | Y | 100 | 100 | 0.20 | 0.19 | 0.13 | 0.35  | 0.27 | 0.56  | 0.39  |   |
| PHB2     | rs11541468 | A/G | 5'UTR    | Y | 98  | 97  | 0.12 | 0.11 | 0.10 | 0.15  | 0.07 | 0.72  | 0.44  |   |
| PPARGC1B | rs11959820 | A/C | CDS      | Y | 100 | 100 | 0.12 | 0.11 | 0.02 | -     | -    | -     | -     | - |
|          | rs7732671  | C/G | CDS      | Y | 100 | 100 | 0.06 | 0.04 | 0.28 | -     | -    | -     | -     | - |
| PPP1R15A | rs35087747 | G/T | CDS      | N | -   | -   | -    | -    | -    | -     | -    | -     | -     | - |
|          | rs611251   | A/G | CDS      | Y | 100 | 100 | 0.08 | 0.08 | 0.90 | 0.91  | 0.81 | 0.87  | 0.84  |   |
|          | rs3786734  | G/A | CDS      | N | -   | -   | -    | -    | -    | -     | -    | -     | -     | - |
|          | rs564196   | G/A | CDS      | N | -   | -   | -    | -    | -    | -     | -    | -     | -     | - |
|          | rs626974   | G/A | 5'UTR    | N | -   | -   | -    | -    | -    | -     | -    | -     | -     | - |
|          | rs500079   | G/A | CDS      | N | -   | -   | -    | -    | -    | -     | -    | -     | -     | - |
| RAC2     | rs2413458  | A/G | Promoter | Y | 0   | 0   | -    | -    | -    | -     | -    | -     | -     | - |
| RERG     | rs961176   | A/C | Promoter | Y | 100 | 100 | 0.14 | 0.14 | 0.44 | 0.67  | 0.98 | 0.47  | 0.83  |   |
|          | rs767201   | A/G | IVS      | Y | 100 | 100 | 0.25 | 0.24 | 0.31 | 0.68  | 0.43 | 0.97  | 0.72  |   |
| RPL27    | rs323505   | C/T | Promoter | Y | 99  | 99  | 0.01 | 0.01 | 0.77 | -     | -    | -     | -     | - |
| S100A2   | rs8401     | G/A | 3'UTR    | N | -   | -   | -    | -    | -    | -     | -    | -     | -     | - |
| SCGB1D2  | rs12226294 | A/C | Promoter | N | -   | -   | -    | -    | -    | -     | -    | -     | -     | - |
|          | rs2232946  | C/T | Promoter | Y | 100 | 100 | 0.49 | 0.42 | 0.06 | 0.001 | 0.02 | 0.002 | 0.001 |   |
|          | rs2232950  | C/T | CDS      | Y | 100 | 100 | 0.18 | 0.22 | 0.85 | 0.06  | 0.27 | 0.01  | 0.01  |   |
|          | rs2232954  | G/A | 3'UTR    | N | -   | -   | -    | -    | -    | -     | -    | -     | -     | - |
| SCGB2A1  | rs3900954  | A/G | Promoter | Y | 99  | 99  | 0.15 | 0.17 | 0.87 | 0.46  | 0.70 | 0.22  | 0.23  |   |
| SCGB2A2  | rs7125138  | C/T | Promoter | Y | 84  | 90  | 0.20 | 0.21 | 0.00 | -     | -    | -     | -     | - |
| SERPINA3 | rs1884082  | G/T | Promoter | Y | 100 | 100 | 0.36 | 0.35 | 0.26 | 0.85  | 0.72 | 0.62  | 0.59  |   |
| SERPINB5 | rs10048322 | A/G | Promoter | N | -   | -   | -    | -    | -    | -     | -    | -     | -     | - |
|          | rs17071138 | C/T | Promoter | N | -   | -   | -    | -    | -    | -     | -    | -     | -     | - |
|          | rs1455555  | G/A | CDS      | N | -   | -   | -    | -    | -    | -     | -    | -     | -     | - |
|          | rs2289520  | C/G | CDS      | N | -   | -   | -    | -    | -    | -     | -    | -     | -     | - |
|          | rs3744940  | C/T | Promoter | N | -   | -   | -    | -    | -    | -     | -    | -     | -     | - |
|          | rs3744941  | C/T | Promoter | N | -   | -   | -    | -    | -    | -     | -    | -     | -     | - |
|          | rs2289519  | C/T | CDS      | N | -   | -   | -    | -    | -    | -     | -    | -     | -     | - |
|          | rs7244879  | G/A | IVS      | N | -   | -   | -    | -    | -    | -     | -    | -     | -     | - |
| SERPINE1 | rs2227631  | A/G | Promoter | N | -   | -   | -    | -    | -    | -     | -    | -     | -     | - |
|          | rs6092     | A/G | CDS      | N | -   | -   | -    | -    | -    | -     | -    | -     | -     | - |
| SPRR1B   | rs1933381  | C/G | Promoter | Y | 97  | 98  | 0.31 | 0.31 | 0.51 | 0.80  | 0.66 | 0.79  | 0.99  |   |
|          | rs2711     | C/T | 3'UTR    | Y | 100 | 100 | 0.35 | 0.35 | 0.31 | 0.85  | 0.85 | 0.74  | 0.88  |   |

|  |         |            |     |          |   |     |     |      |      |      |      |      |      |      |
|--|---------|------------|-----|----------|---|-----|-----|------|------|------|------|------|------|------|
|  |         | rs3806221  | G/T | Promoter | N | -   | -   | -    | -    | -    | -    | -    | -    | -    |
|  |         | rs3806223  | C/T | Promoter | N | -   | -   | -    | -    | -    | -    | -    | -    | -    |
|  |         | rs10788855 | A/T | Promoter | N | -   | -   | -    | -    | -    | -    | -    | -    | -    |
|  |         | rs3181787  | C/T | 5'UTR    | N | -   | -   | -    | -    | -    | -    | -    | -    | -    |
|  |         | rs10788854 | C/T | Promoter | N | -   | -   | -    | -    | -    | -    | -    | -    | -    |
|  |         | rs11205176 | G/A | Promoter | N | -   | -   | -    | -    | -    | -    | -    | -    | -    |
|  |         | rs12085426 | A/C | Promoter | N | -   | -   | -    | -    | -    | -    | -    | -    | -    |
|  |         | rs3795382  | C/T | CDS      | N | -   | -   | -    | -    | -    | -    | -    | -    | -    |
|  |         | rs11205177 | G/A | Promoter | N | -   | -   | -    | -    | -    | -    | -    | -    | -    |
|  | STC2    | None       | -   | -        | - | -   | -   | -    | -    | -    | -    | -    | -    | -    |
|  | SULT1E1 | rs3736599  | A/G | 5'UTR    | Y | 100 | 100 | 0.25 | 0.28 | 0.14 | 0.36 | 0.19 | 0.27 | 0.16 |
|  | TFF1    | rs225359   | A/G | Promoter | Y | 100 | 100 | 0.22 | 0.23 | 0.86 | 0.62 | 0.45 | 0.48 | 0.38 |
|  | THBS4   | rs1866389  | C/G | CDS      | Y | 98  | 98  | 0.07 | 0.07 | 0.99 | 0.93 | 0.87 | 0.80 | 0.92 |
|  |         | rs3813667  | C/T | Promoter | Y | 91  | 87  | 0.24 | 0.22 | 0.13 | -    | -    | -    | -    |
|  |         | rs405482   | G/A | IVS      | N | -   | -   | -    | -    | -    | -    | -    | -    | -    |
|  |         | rs447875   | G/A | IVS      | N | -   | -   | -    | -    | -    | -    | -    | -    | -    |
|  | TOP2A   | rs525812   | G/C | Promoter | N | -   | -   | -    | -    | -    | -    | -    | -    | -    |
|  | VIM     | rs3758411  | C/G | Promoter | Y | 81  | 85  | 0.28 | 0.27 | 0.00 | -    | -    | -    | -    |
|  | ATXN3   | rs17127937 | A/G | 3'UTR    | Y | 100 | 100 | 0.44 | 0.45 | 0.10 | 0.60 | 0.38 | 0.85 | 0.64 |
|  |         | rs2896196  | C/G | Promoter | Y | 99  | 100 | 0.13 | 0.12 | 0.80 | 0.91 | 0.76 | 0.68 | 0.65 |
|  |         | rs1048755  | G/A | IVS      | N | -   | -   | -    | -    | -    | -    | -    | -    | -    |
|  | BRIP1   | rs2048718  | C/T | Promoter | Y | 97  | 97  | 0.20 | 0.18 | 0.55 | 0.38 | 0.42 | 0.20 | 0.17 |
|  |         | rs4986764  | C/T | CDS      | Y | 99  | 100 | 0.26 | 0.24 | 0.90 | 0.67 | 0.41 | 0.67 | 0.40 |
|  | CETN2   | rs3761503  | C/T | Promoter | Y | 97  | 100 | 0.17 | 0.15 | 0.00 | -    | -    | -    | -    |
|  |         | rs3213467  | C/T | Promoter | Y | 99  | 100 | 0.11 | 0.10 | 0.00 | -    | -    | -    | -    |
|  | DKC1    | None       | -   | -        | - | -   | -   | -    | -    | -    | -    | -    | -    | -    |
|  | ERCC6   | rs4253211  | C/G | CDS      | Y | 100 | 100 | 0.06 | 0.05 | 0.23 | 0.37 | 0.60 | 0.20 | 0.27 |
|  |         | rs4253231  | C/T | 3'UTR    | Y | 83  | 92  | 0.21 | 0.23 | 0.26 | -    | -    | -    | -    |
|  |         | rs2228527  | T/C | CDS      | N | -   | -   | -    | -    | -    | -    | -    | -    | -    |
|  |         | rs2228528  | T/C | CDS      | N | -   | -   | -    | -    | -    | -    | -    | -    | -    |
|  |         | rs2228529  | T/C | CDS      | N | -   | -   | -    | -    | -    | -    | -    | -    | -    |
|  |         | rs4253004  | C/A | 5'UTR    | N | -   | -   | -    | -    | -    | -    | -    | -    | -    |
|  |         | rs2228526  | T/C | CDS      | N | -   | -   | -    | -    | -    | -    | -    | -    | -    |
|  | GTF2H4  | rs1052693  | C/T | 5'UTR    | Y | 98  | 98  | 0.45 | 0.46 | 0.11 | 0.89 | 0.57 | 0.99 | 0.75 |
|  |         | rs2284175  | C/T | Promoter | Y | 98  | 98  | 0.45 | 0.45 | 0.35 | 0.87 | 0.62 | 0.72 | 0.90 |
|  |         | rs1264309  | G/A | Promoter | N | -   | -   | -    | -    | -    | -    | -    | -    | -    |
|  |         | rs2074510  | T/G | 5'UTR    | N | -   | -   | -    | -    | -    | -    | -    | -    | -    |
|  |         | rs3218802  | A/G | Promoter | N | -   | -   | -    | -    | -    | -    | -    | -    | -    |
|  |         | rs3218808  | C/T | 5'UTR    | N | -   | -   | -    | -    | -    | -    | -    | -    | -    |
|  | MGMT    | rs12917    | C/T | CDS      | Y | 88  | 93  | 0.13 | 0.14 | 0.96 | -    | -    | -    | -    |
|  | MMS19L  | rs2275586  | C/G | CDS      | Y | 99  | 99  | 0.02 | 0.02 | 0.62 | -    | -    | -    | -    |
|  |         | rs3750558  | C/A | 5'UTR    | N | -   | -   | -    | -    | -    | -    | -    | -    | -    |

Genome Stability  
(n=34)

|        |            |     |          |   |     |     |      |      |      |      |      |      |      |
|--------|------------|-----|----------|---|-----|-----|------|------|------|------|------|------|------|
|        | rs17112841 | A/G | Promoter | N | -   | -   | -    | -    | -    | -    | -    | -    | -    |
| NEIL2  | rs3802168  | C/T | 5'UTR    | Y | 89  | 91  | 0.25 | 0.23 | 0.01 | -    | -    | -    | -    |
|        | rs8191518  | C/G | 5'UTR    | N | -   | -   | -    | -    | -    | -    | -    | -    | -    |
|        | rs8191664  | G/T | CDS      | N | -   | -   | -    | -    | -    | -    | -    | -    | -    |
|        | rs8191514  | C/G | Promoter | N | -   | -   | -    | -    | -    | -    | -    | -    | -    |
|        | rs8191613  | A/G | CDS      | N | -   | -   | -    | -    | -    | -    | -    | -    | -    |
|        | rs1534862  | C/T | 3'UTR    | N | -   | -   | -    | -    | -    | -    | -    | -    | -    |
|        | rs804270   | C/G | IVS      | N | -   | -   | -    | -    | -    | -    | -    | -    | -    |
| NEIL3  | rs10009807 | A/G | Promoter | Y | 98  | 97  | 0.07 | 0.05 | 0.74 | -    | -    | -    | -    |
|        | rs17064587 | A/G | 5'UTR    | Y | 100 | 99  | 0.28 | 0.26 | 0.99 | 0.53 | 0.45 | 0.33 | 0.28 |
|        | rs17064676 | A/G | CDS      | Y | 99  | 99  | 0.05 | 0.04 | 0.25 | -    | -    | -    | -    |
|        | rs17726200 | G/T | Promoter | Y | 100 | 100 | 0.21 | 0.24 | 0.18 | 0.07 | 0.02 | 0.49 | 0.15 |
|        | rs34193982 | A/G | CDS      | Y | 98  | 98  | 0.12 | 0.11 | 0.11 | 0.32 | 0.80 | 0.19 | 0.60 |
|        | rs34715119 | A/T | Promoter | N | -   | -   | -    | -    | -    | -    | -    | -    | -    |
|        | rs7689099  | C/G | CDS      | N | -   | -   | -    | -    | -    | -    | -    | -    | -    |
|        | rs13112358 | C/T | CDS      | N | -   | -   | -    | -    | -    | -    | -    | -    | -    |
|        | rs13112390 | A/C | CDS      | N | -   | -   | -    | -    | -    | -    | -    | -    | -    |
|        | rs34007209 | C/T | CDS      | N | -   | -   | -    | -    | -    | -    | -    | -    | -    |
|        | rs34403901 | G/T | Promoter | N | -   | -   | -    | -    | -    | -    | -    | -    | -    |
| PARP1  | rs907187   | C/G | IVS      | Y | 94  | 82  | 0.47 | 0.48 | 0.03 | -    | -    | -    | -    |
|        | rs1136410  | G/A | CDS      | N | -   | -   | -    | -    | -    | -    | -    | -    | -    |
|        | rs1341336  | A/G | Promoter | N | -   | -   | -    | -    | -    | -    | -    | -    | -    |
|        | rs3219145  | T/C | CDS      | N | -   | -   | -    | -    | -    | -    | -    | -    | -    |
|        | rs7531668  | A/T | Promoter | N | -   | -   | -    | -    | -    | -    | -    | -    | -    |
| PARP3  | rs929533   | G/A | Promoter | N | -   | -   | -    | -    | -    | -    | -    | -    | -    |
| PINX1  | rs3808605  | C/T | Promoter | Y | 99  | 99  | 0.12 | 0.11 | 0.71 | 0.66 | 0.69 | 0.52 | 0.60 |
|        | rs1078543  | A/T | CDS      | N | -   | -   | -    | -    | -    | -    | -    | -    | -    |
| POLL   | rs3730478  | G/A | 3'UTR    | N | -   | -   | -    | -    | -    | -    | -    | -    | -    |
| POT1   | rs7782410  | A/G | Promoter | N | -   | -   | -    | -    | -    | -    | -    | -    | -    |
|        | rs3815221  | G/A | IVS      | N | -   | -   | -    | -    | -    | -    | -    | -    | -    |
| RAD54B | rs2028429  | A/T | Promoter | Y | 100 | 100 | 0.05 | 0.06 | 0.09 | -    | -    | -    | -    |
|        | rs3099398  | A/G | IVS      | Y | 0   | 0   | -    | -    | -    | -    | -    | -    | -    |
| RFC1   | None       | -   | -        | - | -   | -   | -    | -    | -    | -    | -    | -    | -    |
| SLK    | rs3740469  | A/G | CDS      | Y | 100 | 100 | 0.15 | 0.14 | 0.60 | 0.89 | 0.80 | 0.73 | 0.70 |
|        | rs6584583  | C/T | Promoter | Y | 98  | 95  | 0.08 | 0.09 | 0.21 | 0.84 | 0.56 | 0.99 | 0.57 |
| SMG6   | rs408067   | G/C | Promoter | N | -   | -   | -    | -    | -    | -    | -    | -    | -    |
|        | rs1885986  | G/C | CDS      | N | -   | -   | -    | -    | -    | -    | -    | -    | -    |
| SMUG1  | rs4759344  | A/G | Promoter | Y | 0   | 0   | -    | -    | -    | -    | -    | -    | -    |
|        | rs6580978  | A/G | Promoter | Y | 99  | 99  | 0.43 | 0.44 | 0.35 | 0.21 | 0.70 | 0.13 | 0.56 |
|        | rs2233921  | C/A | 3'UTR    | N | -   | -   | -    | -    | -    | -    | -    | -    | -    |
| TDG    | rs3829300  | A/G | IVS      | Y | 100 | 100 | 0.28 | 0.29 | 0.24 | 0.60 | 0.33 | 0.96 | 0.43 |
|        | rs4135036  | C/T | Promoter | Y | 100 | 100 | 0.22 | 0.21 | 0.58 | 0.90 | 0.66 | 0.67 | 0.60 |

|  |         |            |     |          |   |     |     |      |      |      |      |      |      |      |
|--|---------|------------|-----|----------|---|-----|-----|------|------|------|------|------|------|------|
|  |         | rs4135038  | G/A | 5'UTR    | N | -   | -   | -    | -    | -    | -    | -    | -    | -    |
|  |         | rs4135113  | A/G | CDS      | Y | 100 | 100 | 0.21 | 0.19 | 0.00 | -    | -    | -    | -    |
|  | TEP1    | rs1713456  | C/T | CDS      | Y | 100 | 100 | 0.10 | 0.09 | 0.69 | 0.76 | 0.70 | 0.83 | 0.69 |
|  |         | rs1760890  | C/A | Promoter | N | -   | -   | -    | -    | -    | -    | -    | -    | -    |
|  |         | rs1760897  | C/T | CDS      | Y | 100 | 100 | 0.16 | 0.16 | 0.09 | 0.16 | 0.12 | 0.43 | 0.81 |
|  |         | rs1760904  | C/T | CDS      | Y | 99  | 96  | 0.38 | 0.39 | 0.80 | 0.70 | 0.94 | 0.49 | 0.68 |
|  |         | rs2228035  | A/G | CDS      | Y | 92  | 91  | 0.05 | 0.04 | 0.29 | -    | -    | -    | -    |
|  |         | rs2228041  | T/C | CDS      | N | -   | -   | -    | -    | -    | -    | -    | -    | -    |
|  |         | rs4246977  | C/T | Promoter | N | -   | -   | -    | -    | -    | -    | -    | -    | -    |
|  |         | rs4982051  | A/G | CDS      | N | -   | -   | -    | -    | -    | -    | -    | -    | -    |
|  |         | rs938886   | C/G | CDS      | N | -   | -   | -    | -    | -    | -    | -    | -    | -    |
|  |         | rs1760898  | T/G | CDS      | N | -   | -   | -    | -    | -    | -    | -    | -    | -    |
|  |         | rs34179031 | T/C | CDS      | N | -   | -   | -    | -    | -    | -    | -    | -    | -    |
|  |         | rs1760894  | A/G | IVS      | N | -   | -   | -    | -    | -    | -    | -    | -    | -    |
|  |         | rs1760895  | A/G | IVS      | N | -   | -   | -    | -    | -    | -    | -    | -    | -    |
|  | TERF2IP | rs1865493  | C/G | Promoter | N | -   | -   | -    | -    | -    | -    | -    | -    | -    |
|  | TERT    | rs34062885 | T/G | CDS      | N | -   | -   | -    | -    | -    | -    | -    | -    | -    |
|  |         | rs2853669  | G/A | Promoter | N | -   | -   | -    | -    | -    | -    | -    | -    | -    |
|  | TINF2   | rs28372734 | G/C | 5'UTR    | N | -   | -   | -    | -    | -    | -    | -    | -    | -    |
|  | TNKS    | rs9329203  | G/A | Promoter | N | -   | -   | -    | -    | -    | -    | -    | -    | -    |
|  |         | rs9329202  | G/A | Promoter | N | -   | -   | -    | -    | -    | -    | -    | -    | -    |
|  |         | rs10109026 | C/T | Promoter | N | -   | -   | -    | -    | -    | -    | -    | -    | -    |
|  | TNKS2   | rs12411706 | A/G | IVS      | Y | 85  | 82  | 0.00 | 0.00 | -    | -    | -    | -    | -    |
|  | TOP3B   | rs762474   | G/T | 5'UTR    | Y | 100 | 100 | 0.08 | 0.08 | 0.14 | 0.80 | 0.89 | 0.45 | 0.51 |
|  |         | rs9610728  | C/T | CDS      | Y | 97  | 98  | 0.09 | 0.08 | 0.36 | 0.99 | 0.78 | 0.92 | 0.82 |
|  | TPP1    | rs1800752  | G/A | Promoter | N | -   | -   | -    | -    | -    | -    | -    | -    | -    |
|  |         | rs1800753  | A/G | IVS      | N | -   | -   | -    | -    | -    | -    | -    | -    | -    |
|  | UBE2A   | rs5910619  | C/T | Promoter | Y | 100 | 100 | 0.23 | 0.18 | 0.00 | -    | -    | -    | -    |
|  | UBE2B   | rs1379247  | A/G | Promoter | Y | 99  | 100 | 0.04 | 0.03 | 0.04 | -    | -    | -    | -    |
|  | UBE2I   | rs4610     | A/G | IVS      | Y | 99  | 100 | 0.04 | 0.04 | 0.00 | -    | -    | -    | -    |
|  |         | rs8063     | A/G | 3'UTR    | Y | 100 | 100 | 0.05 | 0.04 | 0.00 | -    | -    | -    | -    |
|  | UBE2N   | rs3759169  | C/T | Promoter | Y | 100 | 100 | 0.24 | 0.26 | 0.60 | 0.73 | 0.46 | 0.54 | 0.43 |
|  | XAB2    | rs3760676  | A/G | Promoter | Y | 97  | 98  | 0.20 | 0.18 | 0.76 | 0.48 | 0.36 | 0.42 | 0.29 |
|  |         | rs4134809  | C/A | Promoter | N | -   | -   | -    | -    | -    | -    | -    | -    | -    |
|  | ALOX12  | rs9897850  | C/T | Promoter | N | -   | -   | -    | -    | -    | -    | -    | -    | -    |
|  |         | rs312466   | G/A | Promoter | N | -   | -   | -    | -    | -    | -    | -    | -    | -    |
|  |         | rs11571326 | G/A | Promoter | N | -   | -   | -    | -    | -    | -    | -    | -    | -    |
|  |         | rs9904779  | C/G | Promoter | N | -   | -   | -    | -    | -    | -    | -    | -    | -    |
|  |         | rs1126667  | A/G | CDS      | N | -   | -   | -    | -    | -    | -    | -    | -    | -    |
|  | AMH     | rs10407022 | G/T | CDS      | N | -   | -   | -    | -    | -    | -    | -    | -    | -    |
|  |         | rs4807216  | C/T | Promoter | N | -   | -   | -    | -    | -    | -    | -    | -    | -    |
|  | APBB1   | rs2723664  | A/G | Promoter | Y | 97  | 96  | 0.33 | 0.32 | 0.38 | 0.54 | 0.22 | 0.72 | 0.40 |

Growth Factors  
(n=69)





|         |            |     |          |   |     |     |      |      |      |      |      |      |      |
|---------|------------|-----|----------|---|-----|-----|------|------|------|------|------|------|------|
| INHBA   | rs2877098  | C/T | Promoter | Y | 100 | 100 | 0.35 | 0.35 | 0.29 | 0.94 | 0.71 | 0.89 | 0.84 |
| INHBB   | rs7578624  | C/G | Promoter | N | -   | -   | -    | -    | -    | -    | -    | -    | -    |
| JAG2    | rs1057744  | T/C | CDS      | N | -   | -   | -    | -    | -    | -    | -    | -    | -    |
|         | rs2238286  | A/G | Promoter | N | -   | -   | -    | -    | -    | -    | -    | -    | -    |
|         | rs9972231  | C/T | CDS      | N | -   | -   | -    | -    | -    | -    | -    | -    | -    |
| LEFTY1  | rs1877726  | G/A | Promoter | N | -   | -   | -    | -    | -    | -    | -    | -    | -    |
|         | rs3766941  | A/C | 3'UTR    | Y | 99  | 100 | 0.25 | 0.23 | 0.91 | 0.43 | 0.26 | 0.48 | 0.31 |
|         | rs360057   | G/T | CDS      | N | -   | -   | -    | -    | -    | -    | -    | -    | -    |
| LEFTY2  | rs3753673  | A/G | Promoter | Y | 99  | 98  | 0.08 | 0.08 | 0.51 | 0.58 | 0.26 | 0.61 | 0.50 |
|         | rs3753674  | A/G | Promoter | N | -   | -   | -    | -    | -    | -    | -    | -    | -    |
|         | rs2295418  | A/G | CDS      | N | -   | -   | -    | -    | -    | -    | -    | -    | -    |
|         | rs366439   | A/G | CDS      | N | -   | -   | -    | -    | -    | -    | -    | -    | -    |
| LIF     | rs2267153  | C/G | Promoter | Y | 100 | 100 | 0.32 | 0.33 | 0.75 | 0.66 | 0.44 | 0.67 | 0.44 |
| LTBP4   | rs10880    | C/T | IVS      | Y | 99  | 100 | 0.30 | 0.30 | 0.50 | 0.26 | 0.25 | 0.47 | 0.56 |
|         | rs1131620  | A/G | CDS      | N | -   | -   | -    | -    | -    | -    | -    | -    | -    |
|         | rs1051481  | G/A | 3'UTR    | N | -   | -   | -    | -    | -    | -    | -    | -    | -    |
|         | rs2303729  | G/A | CDS      | N | -   | -   | -    | -    | -    | -    | -    | -    | -    |
|         | rs33937741 | C/G | CDS      | N | -   | -   | -    | -    | -    | -    | -    | -    | -    |
|         | rs11668767 | C/T | CDS      | N | -   | -   | -    | -    | -    | -    | -    | -    | -    |
| NDP     | rs5905587  | C/T | Promoter | Y | 97  | 98  | 0.34 | 0.32 | 0.00 | -    | -    | -    | -    |
|         | rs5906332  | A/G | Promoter | Y | 91  | 96  | 0.25 | 0.21 | 0.00 | -    | -    | -    | -    |
|         | rs5953000  | A/G | Promoter | Y | 99  | 100 | 0.33 | 0.32 | 0.00 | -    | -    | -    | -    |
| NDUFA13 | rs7250893  | G/A | Promoter | N | -   | -   | -    | -    | -    | -    | -    | -    | -    |
| NODAL   | rs1904589  | C/T | CDS      | Y | 92  | 88  | 0.14 | 0.13 | 0.03 | -    | -    | -    | -    |
| NRG1    | rs3802158  | A/G | Promoter | Y | 100 | 99  | 0.21 | 0.23 | 0.37 | 0.24 | 0.07 | 0.51 | 0.24 |
|         | rs3802159  | C/G | Promoter | Y | 100 | 100 | 0.35 | 0.34 | 0.41 | 0.47 | 0.54 | 0.49 | 0.83 |
|         | rs3802160  | C/T | Promoter | Y | 99  | 100 | 0.21 | 0.23 | 0.36 | 0.26 | 0.08 | 0.46 | 0.22 |
|         | rs3924999  | C/T | CDS      | Y | 100 | 100 | 0.25 | 0.20 | 0.14 | 0.00 | 0.00 | 0.04 | 0.00 |
|         | rs7820838  | C/T | IVS      | N | -   | -   | -    | -    | -    | -    | -    | -    | -    |
|         | rs7834206  | C/A | 5'UTR    | N | -   | -   | -    | -    | -    | -    | -    | -    | -    |
| NRG3    | rs2295934  | G/T | CDS      | Y | 100 | 100 | 0.06 | 0.06 | 0.45 | 0.79 | 0.58 | 0.64 | 0.59 |
| NRTN    | rs3763046  | A/G | 5'UTR    | N | -   | -   | -    | -    | -    | -    | -    | -    | -    |
| NTF3    | rs6489629  | A/G | Promoter | Y | 100 | 100 | 0.24 | 0.25 | 0.09 | 0.34 | 0.40 | 0.47 | 0.68 |
|         | rs1805149  | A/G | CDS      | N | -   | -   | -    | -    | -    | -    | -    | -    | -    |
| OSGIN1  | rs4782863  | A/G | Promoter | Y | 99  | 98  | 0.14 | 0.15 | 0.70 | 0.60 | 0.92 | 0.33 | 0.38 |
|         | rs4782865  | C/T | CDS      | Y | 99  | 98  | 0.22 | 0.22 | 0.18 | 0.65 | 0.50 | 0.61 | 0.85 |
| PCLKC   | rs17078347 | A/C | CDS      | Y | 87  | 87  | 0.46 | 0.45 | 0.45 | -    | -    | -    | -    |
|         | rs2291442  | T/C | CDS      | N | -   | -   | -    | -    | -    | -    | -    | -    | -    |
| PDGFC   | rs3733486  | C/T | 5'UTR    | Y | 0   | 0   | -    | -    | -    | -    | -    | -    | -    |
| PML     | rs743580   | A/G | 3'UTR    | N | -   | -   | -    | -    | -    | -    | -    | -    | -    |
|         | rs743581   | G/T | 3'UTR    | N | -   | -   | -    | -    | -    | -    | -    | -    | -    |
|         | rs743582   | C/G | CDS      | Y | 94  | 91  | 0.19 | 0.16 | 0.14 | -    | -    | -    | -    |

GST MMP CYP NAT  
(n=38)

|         |            |     |          |   |     |     |      |      |      |      |      |      |      |   |
|---------|------------|-----|----------|---|-----|-----|------|------|------|------|------|------|------|---|
| PPP2CA  | rs2292283  | G/A | Promoter | N | -   | -   | -    | -    | -    | -    | -    | -    | -    | - |
| PSPN    | None       | -   | -        | - | -   | -   | -    | -    | -    | -    | -    | -    | -    | - |
| SIPA1   | rs34912782 | C/G | CDS      | N | -   | -   | -    | -    | -    | -    | -    | -    | -    | - |
|         | rs3741378  | T/C | CDS      | N | -   | -   | -    | -    | -    | -    | -    | -    | -    | - |
| SLCO1A2 | rs10770797 | C/T | IVS      | Y | 99  | 100 | 0.29 | 0.29 | 0.25 | 0.95 | 0.92 | 0.95 | 1.00 |   |
|         | rs10841803 | A/G | 5'UTR    | N | -   | -   | -    | -    | -    | -    | -    | -    | -    | - |
|         | rs3764045  | C/A | IVS      | N | -   | -   | -    | -    | -    | -    | -    | -    | -    | - |
| SPP1    | rs2853744  | G/T | Promoter | Y | 100 | 100 | 0.31 | 0.28 | 0.89 | 0.35 | 0.18 | 0.63 | 0.21 |   |
|         | rs11730582 | C/T | Promoter | N | -   | -   | -    | -    | -    | -    | -    | -    | -    | - |
| TDGF1   | rs3806703  | C/T | Promoter | Y | 97  | 95  | 0.15 | 0.13 | 0.00 | -    | -    | -    | -    | - |
|         | rs3806704  | G/C | IVS      | N | -   | -   | -    | -    | -    | -    | -    | -    | -    | - |
|         | rs11130097 | C/T | CDS      | N | -   | -   | -    | -    | -    | -    | -    | -    | -    | - |
|         | rs2293025  | T/G | CDS      | N | -   | -   | -    | -    | -    | -    | -    | -    | -    | - |
|         | rs3914851  | G/A | IVS      | N | -   | -   | -    | -    | -    | -    | -    | -    | -    | - |
| THPO    | rs885838   | C/T | Promoter | Y | 92  | 93  | 0.39 | 0.41 | 0.00 | -    | -    | -    | -    | - |
|         | rs956732   | G/A | 5'UTR    | N | -   | -   | -    | -    | -    | -    | -    | -    | -    | - |
|         | rs6141     | A/G | 3'UTR    | N | -   | -   | -    | -    | -    | -    | -    | -    | -    | - |
| WFDC1   | rs12933084 | A/G | CDS      | Y | 100 | 99  | 0.21 | 0.21 | 0.08 | 0.45 | 0.78 | 0.31 | 0.88 |   |
|         | rs400345   | G/A | 5'UTR    | N | -   | -   | -    | -    | -    | -    | -    | -    | -    | - |
| WHDC1   | rs8025432  | A/C | IVS      | N | -   | -   | -    | -    | -    | -    | -    | -    | -    | - |
|         | rs7179000  | G/A | IVS      | N | -   | -   | -    | -    | -    | -    | -    | -    | -    | - |
| ACYP1   | rs7303     | C/T | 3'UTR    | Y | 100 | 100 | 0.18 | 0.20 | 0.69 | 0.43 | 0.31 | 0.33 | 0.23 |   |
| ACYP2   | rs843707   | C/T | 3'UTR    | Y | 95  | 98  | 0.29 | 0.29 | 0.00 | -    | -    | -    | -    | - |
|         | rs843706   | C/A | IVS      | N | -   | -   | -    | -    | -    | -    | -    | -    | -    | - |
| BTNL8   | rs2276995  | A/G | CDS      | Y | 100 | 100 | 0.40 | 0.37 | 0.44 | 0.39 | 0.23 | 0.26 | 0.15 |   |
| C3orf31 | rs7641243  | C/T | CDS      | Y | 100 | 100 | 0.25 | 0.25 | 0.42 | 0.40 | 0.27 | 0.50 | 0.91 |   |
|         | rs9267     | G/A | 3'UTR    | N | -   | -   | -    | -    | -    | -    | -    | -    | -    | - |
| C3orf39 | rs17470089 | C/G | IVS      | Y | 93  | 93  | 0.30 | 0.30 | 0.21 | -    | -    | -    | -    | - |
|         | rs11707725 | C/G | IVS      | Y | 98  | 99  | 0.11 | 0.10 | 0.09 | 0.13 | 0.07 | 0.28 | 0.15 |   |
| CYP20A1 | rs2043449  | A/G | CDS      | Y | 100 | 100 | 0.05 | 0.05 | 0.87 | -    | -    | -    | -    | - |
| CYP2A6  | rs5031017  | C/A | CDS      | N | -   | -   | -    | -    | -    | -    | -    | -    | -    | - |
| CYP2A7  | rs2261144  | A/G | CDS      | N | -   | -   | -    | -    | -    | -    | -    | -    | -    | - |
|         | rs4803393  | C/T | 5'UTR    | N | -   | -   | -    | -    | -    | -    | -    | -    | -    | - |
|         | rs10425176 | A/T | CDS      | N | -   | -   | -    | -    | -    | -    | -    | -    | -    | - |
| CYP39A1 | rs12192544 | C/G | CDS      | Y | 100 | 100 | 0.11 | 0.11 | 0.90 | 0.93 | 0.92 | 0.81 | 0.88 |   |
|         | rs2277119  | A/G | CDS      | Y | 84  | 82  | 0.20 | 0.24 | 0.04 | -    | -    | -    | -    | - |
|         | rs7761731  | A/T | CDS      | N | -   | -   | -    | -    | -    | -    | -    | -    | -    | - |
| CYP4V2  | rs13146272 | A/C | CDS      | N | -   | -   | -    | -    | -    | -    | -    | -    | -    | - |
|         | rs1055138  | G/C | CDS      | N | -   | -   | -    | -    | -    | -    | -    | -    | -    | - |
|         | rs1398007  | G/A | 5'UTR    | N | -   | -   | -    | -    | -    | -    | -    | -    | -    | - |
|         | rs3817184  | C/T | IVS      | N | -   | -   | -    | -    | -    | -    | -    | -    | -    | - |
| CYP4X1  | rs12141009 | C/T | IVS      | Y | 100 | 100 | 0.25 | 0.25 | 0.43 | 0.71 | 0.53 | 0.92 | 0.88 |   |



|        |            |     |          |   |     |     |      |      |      |      |      |      |      |   |
|--------|------------|-----|----------|---|-----|-----|------|------|------|------|------|------|------|---|
| FAM86A | rs1047523  | A/C | 3'UTR    | N | -   | -   | -    | -    | -    | -    | -    | -    | -    | - |
|        | rs17137622 | A/T | 3'UTR    | N | -   | -   | -    | -    | -    | -    | -    | -    | -    | - |
|        | rs9673733  | C/G | CDS      | N | -   | -   | -    | -    | -    | -    | -    | -    | -    | - |
|        | rs17137621 | G/A | 3'UTR    | N | -   | -   | -    | -    | -    | -    | -    | -    | -    | - |
| GNAT2  | rs2304355  | C/T | 5'UTR    | Y | 100 | 100 | 0.10 | 0.10 | 0.01 | -    | -    | -    | -    | - |
|        | rs3738766  | A/C | CDS      | Y | 99  | 100 | 0.18 | 0.18 | 0.81 | 0.78 | 0.55 | 0.86 | 0.96 |   |
| HAK    | rs9944810  | A/C | Promoter | Y | 99  | 100 | 0.43 | 0.41 | 0.70 | 0.58 | 0.20 | 0.64 | 0.26 |   |
|        | rs33910491 | C/T | CDS      | Y | 100 | 100 | 0.02 | 0.01 | 0.77 | -    | -    | -    | -    |   |
|        | rs3744867  | C/T | IVS      | Y | 100 | 100 | 0.32 | 0.33 | 0.92 | 0.78 | 0.90 | 0.71 | 0.74 |   |
|        | rs3809983  | G/T | CDS      | Y | 100 | 100 | 0.25 | 0.28 | 0.42 | 0.14 | 0.05 | 0.78 | 0.10 |   |
|        | rs3809977  | T/G | CDS      | N | -   | -   | -    | -    | -    | -    | -    | -    | -    |   |
| IMMP1L | rs2295748  | C/T | 5'UTR    | Y | 100 | 100 | 0.30 | 0.30 | 0.89 | 0.98 | 0.77 | 0.90 | 0.82 |   |
| MMP12  | rs652438   | A/G | CDS      | Y | 97  | 100 | 0.09 | 0.08 | 0.72 | 0.51 | 0.45 | 0.32 | 0.36 |   |
| MMP20  | rs17099008 | A/C | CDS      | Y | 99  | 100 | 0.11 | 0.12 | 0.15 | 0.55 | 0.42 | 0.87 | 0.47 |   |
|        | rs2245803  | A/C | CDS      | Y | 97  | 98  | 0.16 | 0.16 | 0.86 | 0.84 | 0.69 | 0.79 | 0.91 |   |
|        | rs2464356  | A/G | Promoter | Y | 100 | 100 | 0.08 | 0.09 | 0.75 | 0.38 | 0.27 | 0.25 | 0.19 |   |
|        | rs2464357  | G/A | Promoter | N | -   | -   | -    | -    | -    | -    | -    | -    | -    |   |
|        | rs2464358  | G/A | Promoter | N | -   | -   | -    | -    | -    | -    | -    | -    | -    |   |
|        | rs1784424  | T/G | CDS      | N | -   | -   | -    | -    | -    | -    | -    | -    | -    |   |
|        | rs1940050  | T/G | Promoter | N | -   | -   | -    | -    | -    | -    | -    | -    | -    |   |
|        | rs1784423  | G/A | CDS      | N | -   | -   | -    | -    | -    | -    | -    | -    | -    |   |
| MMP24  | rs3764733  | C/T | CDS      | Y | 100 | 100 | 0.09 | 0.10 | 0.48 | 0.61 | 0.41 | 0.35 | 0.33 |   |
| MMP27  | rs2509010  | C/T | CDS      | Y | 100 | 100 | 0.10 | 0.07 | 0.27 | 0.02 | 0.01 | 0.81 | 0.02 |   |
|        | rs12099177 | A/G | CDS      | N | -   | -   | -    | -    | -    | -    | -    | -    | -    |   |
|        | rs1939015  | A/G | CDS      | N | -   | -   | -    | -    | -    | -    | -    | -    | -    |   |
| NARG1L | rs6560982  | G/T | 3'UTR    | Y | 100 | 100 | 0.04 | 0.04 | 0.35 | -    | -    | -    | -    |   |
| NAT1   | rs10888150 | C/T | Promoter | Y | 100 | 100 | 0.47 | 0.47 | 0.04 | -    | -    | -    | -    |   |
|        | rs28359481 | C/T | Promoter | Y | 100 | 100 | 0.03 | 0.03 | 0.48 | -    | -    | -    | -    |   |
|        | rs7845127  | C/T | Promoter | N | -   | -   | -    | -    | -    | -    | -    | -    | -    |   |
| NAT2   | rs1799931  | A/G | CDS      | Y | 97  | 99  | 0.12 | 0.14 | 0.08 | 0.20 | 0.75 | 0.11 | 0.16 |   |
|        | rs1495744  | A/G | IVS      | Y | 100 | 100 | 0.03 | 0.02 | 0.64 | -    | -    | -    | -    |   |
|        | rs4271002  | C/G | Promoter | Y | 99  | 100 | 0.21 | 0.23 | 0.22 | 0.45 | 0.60 | 0.21 | 0.22 |   |
|        | rs4646242  | A/G | Promoter | Y | 100 | 100 | 0.22 | 0.20 | 0.22 | 0.49 | 0.32 | 0.50 | 0.28 |   |
|        | rs4646243  | C/T | Promoter | N | -   | -   | -    | -    | -    | -    | -    | -    | -    |   |
|        | rs4646246  | A/G | Promoter | N | -   | -   | -    | -    | -    | -    | -    | -    | -    |   |
|        | rs4345601  | A/T | Promoter | N | -   | -   | -    | -    | -    | -    | -    | -    | -    |   |
|        | rs4646244  | T/A | Promoter | N | -   | -   | -    | -    | -    | -    | -    | -    | -    |   |
| NAT8B  | rs2001490  | C/G | CDS      | Y | 100 | 100 | 0.36 | 0.35 | 0.03 | -    | -    | -    | -    |   |
|        | rs4852974  | G/A | CDS      | N | -   | -   | -    | -    | -    | -    | -    | -    | -    |   |
| NAT9   | rs2305213  | C/T | CDS      | Y | 100 | 100 | 0.04 | 0.04 | 0.34 | -    | -    | -    | -    |   |
| NAT11  | rs873928   | C/G | 5'UTR    | N | -   | -   | -    | -    | -    | -    | -    | -    | -    |   |
| NAT13  | rs1048892  | C/T | 5'UTR    | Y | 100 | 100 | 0.46 | 0.45 | 0.42 | 0.70 | 0.56 | 0.88 | 0.82 |   |

p53 Signaling Pathway  
(n=38)

|         |            |     |          |   |     |     |      |      |      |      |      |      |      |
|---------|------------|-----|----------|---|-----|-----|------|------|------|------|------|------|------|
| NMNAT1  | rs1234694  | A/G | Promoter | Y | 86  | 84  | 0.37 | 0.39 | 0.77 | -    | -    | -    | -    |
| OLFM2   | rs11556087 | C/T | CDS      | Y | 96  | 97  | 0.00 | 0.00 | -    | -    | -    | -    | -    |
|         | rs2303100  | T/C | CDS      | N | -   | -   | -    | -    | -    | -    | -    | -    | -    |
| PPEF1   | rs17247243 | A/G | Promoter | Y | 96  | 96  | 0.35 | 0.30 | 0.00 | -    | -    | -    | -    |
| PPIC    | rs28373879 | C/G | 5'UTR    | N | -   | -   | -    | -    | -    | -    | -    | -    | -    |
| PPIE    | rs1046988  | C/T | 3'UTR    | Y | 100 | 100 | 0.25 | 0.26 | 0.72 | 0.79 | 0.67 | 0.62 | 0.89 |
| PPIL1   | None       | -   | -        | - | -   | -   | -    | -    | -    | -    | -    | -    | -    |
| SLC38A4 | rs11183610 | G/A | CDS      | Y | 100 | 100 | 0.07 | 0.06 | 0.14 | 0.03 | 0.15 | 0.97 | 0.32 |
|         | rs180438   | A/G | IVS      | Y | 100 | 100 | 0.42 | 0.44 | 0.19 | 0.28 | 0.97 | 0.10 | 0.38 |
|         | rs2429467  | C/T | CDS      | Y | 100 | 100 | 0.22 | 0.26 | 0.10 | 0.03 | 0.01 | 0.06 | 0.01 |
| SLC6A2  | rs1805066  | A/G | CDS      | N | -   | -   | -    | -    | -    | -    | -    | -    | -    |
| SMCR7   | rs12603700 | G/A | 3'UTR    | N | -   | -   | -    | -    | -    | -    | -    | -    | -    |
| SMYD4   | rs3809875  | C/G | CDS      | Y | 99  | 99  | 0.22 | 0.22 | 0.33 | 0.28 | 0.58 | 0.18 | 0.98 |
|         | rs7224496  | A/C | CDS      | Y | 100 | 100 | 0.26 | 0.26 | 0.21 | 0.99 | 0.89 | 0.84 | 0.83 |
|         | rs9902398  | C/T | CDS      | N | -   | -   | -    | -    | -    | -    | -    | -    | -    |
|         | rs9913923  | C/T | CDS      | Y | 100 | 100 | 0.08 | 0.09 | 0.17 | 0.22 | 0.23 | 0.24 | 0.37 |
| TDRD5   | rs16854429 | G/T | IVS      | Y | 99  | 100 | 0.33 | 0.33 | 0.16 | 0.82 | 0.90 | 0.66 | 0.77 |
|         | rs1999068  | A/G | Promoter | Y | 99  | 96  | 0.40 | 0.39 | 0.04 | -    | -    | -    | -    |
|         | rs6704505  | A/G | CDS      | N | -   | -   | -    | -    | -    | -    | -    | -    | -    |
| ZNF554  | rs867168   | G/A | CDS      | N | -   | -   | -    | -    | -    | -    | -    | -    | -    |
|         | rs867169   | G/A | CDS      | N | -   | -   | -    | -    | -    | -    | -    | -    | -    |
|         | rs1001814  | C/T | Promoter | Y | 100 | 100 | 0.15 | 0.17 | 0.03 | -    | -    | -    | -    |
| AATF    | rs11653434 | C/T | 3'UTR    | Y | 97  | 97  | 0.00 | 0.00 | -    | -    | -    | -    | -    |
|         | rs7216758  | G/T | Promoter | Y | 100 | 100 | 0.01 | 0.01 | 0.71 | -    | -    | -    | -    |
|         | rs15038    | A/T | Promoter | Y | 93  | 95  | 0.00 | 0.00 | -    | -    | -    | -    | -    |
| BAP1    | rs35353781 | A/T | CDS      | N | -   | -   | -    | -    | -    | -    | -    | -    | -    |
|         | rs3753793  | G/T | Promoter | Y | 100 | 99  | 0.37 | 0.35 | 0.77 | 0.67 | 0.37 | 0.67 | 0.45 |
|         | rs3753794  | C/T | Promoter | Y | 97  | 95  | 0.34 | 0.33 | 0.70 | 0.75 | 0.42 | 0.80 | 0.47 |
| CYR61   | rs2297140  | C/A | 5'UTR    | N | -   | -   | -    | -    | -    | -    | -    | -    | -    |
|         | rs2073525  | A/G | Promoter | N | -   | -   | -    | -    | -    | -    | -    | -    | -    |
|         | rs4627097  | A/G | CDS      | Y | 0   | 0   | -    | -    | -    | -    | -    | -    | -    |
| FRAP1   | rs12122575 | C/T | IVS      | Y | 92  | 90  | 0.10 | 0.06 | 0.90 | -    | -    | -    | -    |
|         | rs17036508 | C/T | 3'UTR    | Y | 100 | 100 | 0.12 | 0.10 | 0.34 | 0.14 | 0.08 | 0.17 | 0.09 |
|         | rs28990992 | C/G | CDS      | N | -   | -   | -    | -    | -    | -    | -    | -    | -    |
|         | rs2295079  | G/C | 5'UTR    | N | -   | -   | -    | -    | -    | -    | -    | -    | -    |
| GAK     | rs2295080  | G/T | Promoter | N | -   | -   | -    | -    | -    | -    | -    | -    | -    |
|         | rs1134921  | T/C | CDS      | N | -   | -   | -    | -    | -    | -    | -    | -    | -    |
|         | rs2306242  | T/C | CDS      | N | -   | -   | -    | -    | -    | -    | -    | -    | -    |
|         | rs2306248  | G/A | IVS      | N | -   | -   | -    | -    | -    | -    | -    | -    | -    |
| HDAC1   | rs1741981  | C/T | Promoter | N | -   | -   | -    | -    | -    | -    | -    | -    | -    |
| HK2     | rs2229629  | A/G | CDS      | N | -   | -   | -    | -    | -    | -    | -    | -    | -    |
|         | rs608112   | G/A | Promoter | Y | 100 | 100 | 0.24 | 0.29 | 0.83 | 0.04 | 0.06 | 0.06 | 0.02 |

|          |            |       |          |   |     |     |      |      |      |        |      |       |      |
|----------|------------|-------|----------|---|-----|-----|------|------|------|--------|------|-------|------|
|          | rs619850   | T/C   | Promoter | Y | 100 | 100 | 0.31 | 0.36 | 0.06 | 0.01   | 0.15 | 0.00  | 0.01 |
|          | rs2229621  | A/T   | CDS      | N | -   | -   | -    | -    | -    | -      | -    | -     | -    |
|          | rs3732299  | A/T   | CDS      | N | -   | -   | -    | -    | -    | -      | -    | -     | -    |
| LRDD     | rs10902221 | C/T   | CDS      | N | -   | -   | -    | -    | -    | -      | -    | -     | -    |
| MDM4     | rs3789052  | A/G   | IVS      | Y | 100 | 100 | 0.35 | 0.36 | 0.35 | 0.24   | 0.48 | 0.23  | 0.60 |
|          | rs4245739  | A/C   | 3'UTR    | N | -   | -   | -    | -    | -    | -      | -    | -     | -    |
| MYOD1    | rs3911833  | G/A   | Promoter | N | -   | -   | -    | -    | -    | -      | -    | -     | -    |
| NFI      | None       | -     | -        | - | -   | -   | -    | -    | -    | -      | -    | -     | -    |
| P53AIP1  | rs35942033 | C/T   | CDS      | Y | 98  | 98  | 0.01 | 0.00 | 0.98 | -      | -    | -     | -    |
|          | rs3806786  | C/T   | Promoter | Y | 100 | 100 | 0.40 | 0.35 | 0.55 | 0.10   | 0.06 | 0.10  | 0.03 |
|          | rs3806787  | A/C   | Promoter | N | -   | -   | -    | -    | -    | -      | -    | -     | -    |
|          | rs3740834  | C/T   | Promoter | N | -   | -   | -    | -    | -    | -      | -    | -     | -    |
| PCAF     | rs17006625 | A/G   | CDS      | Y | 100 | 100 | 0.17 | 0.19 | 0.18 | 0.39   | 0.33 | 0.31  | 0.24 |
| PHB      | rs2233659  | C/A   | Promoter | N | -   | -   | -    | -    | -    | -      | -    | -     | -    |
| PLAGL1   | rs2076684  | G/C   | IVS      | N | -   | -   | -    | -    | -    | -      | -    | -     | -    |
| PMP22    | rs13422    | A/C   | 3'UTR    | Y | 100 | 100 | 0.34 | 0.32 | 0.26 | 0.22   | 0.70 | 0.12  | 0.33 |
|          | rs231017   | G/C   | Promoter | N | -   | -   | -    | -    | -    | -      | -    | -     | -    |
| PPM1D    | rs16944534 | A/C   | Promoter | N | -   | -   | -    | -    | -    | -      | -    | -     | -    |
| PPP1R13B | None       | -     | -        | - | -   | -   | -    | -    | -    | -      | -    | -     | -    |
| PPP1R13L | rs10412761 | A/G   | Promoter | Y | 99  | 99  | 0.24 | 0.24 | 0.60 | 0.92   | 0.71 | 0.86  | 1.00 |
|          | rs1005165  | C/T   | Promoter | N | -   | -   | -    | -    | -    | -      | -    | -     | -    |
|          | rs11882644 | C/T   | Promoter | N | -   | -   | -    | -    | -    | -      | -    | -     | -    |
| PRKCA    | rs3764402  | A/G   | Promoter | Y | 97  | 99  | 0.08 | 0.06 | 0.88 | 0.33   | 0.14 | 0.99  | 0.16 |
| PRKCQ    | rs2236379  | G/A   | CDS      | N | -   | -   | -    | -    | -    | -      | -    | -     | -    |
| RELA     | rs12721575 | T/C/A | CDS      | N | -   | -   | -    | -    | -    | -      | -    | -     | -    |
| RPRM     | rs2033764  | A/G   | Promoter | Y | 95  | 98  | 0.30 | 0.29 | 0.35 | 0.21   | 0.43 | 0.15  | 0.41 |
| SCGB3A1  | rs307802   | T/C   | Promoter | Y | 98  | 98  | 0.29 | 0.30 | 0.49 | 0.0004 | 0.24 | 0.002 | 0.73 |
| SESN2    | rs2274848  | C/T   | CDS      | Y | 100 | 100 | 0.10 | 0.09 | 0.45 | 0.47   | 0.51 | 0.25  | 0.22 |
|          | rs580800   | C/T   | Promoter | Y | 99  | 100 | 0.10 | 0.10 | 0.82 | 0.57   | 0.29 | 0.56  | 0.44 |
| SESN3    | rs11021065 | G/T   | IVS      | Y | 100 | 100 | 0.22 | 0.22 | 0.33 | 0.71   | 0.96 | 0.44  | 0.74 |
| SHC1     | rs8191981  | C/T   | CDS      | Y | 98  | 98  | 0.09 | 0.08 | 0.78 | 0.43   | 0.28 | 0.69  | 0.33 |
| SIRT1    | rs12778366 | C/T   | Promoter | Y | 100 | 100 | 0.11 | 0.11 | 0.16 | 0.94   | 0.95 | 0.72  | 0.74 |
|          | rs35706870 | A/C   | Promoter | Y | 98  | 94  | 0.00 | 0.00 | -    | -      | -    | -     | -    |
|          | rs36107781 | C/T   | IVS      | Y | 100 | 100 | 0.00 | 0.00 | -    | -      | -    | -     | -    |
|          | rs3740051  | A/G   | Promoter | Y | 100 | 99  | 0.27 | 0.31 | 0.62 | 0.08   | 0.05 | 0.08  | 0.02 |
|          | rs3758391  | C/T   | Promoter | N | -   | -   | -    | -    | -    | -      | -    | -     | -    |
|          | rs2394443  | G/C   | Promoter | N | -   | -   | -    | -    | -    | -      | -    | -     | -    |
|          | rs3740053  | A/G   | Promoter | N | -   | -   | -    | -    | -    | -      | -    | -     | -    |
|          | rs932658   | C/A   | Promoter | N | -   | -   | -    | -    | -    | -      | -    | -     | -    |
| SMARCB1  | rs11090285 | C/T   | 5'UTR    | N | -   | -   | -    | -    | -    | -      | -    | -     | -    |
|          | rs2073387  | G/T   | Promoter | N | -   | -   | -    | -    | -    | -      | -    | -     | -    |
| SNCA     | rs2301134  | C/T   | Promoter | Y | 100 | 100 | 0.10 | 0.09 | 0.13 | 0.51   | 0.19 | 0.93  | 0.23 |







|         |            |     |          |   |     |     |      |      |      |      |      |      |      |
|---------|------------|-----|----------|---|-----|-----|------|------|------|------|------|------|------|
|         | rs5355     | C/T | CDS      | Y | 100 | 100 | 0.06 | 0.05 | 0.72 | 0.49 | 0.41 | 0.33 | 0.33 |
|         | rs5368     | C/T | CDS      | Y | 100 | 100 | 0.21 | 0.21 | 0.40 | 0.99 | 0.91 | 0.88 | 0.88 |
| SELPLG  | rs3917390  | G/C | Promoter | N | -   | -   | -    | -    | -    | -    | -    | -    | -    |
|         | rs2228315  | T/C | CDS      | N | -   | -   | -    | -    | -    | -    | -    | -    | -    |
|         | rs7311687  | A/C | 3'UTR    | N | -   | -   | -    | -    | -    | -    | -    | -    | -    |
|         | rs8179106  | C/T | Promoter | Y | 100 | 99  | 0.14 | 0.15 | 0.44 | 0.25 | 0.47 | 0.29 | 0.47 |
|         | rs8179107  | A/G | Promoter | Y | 100 | 100 | 0.05 | 0.05 | 0.80 | -    | -    | -    | -    |
|         | rs7137098  | A/T | IVS      | N | -   | -   | -    | -    | -    | -    | -    | -    | -    |
|         | rs7306237  | A/C | IVS      | N | -   | -   | -    | -    | -    | -    | -    | -    | -    |
|         | rs8179139  | T/C | IVS      | N | -   | -   | -    | -    | -    | -    | -    | -    | -    |
|         | rs8179140  | G/A | IVS      | N | -   | -   | -    | -    | -    | -    | -    | -    | -    |
|         | rs8179141  | G/A | IVS      | N | -   | -   | -    | -    | -    | -    | -    | -    | -    |
| SEMA4B  | rs3751655  | T/G | CDS      | N | -   | -   | -    | -    | -    | -    | -    | -    | -    |
|         | rs4932305  | A/G | CDS      | N | -   | -   | -    | -    | -    | -    | -    | -    | -    |
| SH3GL3  | rs2585055  | G/A | IVS      | N | -   | -   | -    | -    | -    | -    | -    | -    | -    |
|         | rs17158811 | G/A | IVS      | N | -   | -   | -    | -    | -    | -    | -    | -    | -    |
|         | rs2201101  | G/T | IVS      | N | -   | -   | -    | -    | -    | -    | -    | -    | -    |
|         | rs2730096  | C/G | IVS      | N | -   | -   | -    | -    | -    | -    | -    | -    | -    |
| STRA6   | rs736118   | C/T | CDS      | Y | 99  | 100 | 0.34 | 0.35 | 0.42 | 0.64 | 0.55 | 0.73 | 0.80 |
| TANK    | rs3769969  | C/T | CDS      | Y | 98  | 98  | 0.04 | 0.04 | 0.34 | -    | -    | -    | -    |
|         | rs979415   | A/G | Promoter | Y | 100 | 100 | 0.20 | 0.20 | 0.45 | 0.95 | 0.88 | 0.88 | 0.85 |
| TBC1D2B | rs4886992  | C/T | IVS      | N | -   | -   | -    | -    | -    | -    | -    | -    | -    |
| TCF7    | rs30489    | G/A | IVS      | N | -   | -   | -    | -    | -    | -    | -    | -    | -    |
|         | rs173424   | G/A | Promoter | N | -   | -   | -    | -    | -    | -    | -    | -    | -    |
| TFRC    | rs17091585 | G/T | IVS      | Y | 98  | 99  | 0.08 | 0.07 | 0.96 | 0.42 | 0.22 | 0.98 | 0.25 |
|         | rs35587059 | C/T | IVS      | Y | 97  | 96  | 0.21 | 0.18 | 0.45 | 0.25 | 0.47 | 0.12 | 0.12 |
|         | rs17091657 | C/G | Promoter | Y | 100 | 100 | 0.08 | 0.07 | 0.68 | 0.54 | 0.35 | 0.67 | 0.33 |
|         | rs3817672  | A/G | CDS      | Y | 100 | 100 | 0.19 | 0.17 | 0.49 | 0.33 | 0.74 | 0.14 | 0.16 |
|         | rs11915082 | G/A | Promoter | N | -   | -   | -    | -    | -    | -    | -    | -    | -    |
|         | rs17091582 | C/A | IVS      | N | -   | -   | -    | -    | -    | -    | -    | -    | -    |
|         | rs3827554  | C/A | Promoter | N | -   | -   | -    | -    | -    | -    | -    | -    | -    |
|         | rs3827555  | C/G | Promoter | N | -   | -   | -    | -    | -    | -    | -    | -    | -    |
| TMEPAI  | rs911157   | C/T | 5'UTR    | Y | 90  | 89  | 0.06 | 0.07 | 0.83 | -    | -    | -    | -    |
|         | rs2273534  | C/T | IVS      | N | -   | -   | -    | -    | -    | -    | -    | -    | -    |
| TP53I3  | rs33972312 | G/A | Promoter | N | -   | -   | -    | -    | -    | -    | -    | -    | -    |
| TRIM25  | rs205498   | G/A | CDS      | N | -   | -   | -    | -    | -    | -    | -    | -    | -    |
| UBA1    | rs11558783 | A/G | CDS      | N | -   | -   | -    | -    | -    | -    | -    | -    | -    |
| VCAM1   | rs1041163  | C/T | Promoter | N | -   | -   | -    | -    | -    | -    | -    | -    | -    |
| WISP1   | None       | -   | -        | - | -   | -   | -    | -    | -    | -    | -    | -    | -    |
| WISP2   | None       | -   | -        | - | -   | -   | -    | -    | -    | -    | -    | -    | -    |
| WISP3   | rs1230345  | T/G | CDS      | N | -   | -   | -    | -    | -    | -    | -    | -    | -    |
| WNT1    | rs4760662  | C/T | Promoter | Y | 95  | 94  | 0.49 | 0.50 | 0.97 | -    | -    | -    | -    |

Stem Cell  
(n=142)

|         |            |     |          |   |     |     |      |      |      |      |      |      |      |   |
|---------|------------|-----|----------|---|-----|-----|------|------|------|------|------|------|------|---|
| WNT2    | rs39315    | C/T | Promoter | N | -   | -   | -    | -    | -    | -    | -    | -    | -    | - |
| WSB1    | rs9303634  | C/T | CDS      | Y | 100 | 100 | 0.25 | 0.24 | 0.77 | 0.46 | 0.61 | 0.35 | 0.57 |   |
| ZNF592  | rs2115629  | C/A | IVS      | N | -   | -   | -    | -    | -    | -    | -    | -    | -    | - |
| ABCG2   | rs1564481  | C/T | IVS      | Y | 100 | 100 | 0.40 | 0.37 | 0.63 | 0.35 | 0.20 | 0.27 | 0.14 |   |
|         | rs2231138  | A/G | IVS      | Y | 100 | 100 | 0.10 | 0.10 | 0.45 | 0.23 | 0.54 | 0.13 | 0.88 |   |
|         | rs2231142  | A/C | CDS      | Y | 99  | 99  | 0.25 | 0.28 | 0.58 | 0.40 | 0.83 | 0.22 | 0.28 |   |
|         | rs2231137  | T/C | CDS      | N | -   | -   | -    | -    | -    | -    | -    | -    | -    | - |
| ACTC1   | rs16959824 | G/A | Promoter | N | -   | -   | -    | -    | -    | -    | -    | -    | -    | - |
|         | rs525720   | A/G | Promoter | Y | 98  | 98  | 0.12 | 0.11 | 0.58 | 0.82 | 0.73 | 0.61 | 0.58 |   |
| ADAM17  | rs12692386 | G/A | 5'UTR    | N | -   | -   | -    | -    | -    | -    | -    | -    | -    | - |
| ADAR    | rs2229857  | A/G | CDS      | Y | 100 | 100 | 0.29 | 0.27 | 0.70 | 0.35 | 0.16 | 0.40 | 0.21 |   |
|         | rs3738031  | C/T | IVS      | Y | 100 | 100 | 0.10 | 0.09 | 0.75 | 0.65 | 0.44 | 0.77 | 0.51 |   |
|         | rs28411375 | C/T | Promoter | Y | 100 | 100 | 0.16 | 0.14 | 1.00 | 0.29 | 0.22 | 0.18 | 0.12 |   |
|         | rs7533471  | A/G | Promoter | Y | 95  | 99  | 0.16 | 0.14 | 0.96 | -    | -    | -    | -    | - |
|         | rs884617   | C/T | Promoter | Y | 0   | 0   | -    | -    | -    | -    | -    | -    | -    | - |
|         | rs884618   | G/A | 5'UTR    | N | -   | -   | -    | -    | -    | -    | -    | -    | -    | - |
|         | rs3738030  | C/A | IVS      | N | -   | -   | -    | -    | -    | -    | -    | -    | -    | - |
| AFP     | rs12651581 | C/T | Promoter | Y | 100 | 100 | 0.13 | 0.15 | 0.32 | 0.25 | 0.94 | 0.12 | 0.16 |   |
|         | rs4024     | A/G | Promoter | Y | 98  | 99  | 0.44 | 0.44 | 0.11 | 0.28 | 0.48 | 0.33 | 0.94 |   |
|         | rs4446279  | C/G | Promoter | Y | 100 | 100 | 0.28 | 0.27 | 0.61 | 0.48 | 0.25 | 0.67 | 0.45 |   |
| ALDH1A1 | rs348445   | C/T | Promoter | Y | 100 | 100 | 0.05 | 0.05 | 0.11 | -    | -    | -    | -    | - |
| ALDH2   | rs671      | A/G | CDS      | Y | 100 | 100 | 0.16 | 0.17 | 0.20 | 0.49 | 0.23 | 0.39 | 0.27 |   |
|         | rs886205   | C/T | 5'UTR    | Y | 97  | 96  | 0.17 | 0.17 | 0.87 | 0.98 | 0.85 | 0.87 | 0.83 |   |
| ALPI    | rs3762519  | C/T | 5'UTR    | Y | 100 | 99  | 0.09 | 0.08 | 0.16 | 0.14 | 0.45 | 0.15 | 0.31 |   |
|         | rs6721457  | C/G | Promoter | Y | 91  | 95  | 0.06 | 0.08 | 0.30 | -    | -    | -    | -    | - |
| ALPL    | rs3200254  | C/T | IVS      | Y | 100 | 100 | 0.50 | 0.50 | 0.35 | 0.83 | 0.82 | 0.62 | 0.87 |   |
|         | rs1697405  | C/T | 3'UTR    | N | -   | -   | -    | -    | -    | -    | -    | -    | -    | - |
|         | rs950922   | C/T | IVS      | Y | 85  | 89  | 0.45 | 0.45 | 0.73 | -    | -    | -    | -    | - |
|         | rs34605986 | C/T | CDS      | Y | 98  | 98  | 0.00 | 0.00 | -    | -    | -    | -    | -    | - |
|         | rs3738099  | C/T | CDS      | N | -   | -   | -    | -    | -    | -    | -    | -    | -    | - |
| ALPP    | rs13026692 | A/T | CDS      | N | -   | -   | -    | -    | -    | -    | -    | -    | -    | - |
|         | rs1048994  | A/G | CDS      | N | -   | -   | -    | -    | -    | -    | -    | -    | -    | - |
|         | rs2853378  | A/G | CDS      | N | -   | -   | -    | -    | -    | -    | -    | -    | -    | - |
|         | rs3762524  | C/A | Promoter | N | -   | -   | -    | -    | -    | -    | -    | -    | -    | - |
|         | rs3762526  | A/C | Promoter | N | -   | -   | -    | -    | -    | -    | -    | -    | -    | - |
|         | rs1130335  | C/T | CDS      | N | -   | -   | -    | -    | -    | -    | -    | -    | -    | - |
| ALPPL2  | rs1048999  | A/G | CDS      | N | -   | -   | -    | -    | -    | -    | -    | -    | -    | - |
|         | rs17416141 | C/A | CDS      | N | -   | -   | -    | -    | -    | -    | -    | -    | -    | - |
|         | rs1048983  | G/C | CDS      | N | -   | -   | -    | -    | -    | -    | -    | -    | -    | - |
| APC     | rs1804197  | A/C | 3'UTR    | Y | 100 | 100 | 0.11 | 0.09 | 0.50 | 0.13 | 0.05 | 0.57 | 0.29 |   |
|         | rs2464810  | C/T | Promoter | Y | 100 | 100 | 0.00 | 0.00 | -    | -    | -    | -    | -    | - |
|         | rs459552   | A/T | CDS      | Y | 100 | 100 | 0.09 | 0.08 | 0.22 | 0.77 | 0.59 | 0.84 | 0.90 |   |



|       |            |     |          |   |     |     |      |      |      |       |      |       |       |   |
|-------|------------|-----|----------|---|-----|-----|------|------|------|-------|------|-------|-------|---|
| APH1A | rs2275780  | G/T | 5'UTR    | N | -   | -   | -    | -    | -    | -     | -    | -     | -     | - |
|       | rs3754048  | G/C | Promoter | N | -   | -   | -    | -    | -    | -     | -    | -     | -     | - |
| APH1B | rs1047552  | G/T | CDS      | Y | 98  | 99  | 0.20 | 0.21 | 0.78 | 0.50  | 0.17 | 0.78  | 0.48  |   |
|       | rs3784671  | G/T | Promoter | Y | 100 | 100 | 0.24 | 0.24 | 0.03 | -     | -    | -     | -     |   |
| ASCL2 | rs3784672  | A/C | Promoter | Y | 100 | 100 | 0.11 | 0.11 | 0.16 | 0.07  | 0.11 | 0.62  | 0.97  |   |
|       | rs11022026 | A/C | Promoter | N | -   | -   | -    | -    | -    | -     | -    | -     | -     |   |
|       | rs968528   | T/A | 5'UTR    | N | -   | -   | -    | -    | -    | -     | -    | -     | -     |   |
| AXIN1 | None       | -   | -        | - | -   | -   | -    | -    | -    | -     | -    | -     | -     |   |
| BAMBI | rs3758362  | C/G | Promoter | Y | 100 | 100 | 0.08 | 0.10 | 0.97 | 0.40  | 0.31 | 0.26  | 0.20  |   |
|       | rs3758365  | G/C | Promoter | N | -   | -   | -    | -    | -    | -     | -    | -     | -     |   |
|       | rs610820   | A/T | Promoter | N | -   | -   | -    | -    | -    | -     | -    | -     | -     |   |
| BMP2K | rs2288255  | C/T | CDS      | Y | 100 | 100 | 0.23 | 0.23 | 0.75 | 0.92  | 0.94 | 0.66  | 0.83  |   |
| BMP8A | rs2230007  | A/G | 3'UTR    | N | -   | -   | -    | -    | -    | -     | -    | -     | -     |   |
|       | rs6525     | A/G | CDS      | N | -   | -   | -    | -    | -    | -     | -    | -     | -     |   |
|       | rs2230006  | G/A | 3'UTR    | N | -   | -   | -    | -    | -    | -     | -    | -     | -     |   |
| BMPER | rs4723342  | C/T | Promoter | N | -   | -   | -    | -    | -    | -     | -    | -     | -     |   |
| BMPR2 | None       | -   | -        | - | -   | -   | -    | -    | -    | -     | -    | -     | -     |   |
| BTRC  | rs10883617 | C/T | Promoter | Y | 100 | 100 | 0.14 | 0.16 | 0.21 | 0.39  | 0.75 | 0.20  | 0.29  |   |
|       | rs6584429  | C/G | IVS      | Y | 83  | 90  | 0.37 | 0.40 | 0.31 | -     | -    | -     | -     |   |
| CD3D  | rs3181259  | C/T | Promoter | Y | 100 | 100 | 0.42 | 0.46 | 0.04 | -     | -    | -     | -     |   |
|       | rs7947185  | T/C | Promoter | Y | 100 | 100 | 0.21 | 0.16 | 0.46 | 0.001 | 0.01 | 0.002 | 0.001 |   |
| CD3E  | rs2231439  | A/G | Promoter | Y | 100 | 100 | 0.30 | 0.26 | 0.19 | 0.04  | 0.04 | 0.02  | 0.01  |   |
|       | rs2231440  | A/G | Promoter | Y | 94  | 95  | 0.21 | 0.22 | 0.50 | -     | -    | -     | -     |   |
|       | rs3825051  | A/G | Promoter | N | -   | -   | -    | -    | -    | -     | -    | -     | -     |   |
|       | rs2231449  | C/A | 3'UTR    | N | -   | -   | -    | -    | -    | -     | -    | -     | -     |   |
| CD4   | rs11064391 | A/C | Promoter | Y | 91  | 91  | 0.39 | 0.34 | 0.00 | -     | -    | -     | -     |   |
|       | rs2855534  | C/G | Promoter | N | -   | -   | -    | -    | -    | -     | -    | -     | -     |   |
|       | rs28919570 | C/T | CDS      | N | -   | -   | -    | -    | -    | -     | -    | -     | -     |   |
|       | rs28989521 | C/T | Promoter | N | -   | -   | -    | -    | -    | -     | -    | -     | -     |   |
|       | rs16932921 | T/A | 3'UTR    | N | -   | -   | -    | -    | -    | -     | -    | -     | -     |   |
|       | rs17516063 | G/C | Promoter | N | -   | -   | -    | -    | -    | -     | -    | -     | -     |   |
|       | rs2515733  | C/T | Promoter | N | -   | -   | -    | -    | -    | -     | -    | -     | -     |   |
|       | rs2269354  | A/G | IVS      | N | -   | -   | -    | -    | -    | -     | -    | -     | -     |   |
|       | rs2857226  | C/T | IVS      | N | -   | -   | -    | -    | -    | -     | -    | -     | -     |   |
| CD8A  | rs6743139  | A/G | Promoter | Y | 100 | 100 | 0.12 | 0.11 | 0.36 | 0.78  | 0.70 | 0.66  | 0.62  |   |
| CD8B  | rs4072106  | G/A | Promoter | N | -   | -   | -    | -    | -    | -     | -    | -     | -     |   |
|       | rs4514875  | C/T | IVS      | N | -   | -   | -    | -    | -    | -     | -    | -     | -     |   |
|       | rs4971889  | A/T | Promoter | N | -   | -   | -    | -    | -    | -     | -    | -     | -     |   |
| CD19  | rs2904880  | C/G | CDS      | Y | 97  | 96  | 0.11 | 0.09 | 0.91 | 0.36  | 0.67 | 0.17  | 0.17  |   |
| CD247 | rs16859125 | A/T | Promoter | Y | 0   | 0   | -    | -    | -    | -     | -    | -     | -     |   |
|       | rs2984800  | C/T | Promoter | Y | 99  | 100 | 0.13 | 0.13 | 0.49 | 0.60  | 0.85 | 0.39  | 0.95  |   |
|       | rs3820390  | C/T | Promoter | Y | 100 | 100 | 0.11 | 0.13 | 0.79 | 0.45  | 0.22 | 0.74  | 0.24  |   |







|           |            |       |          |   |     |     |      |      |      |       |       |      |       |   |
|-----------|------------|-------|----------|---|-----|-----|------|------|------|-------|-------|------|-------|---|
| HDAC9     | None       | -     | -        | - | -   | -   | -    | -    | -    | -     | -     | -    | -     | - |
| HES5      | rs2494603  | C/T   | Promoter | N | -   | -   | -    | -    | -    | -     | -     | -    | -     | - |
| HNF4A     | rs1800963  | A/C   | Promoter | Y | 87  | 88  | 0.30 | 0.30 | 0.01 | -     | -     | -    | -     | - |
| HSPA9     | rs35091799 | C/G   | CDS      | Y | 94  | 96  | 0.02 | 0.00 | 0.97 | -     | -     | -    | -     | - |
| IHH       | rs437512   | A/G   | Promoter | Y | 100 | 100 | 0.47 | 0.46 | 0.76 | 0.86  | 0.85  | 0.67 | 0.71  | - |
| KITLG     | rs869408   | A/T   | Promoter | Y | 82  | 81  | 0.22 | 0.23 | 0.00 | -     | -     | -    | -     | - |
|           | rs12721563 | T/C/A | CDS      | N | -   | -   | -    | -    | -    | -     | -     | -    | -     | - |
| LIFR      | rs2071233  | C/T   | Promoter | Y | 100 | 100 | 0.15 | 0.15 | 0.84 | 0.86  | 0.97  | 0.78 | 0.79  | - |
|           | rs2071236  | C/T   | Promoter | Y | 100 | 100 | 0.33 | 0.37 | 0.49 | 0.22  | 0.23  | 0.10 | 0.10  | - |
|           | rs2071237  | C/G   | Promoter | Y | 96  | 95  | 0.42 | 0.39 | 0.06 | 0.34  | 0.29  | 0.34 | 0.22  | - |
|           | rs3729740  | A/G   | CDS      | Y | 100 | 100 | 0.23 | 0.22 | 0.03 | -     | -     | -    | -     | - |
| LIN28     | rs4659441  | C/T   | 3'UTR    | N | -   | -   | -    | -    | -    | -     | -     | -    | -     | - |
| MAML1     | None       | -     | -        | - | -   | -   | -    | -    | -    | -     | -     | -    | -     | - |
| MAML2     | rs12791333 | C/T   | Promoter | Y | 100 | 100 | 0.34 | 0.32 | 0.96 | 0.61  | 0.34  | 0.50 | 0.30  | - |
|           | rs11021542 | C/G   | 5'UTR    | N | -   | -   | -    | -    | -    | -     | -     | -    | -     | - |
| MAP3K7    | rs282071   | C/T   | Promoter | Y | 99  | 99  | 0.43 | 0.42 | 0.60 | 0.90  | 0.70  | 0.81 | 0.69  | - |
| MAP3K7IP1 | rs35515473 | A/G   | Promoter | Y | 95  | 97  | 0.00 | 0.00 | -    | -     | -     | -    | -     | - |
|           | rs4821892  | C/G   | Promoter | N | -   | -   | -    | -    | -    | -     | -     | -    | -     | - |
| MEF2A     | None       | -     | -        | - | -   | -   | -    | -    | -    | -     | -     | -    | -     | - |
| MFNG      | rs2071839  | A/G   | Promoter | N | -   | -   | -    | -    | -    | -     | -     | -    | -     | - |
| MS4A1     | rs11230333 | G/A   | Promoter | Y | 99  | 99  | 0.17 | 0.21 | 0.07 | 0.004 | 0.001 | 0.48 | 0.003 | - |
|           | rs4939362  | A/G   | Promoter | Y | 100 | 100 | 0.35 | 0.36 | 0.28 | 0.95  | 0.77  | 0.98 | 0.84  | - |
| MSX1      | rs8670     | C/T   | 3'UTR    | N | -   | -   | -    | -    | -    | -     | -     | -    | -     | - |
| MYF5      | rs3759084  | G/T   | Promoter | Y | 100 | 100 | 0.23 | 0.27 | 0.19 | 0.08  | 0.45  | 0.03 | 0.04  | - |
|           | rs1163261  | G/A   | 5'UTR    | N | -   | -   | -    | -    | -    | -     | -     | -    | -     | - |
| MYF6      | rs7312846  | C/T   | Promoter | Y | 100 | 100 | 0.05 | 0.05 | 0.07 | 1.00  | 0.90  | 0.91 | 0.89  | - |
| MYST3     | rs7006698  | A/T   | 5'UTR    | Y | 89  | 89  | 0.32 | 0.34 | 0.09 | -     | -     | -    | -     | - |
| NANOG     | rs3812816  | C/G   | Promoter | Y | 99  | 97  | 0.08 | 0.07 | 0.06 | 0.14  | 0.97  | 0.98 | 0.74  | - |
| NCOR2     | rs872224   | G/C   | 5'UTR    | N | -   | -   | -    | -    | -    | -     | -     | -    | -     | - |
|           | rs2227277  | T/C   | CDS      | N | -   | -   | -    | -    | -    | -     | -     | -    | -     | - |
|           | rs2229840  | T/C   | CDS      | N | -   | -   | -    | -    | -    | -     | -     | -    | -     | - |
| NCSTN     | rs1324738  | A/G   | Promoter | Y | 98  | 99  | 0.08 | 0.10 | 0.80 | 0.50  | 0.55  | 0.25 | 0.23  | - |
|           | rs2147471  | G/T   | Promoter | Y | 98  | 97  | 0.37 | 0.35 | 0.26 | 0.26  | 0.93  | 0.14 | 0.43  | - |
|           | rs3737794  | C/G   | 5'UTR    | N | -   | -   | -    | -    | -    | -     | -     | -    | -     | - |
| NES       | rs2886443  | A/G   | CDS      | Y | 91  | 91  | 0.22 | 0.21 | 0.14 | -     | -     | -    | -     | - |
|           | rs3748570  | A/G   | CDS      | N | -   | -   | -    | -    | -    | -     | -     | -    | -     | - |
| NLK       | rs34690763 | C/T   | Promoter | Y | 100 | 100 | 0.00 | 0.00 | -    | -     | -     | -    | -     | - |
| NOTCH1    | rs11574885 | T/C   | CDS      | N | -   | -   | -    | -    | -    | -     | -     | -    | -     | - |
| NOTCH2    | rs864447   | G/C   | 5'UTR    | N | -   | -   | -    | -    | -    | -     | -     | -    | -     | - |
| NOTCH3    | rs1044009  | G/A   | CDS      | N | -   | -   | -    | -    | -    | -     | -     | -    | -     | - |
|           | rs35769976 | C/G   | CDS      | N | -   | -   | -    | -    | -    | -     | -     | -    | -     | - |
| NUMB      | rs11625196 | C/G   | 3'UTR    | Y | 100 | 100 | 0.30 | 0.32 | 0.58 | 0.18  | 0.06  | 0.88 | 0.13  | - |

|        |            |     |          |   |     |     |      |      |      |      |      |      |      |   |
|--------|------------|-----|----------|---|-----|-----|------|------|------|------|------|------|------|---|
| NUMBL  | rs2241596  | C/T | 3'UTR    | N | -   | -   | -    | -    | -    | -    | -    | -    | -    | - |
| OC90   | rs7386782  | C/T | CDS      | N | -   | -   | -    | -    | -    | -    | -    | -    | -    | - |
|        | rs7386783  | C/T | CDS      | N | -   | -   | -    | -    | -    | -    | -    | -    | -    | - |
| OPRS1  | rs1800866  | T/G | CDS      | N | -   | -   | -    | -    | -    | -    | -    | -    | -    | - |
| PARD6B | rs231583   | G/A | Promoter | N | -   | -   | -    | -    | -    | -    | -    | -    | -    | - |
|        | rs6020721  | G/T | 3'UTR    | Y | 99  | 99  | 0.36 | 0.32 | 0.68 | 0.14 | 0.07 | 0.32 | 0.07 |   |
| PDGFRA | rs1800812  | G/T | Promoter | Y | 100 | 100 | 0.15 | 0.15 | 0.31 | 0.01 | 0.60 | 0.01 | 0.63 |   |
|        | rs2303429  | C/T | IVS      | Y | 100 | 100 | 0.10 | 0.09 | 0.72 | 0.71 | 0.45 | 0.62 | 0.41 |   |
|        | rs35597368 | C/T | CDS      | Y | 97  | 99  | 0.14 | 0.13 | 0.59 | 0.08 | 0.03 | 0.86 | 0.40 |   |
|        | rs6554162  | G/A | Promoter | Y | 97  | 97  | 0.25 | 0.26 | 0.30 | 0.01 | 0.17 | 0.03 | 0.86 |   |
| PIWIL2 | rs4871990  | C/T | Promoter | Y | 99  | 98  | 0.16 | 0.16 | 0.90 | 0.67 | 0.34 | 0.84 | 0.90 |   |
| PPARD  | rs2016520  | G/A | IVS      | N | -   | -   | -    | -    | -    | -    | -    | -    | -    |   |
| PRKCI  | rs1082976  | G/A | Promoter | N | -   | -   | -    | -    | -    | -    | -    | -    | -    |   |
| PROM1  | rs4698134  | A/G | Promoter | Y | 100 | 100 | 0.21 | 0.22 | 0.31 | 0.60 | 0.46 | 0.63 | 0.65 |   |
| PROX1  | rs340872   | A/T | Promoter | N | -   | -   | -    | -    | -    | -    | -    | -    | -    |   |
|        | rs340873   | G/A | Promoter | N | -   | -   | -    | -    | -    | -    | -    | -    | -    |   |
| PSEN2  | rs1295645  | C/T | 5'UTR    | Y | 100 | 99  | 0.26 | 0.22 | 0.22 | 0.15 | 0.06 | 0.40 | 0.06 |   |
|        | rs3177404  | C/T | 5'UTR    | Y | 100 | 100 | 0.06 | 0.05 | 0.87 | 0.99 | 0.87 | 0.96 | 0.86 |   |
| PSENE1 | rs3761087  | G/A | IVS      | N | -   | -   | -    | -    | -    | -    | -    | -    | -    |   |
|        | rs2293687  | C/A | IVS      | N | -   | -   | -    | -    | -    | -    | -    | -    | -    |   |
| PTCRA  | rs36111725 | A/G | CDS      | N | -   | -   | -    | -    | -    | -    | -    | -    | -    |   |
|        | rs9471958  | C/T | Promoter | Y | 98  | 96  | 0.03 | 0.03 | 0.43 | -    | -    | -    | -    |   |
| PTPRC  | rs2274366  | C/T | 5'UTR    | Y | 99  | 99  | 0.16 | 0.16 | 0.72 | 0.95 | 0.66 | 0.91 | 0.73 |   |
|        | rs3754094  | C/T | Promoter | Y | 96  | 97  | 0.17 | 0.15 | 0.18 | 0.33 | 0.21 | 0.31 | 0.21 |   |
|        | rs4915154  | A/G | CDS      | Y | 100 | 100 | 0.21 | 0.22 | 0.47 | 0.84 | 0.60 | 0.63 | 0.54 |   |
| RAC1   | rs6967221  | A/G | IVS      | Y | 97  | 98  | 0.08 | 0.08 | 0.22 | 0.59 | 0.32 | 0.95 | 0.86 |   |
|        | rs35530051 | G/T | IVS      | Y | 99  | 99  | 0.02 | 0.02 | 0.26 | -    | -    | -    | -    |   |
|        | rs3729793  | C/G | IVS      | Y | 99  | 97  | 0.02 | 0.02 | 0.23 | -    | -    | -    | -    |   |
|        | rs6950333  | A/G | IVS      | Y | 100 | 99  | 0.07 | 0.07 | 0.12 | 0.60 | 0.84 | 0.31 | 0.68 |   |
|        | rs2303366  | A/C | 3'UTR    | N | -   | -   | -    | -    | -    | -    | -    | -    | -    |   |
|        | rs34932801 | G/C | Promoter | N | -   | -   | -    | -    | -    | -    | -    | -    | -    |   |
| RHOA   | rs836479   | C/A | IVS      | N | -   | -   | -    | -    | -    | -    | -    | -    | -    |   |
|        | rs836480   | A/C | IVS      | N | -   | -   | -    | -    | -    | -    | -    | -    | -    |   |
|        | rs6779524  | C/T | Promoter | Y | 87  | 83  | 0.09 | 0.08 | 0.29 | -    | -    | -    | -    |   |
|        | rs6784820  | A/G | Promoter | Y | 83  | 83  | 0.00 | 0.00 | -    | -    | -    | -    | -    |   |
| RHOB   | None       | -   | -        | - | -   | -   | -    | -    | -    | -    | -    | -    |      |   |
| RHOC   | rs11102522 | C/T | Promoter | N | -   | -   | -    | -    | -    | -    | -    | -    | -    |   |
| S100B  | rs2839364  | C/T | Promoter | Y | 98  | 99  | 0.12 | 0.10 | 0.39 | 0.13 | 0.09 | 0.31 | 0.07 |   |
|        | rs2186358  | A/C | IVS      | Y | 100 | 100 | 0.14 | 0.10 | 0.48 | 0.02 | 0.02 | 0.24 | 0.01 |   |
|        | rs2839365  | C/G | Promoter | Y | 100 | 100 | 0.29 | 0.26 | 0.43 | 0.29 | 0.21 | 0.21 | 0.13 |   |
|        | rs9722     | C/T | 3'UTR    | Y | 100 | 100 | 0.34 | 0.37 | 0.23 | 0.26 | 0.09 | 0.46 | 0.11 |   |
| SHH    | rs872723   | C/T | Promoter | Y | 100 | 100 | 0.06 | 0.07 | 0.67 | 0.36 | 0.72 | 0.98 | 0.60 |   |

|                  |        |            |     |          |   |     |     |      |      |      |      |      |      |      |
|------------------|--------|------------|-----|----------|---|-----|-----|------|------|------|------|------|------|------|
|                  |        | rs1882041  | G/A | Promoter | N | -   | -   | -    | -    | -    | -    | -    | -    | -    |
|                  |        | rs9333594  | G/A | 5'UTR    | N | -   | -   | -    | -    | -    | -    | -    | -    | -    |
|                  | SLC2A1 | None       | -   | -        | - | -   | -   | -    | -    | -    | -    | -    | -    | -    |
|                  |        | rs11537640 | T/G | 5'UTR    | N | -   | -   | -    | -    | -    | -    | -    | -    | -    |
|                  | SNAI1  | rs4647958  | C/T | CDS      | Y | 99  | 99  | 0.11 | 0.11 | 0.19 | 0.68 | 0.52 | 0.63 | 0.79 |
|                  |        | rs4647954  | C/T | 5'UTR    | N | -   | -   | -    | -    | -    | -    | -    | -    | -    |
|                  |        | rs4647955  | C/G | 5'UTR    | N | -   | -   | -    | -    | -    | -    | -    | -    | -    |
|                  | SNW1   | rs11622449 | G/T | Promoter | Y | 100 | 100 | 0.07 | 0.07 | 0.26 | 0.99 | 0.99 | 0.88 | 0.88 |
|                  | STAU1  | rs348291   | C/G | Promoter | N | -   | -   | -    | -    | -    | -    | -    | -    | -    |
|                  |        | rs348290   | C/T | Promoter | N | -   | -   | -    | -    | -    | -    | -    | -    | -    |
|                  | STAU2  | rs949493   | C/T | CDS      | Y | 100 | 100 | 0.03 | 0.03 | 0.70 | -    | -    | -    | -    |
|                  | T      | rs2305089  | C/T | CDS      | Y | 96  | 97  | 0.33 | 0.33 | 0.21 | 1.00 | 0.87 | 0.86 | 0.83 |
|                  |        | rs3099266  | T/C | 5'UTR    | N | -   | -   | -    | -    | -    | -    | -    | -    | -    |
|                  |        | rs3816300  | T/C | CDS      | N | -   | -   | -    | -    | -    | -    | -    | -    | -    |
|                  | THY1   | rs1054735  | C/G | 3'UTR    | N | -   | -   | -    | -    | -    | -    | -    | -    | -    |
|                  |        | rs11574653 | G/A | Promoter | N | -   | -   | -    | -    | -    | -    | -    | -    | -    |
|                  | TLE1   | rs3814535  | A/C | Promoter | N | -   | -   | -    | -    | -    | -    | -    | -    | -    |
|                  | TUBB3  | rs1135425  | C/T | 3'UTR    | N | -   | -   | -    | -    | -    | -    | -    | -    | -    |
|                  | UTF1   | rs11599284 | A/G | CDS      | N | -   | -   | -    | -    | -    | -    | -    | -    | -    |
|                  | WIF1   | None       | -   | -        | - | -   | -   | -    | -    | -    | -    | -    | -    | -    |
| Tumor Metastasis | BRMS1  | rs1052566  | G/A | 3'UTR    | N | -   | -   | -    | -    | -    | -    | -    | -    | -    |
| (n=42)           | CDH19  | rs3813075  | G/T | Promoter | Y | 99  | 100 | 0.33 | 0.35 | 0.51 | 0.69 | 0.65 | 0.44 | 0.43 |
|                  |        | rs3813076  | A/C | Promoter | Y | 99  | 99  | 0.34 | 0.35 | 0.43 | 0.77 | 0.56 | 0.70 | 0.53 |
|                  |        | rs487514   | A/T | Promoter | Y | 0   | 0   | -    | -    | -    | -    | -    | -    | -    |
|                  |        | rs1539831  | C/T | Promoter | N | -   | -   | -    | -    | -    | -    | -    | -    | -    |
|                  | CHD4   | rs2267968  | G/A | 3'UTR    | N | -   | -   | -    | -    | -    | -    | -    | -    | -    |
|                  |        | rs1734116  | A/G | 5'UTR    | N | -   | -   | -    | -    | -    | -    | -    | -    | -    |
|                  |        | rs35512811 | G/A | CDS      | N | -   | -   | -    | -    | -    | -    | -    | -    | -    |
|                  |        | rs1639122  | A/C | CDS      | N | -   | -   | -    | -    | -    | -    | -    | -    | -    |
|                  | COL4A2 | rs3803230  | C/G | CDS      | Y | 100 | 100 | 0.10 | 0.10 | 0.89 | 0.96 | 0.91 | 0.75 | 0.85 |
|                  |        | rs7990383  | A/G | CDS      | Y | 99  | 98  | 0.19 | 0.21 | 0.39 | 0.33 | 0.16 | 0.30 | 0.18 |
|                  | CST7   | rs227653   | A/G | CDS      | Y | 100 | 100 | 0.08 | 0.09 | 0.75 | 0.64 | 0.98 | 0.32 | 0.36 |
|                  | CTSL1  | rs3118869  | C/A | Promoter | N | -   | -   | -    | -    | -    | -    | -    | -    | -    |
|                  | DCC    | rs2229080  | C/G | CDS      | Y | 99  | 99  | 0.40 | 0.43 | 0.25 | 0.40 | 0.18 | 0.39 | 0.19 |
|                  |        | rs2278339  | A/C | CDS      | Y | 100 | 100 | 0.03 | 0.04 | 0.99 | -    | -    | -    | -    |
|                  |        | rs17753970 | G/A | Promoter | N | -   | -   | -    | -    | -    | -    | -    | -    | -    |
|                  | EPHB2  | None       | -   | -        | - | -   | -   | -    | -    | -    | -    | -    | -    | -    |
|                  | ETV4   | rs3765174  | C/T | Promoter | N | -   | -   | -    | -    | -    | -    | -    | -    | -    |
|                  | ETV6   | None       | -   | -        | - | -   | -   | -    | -    | -    | -    | -    | -    | -    |
|                  | FAT    | rs28647489 | A/G | CDS      | Y | 100 | 100 | 0.34 | 0.34 | 0.13 | 0.53 | 0.76 | 0.30 | 0.78 |
|                  |        | rs328418   | A/G | CDS      | Y | 93  | 95  | 0.28 | 0.28 | 0.78 | -    | -    | -    | -    |
|                  |        | rs3733413  | C/T | CDS      | Y | 98  | 99  | 0.12 | 0.11 | 0.97 | 0.18 | 0.07 | 0.56 | 0.12 |





|         |            |     |          |   |     |     |      |      |      |        |      |        |      |
|---------|------------|-----|----------|---|-----|-----|------|------|------|--------|------|--------|------|
| MMP13   | rs3819089  | A/G | IVS      | Y | 100 | 99  | 0.26 | 0.28 | 0.53 | 0.32   | 0.85 | 0.11   | 0.18 |
|         | rs597315   | T/A | Promoter | N | -   | -   | -    | -    | -    | -      | -    | -      | -    |
|         | rs2252070  | A/G | Promoter | N | -   | -   | -    | -    | -    | -      | -    | -      | -    |
|         | rs562736   | T/A | Promoter | N | -   | -   | -    | -    | -    | -      | -    | -      | -    |
| MYCL1   | rs7548524  | C/T | Promoter | N | -   | -   | -    | -    | -    | -      | -    | -      | -    |
| NF2     | rs1800538  | C/G | Promoter | Y | 98  | 97  | 0.19 | 0.21 | 0.78 | 0.38   | 0.55 | 0.20   | 0.20 |
|         | rs1800539  | C/A | 5'UTR    | N | -   | -   | -    | -    | -    | -      | -    | -      | -    |
|         | rs3181682  | G/C | 5'UTR    | N | -   | -   | -    | -    | -    | -      | -    | -      | -    |
| NME2    | rs1062386  | A/T | IVS      | N | -   | -   | -    | -    | -    | -      | -    | -      | -    |
| NR4A3   | rs1526267  | C/A | IVS      | N | -   | -   | -    | -    | -    | -      | -    | -      | -    |
| PTHLH   | rs27633    | C/A | Promoter | N | -   | -   | -    | -    | -    | -      | -    | -      | -    |
|         | rs6246     | G/A | 5'UTR    | N | -   | -   | -    | -    | -    | -      | -    | -      | -    |
|         | rs26303    | G/C | Promoter | N | -   | -   | -    | -    | -    | -      | -    | -      | -    |
| PTP4A3  | rs7388002  | C/G | Promoter | N | -   | -   | -    | -    | -    | -      | -    | -      | -    |
| RECK    | rs16932912 | G/A | CDS      | Y | 100 | 100 | 0.26 | 0.30 | 0.19 | 0.0003 | 0.33 | 0.0003 | 0.02 |
|         | rs7857647  | A/T | Promoter | N | -   | -   | -    | -    | -    | -      | -    | -      | -    |
| RORB    | None       | -   | -        | - | -   | -   | -    | -    | -    | -      | -    | -      | -    |
| RPSA    | rs1472508  | A/G | Promoter | Y | 98  | 100 | 0.32 | 0.30 | 0.00 | -      | -    | -      | -    |
|         | rs7623381  | A/G | Promoter | Y | 100 | 100 | 0.26 | 0.24 | 0.06 | 0.06   | 0.68 | 0.04   | 0.63 |
|         | rs3772146  | T/C | 5'UTR    | N | -   | -   | -    | -    | -    | -      | -    | -      | -    |
| SMAD2   | rs4940109  | A/G | Promoter | Y | 96  | 95  | 0.18 | 0.15 | 0.87 | 0.18   | 0.08 | 0.41   | 0.08 |
| SSTR2   | rs2881097  | G/C | Promoter | N | -   | -   | -    | -    | -    | -      | -    | -      | -    |
|         | rs34901075 | C/T | Promoter | N | -   | -   | -    | -    | -    | -      | -    | -      | -    |
|         | rs1466113  | G/C | IVS      | N | -   | -   | -    | -    | -    | -      | -    | -      | -    |
|         | rs998571   | G/A | IVS      | N | -   | -   | -    | -    | -    | -      | -    | -      | -    |
| TCF20   | rs34030679 | C/T | CDS      | Y | 100 | 100 | 0.02 | 0.02 | 0.61 | -      | -    | -      | -    |
|         | rs5758651  | C/T | CDS      | Y | 99  | 99  | 0.28 | 0.27 | 0.34 | 0.78   | 0.46 | 0.93   | 0.81 |
|         | rs5758652  | C/T | Promoter | Y | 100 | 100 | 0.28 | 0.27 | 0.42 | 0.70   | 0.39 | 0.89   | 0.81 |
| TIAM1   | rs9977815  | A/G | 5'UTR    | Y | 98  | 99  | 0.33 | 0.33 | 0.57 | 0.98   | 0.77 | 0.94   | 0.86 |
|         | rs2070417  | A/C | CDS      | N | -   | -   | -    | -    | -    | -      | -    | -      | -    |
|         | rs2070418  | C/T | CDS      | N | -   | -   | -    | -    | -    | -      | -    | -      | -    |
| TIAM2   | rs1571767  | A/T | CDS      | Y | 100 | 100 | 0.08 | 0.09 | 0.45 | 0.54   | 0.45 | 0.44   | 0.57 |
|         | rs931312   | C/T | CDS      | Y | 100 | 100 | 0.32 | 0.33 | 0.42 | 0.13   | 0.85 | 0.09   | 0.52 |
|         | rs9384283  | A/C | Promoter | Y | 100 | 100 | 0.29 | 0.27 | 0.43 | 0.50   | 0.32 | 0.32   | 0.23 |
| TIMP4   | rs17035957 | C/T | Promoter | Y | 100 | 99  | 0.14 | 0.15 | 0.24 | 0.56   | 0.39 | 0.44   | 0.36 |
|         | rs3755724  | C/T | Promoter | Y | 88  | 93  | 0.44 | 0.42 | 0.95 | -      | -    | -      | -    |
| TMPRSS4 | rs12270001 | A/G | CDS      | N | -   | -   | -    | -    | -    | -      | -    | -      | -    |
|         | rs17525348 | C/T | Promoter | Y | 100 | 100 | 0.11 | 0.11 | 0.91 | 0.91   | 0.68 | 0.90   | 0.73 |
|         | rs1786189  | C/T | Promoter | N | -   | -   | -    | -    | -    | -      | -    | -      | -    |
| TPBG    | rs770911   | G/A | 5'UTR    | N | -   | -   | -    | -    | -    | -      | -    | -      | -    |
|         | rs4590314  | G/A | Promoter | N | -   | -   | -    | -    | -    | -      | -    | -      | -    |
| TRPM1   | rs11070811 | C/T | Promoter | Y | 98  | 95  | 0.11 | 0.11 | 0.84 | -      | -    | -      | -    |



|          |            |     |          |   |     |     |      |      |      |      |      |      |      |
|----------|------------|-----|----------|---|-----|-----|------|------|------|------|------|------|------|
| ABHD10   | rs703271   | C/G | Promoter | Y | 100 | 100 | 0.29 | 0.28 | 0.89 | 0.30 | 0.21 | 0.85 | 0.35 |
|          | rs9833906  | C/T | Promoter | Y | 100 | 100 | 0.10 | 0.11 | 0.60 | 0.42 | 0.42 | 0.43 | 0.60 |
| ABHD11   | None       | -   | -        | - | -   | -   | -    | -    | -    | -    | -    | -    | -    |
| ABHD2    | rs293370   | A/G | Promoter | N | -   | -   | -    | -    | -    | -    | -    | -    | -    |
| ABHD6    | rs7640259  | C/T | Promoter | Y | 100 | 100 | 0.28 | 0.29 | 0.87 | 0.90 | 0.79 | 0.75 | 0.73 |
| ABHD7    | rs6696267  | A/C | Promoter | N | -   | -   | -    | -    | -    | -    | -    | -    | -    |
| ACAA1    | rs156265   | C/G | CDS      | Y | 99  | 100 | 0.31 | 0.30 | 0.13 | 0.29 | 0.20 | 0.60 | 0.45 |
| ACAA2    | rs11549285 | A/G | CDS      | Y | 100 | 100 | 0.15 | 0.15 | 0.76 | 0.78 | 0.96 | 0.51 | 0.88 |
|          | rs9967237  | T/A | Promoter | N | -   | -   | -    | -    | -    | -    | -    | -    | -    |
| ACOT7    | rs7512532  | C/G | Promoter | Y | 96  | 95  | 0.21 | 0.20 | 0.80 | 0.52 | 0.42 | 0.60 | 0.85 |
| ACOT9    | rs12690087 | C/T | Promoter | Y | 100 | 100 | 0.25 | 0.21 | 0.00 | -    | -    | -    | -    |
|          | rs3764881  | C/A | Promoter | N | -   | -   | -    | -    | -    | -    | -    | -    | -    |
| ACOX1    | rs3744032  | C/T | CDS      | Y | 100 | 100 | 0.11 | 0.14 | 0.77 | 0.09 | 0.07 | 0.14 | 0.04 |
|          | rs1135640  | G/C | CDS      | N | -   | -   | -    | -    | -    | -    | -    | -    | -    |
|          | rs1137582  | C/G | CDS      | N | -   | -   | -    | -    | -    | -    | -    | -    | -    |
| ACOX2    | None       | -   | -        | - | -   | -   | -    | -    | -    | -    | -    | -    |      |
| ACOXL    | rs1554005  | C/T | CDS      | Y | 100 | 100 | 0.15 | 0.16 | 0.78 | 0.36 | 0.39 | 0.15 | 0.23 |
|          | rs17041850 | C/T | CDS      | Y | 100 | 100 | 0.31 | 0.28 | 0.20 | 0.06 | 0.34 | 0.01 | 0.06 |
|          | rs3761712  | G/A | IVS      | N | -   | -   | -    | -    | -    | -    | -    | -    | -    |
| ADPRH    | rs12494451 | A/G | Promoter | Y | 100 | 100 | 0.21 | 0.22 | 0.57 | 0.85 | 0.81 | 0.80 | 0.90 |
| ADPRHL1  | None       | -   | -        | - | -   | -   | -    | -    | -    | -    | -    | -    |      |
| ADPRHL2  | rs2236387  | C/T | CDS      | Y | 97  | 99  | 0.38 | 0.39 | 0.83 | 0.78 | 0.64 | 0.81 | 0.84 |
| AFAR3    | rs12046875 | G/T | 5'UTR    | Y | 99  | 100 | 0.15 | 0.15 | 0.35 | 0.90 | 0.91 | 0.84 | 0.97 |
| AGMAT    | rs11580170 | C/T | CDS      | Y | 99  | 99  | 0.07 | 0.07 | 0.89 | 0.79 | 0.63 | 0.69 | 0.59 |
|          | rs6429757  | C/G | CDS      | Y | 100 | 100 | 0.41 | 0.43 | 0.83 | 0.62 | 0.96 | 0.45 | 0.63 |
| AGPAT1   | rs17133205 | A/G | IVS      | N | -   | -   | -    | -    | -    | -    | -    | -    | -    |
| AGPAT3   | rs999519   | C/G | IVS      | N | -   | -   | -    | -    | -    | -    | -    | -    | -    |
| AGPAT4   | rs6906489  | C/T | IVS      | Y | 100 | 100 | 0.05 | 0.05 | 0.56 | 0.49 | 0.31 | 0.52 | 0.67 |
| AGPAT5   | rs1834450  | C/T | Promoter | Y | 100 | 100 | 0.05 | 0.05 | 0.60 | 0.98 | 1.00 | 0.83 | 0.83 |
| AGPAT6   | rs3802313  | C/T | IVS      | Y | 100 | 100 | 0.09 | 0.08 | 0.83 | 0.72 | 0.49 | 0.75 | 0.48 |
|          | rs11996670 | C/T | IVS      | Y | 100 | 100 | 0.46 | 0.44 | 0.78 | 0.15 | 0.06 | 0.91 | 0.23 |
|          | rs999188   | T/G | 5'UTR    | N | -   | -   | -    | -    | -    | -    | -    | -    | -    |
| AKR1CL1  | rs1781931  | A/G | 3'UTR    | Y | 98  | 99  | 0.23 | 0.22 | 0.39 | 0.29 | 0.26 | 0.46 | 0.51 |
|          | rs1781935  | C/G | 3'UTR    | Y | 98  | 93  | 0.11 | 0.11 | 0.56 | -    | -    | -    | -    |
| AKR1CL2  | None       | -   | -        | - | -   | -   | -    | -    | -    | -    | -    | -    |      |
| AKR1D1   | rs1872929  | A/C | IVS      | Y | 100 | 100 | 0.26 | 0.24 | 0.51 | 0.38 | 0.83 | 0.18 | 0.24 |
|          | rs1872930  | C/T | 3'UTR    | Y | 100 | 100 | 0.26 | 0.24 | 0.53 | 0.40 | 0.83 | 0.19 | 0.26 |
|          | rs3807332  | G/A | Promoter | N | -   | -   | -    | -    | -    | -    | -    | -    | -    |
| AKR7A3   | rs1738025  | T/C | CDS      | N | -   | -   | -    | -    | -    | -    | -    | -    | -    |
|          | rs1738023  | T/C | CDS      | N | -   | -   | -    | -    | -    | -    | -    | -    | -    |
| ALDH16A1 | rs1055637  | A/G | 3'UTR    | Y | 99  | 99  | 0.25 | 0.27 | 0.64 | 0.58 | 0.28 | 0.48 | 0.25 |
|          | rs2293011  | A/C | Promoter | Y | 100 | 100 | 0.35 | 0.37 | 0.79 | 0.60 | 0.43 | 0.31 | 0.26 |

|         |            |     |          |   |     |     |      |      |      |      |      |      |      |
|---------|------------|-----|----------|---|-----|-----|------|------|------|------|------|------|------|
| ALDH1L1 | rs4646740  | C/G | IVS      | Y | 100 | 100 | 0.19 | 0.18 | 0.29 | 0.66 | 0.85 | 0.32 | 0.36 |
|         | rs9825571  | G/A | 5'UTR    | N | -   | -   | -    | -    | -    | -    | -    | -    | -    |
|         | rs2276724  | A/G | CDS      | N | -   | -   | -    | -    | -    | -    | -    | -    | -    |
| ALOX5AP | rs3809376  | A/C | Promoter | Y | 99  | 100 | 0.13 | 0.13 | 0.06 | 0.80 | 0.89 | 0.52 | 0.61 |
| ALOXE3  | None       | -   | -        | - | -   | -   | -    | -    | -    | -    | -    | -    | -    |
| AMDHD1  | rs10745740 | G/T | Promoter | Y | 98  | 98  | 0.09 | 0.09 | 0.27 | 0.99 | 0.76 | 0.78 | 0.74 |
|         | rs10859990 | C/T | Promoter | N | -   | -   | -    | -    | -    | -    | -    | -    | -    |
|         | rs10859991 | C/G | Promoter | N | -   | -   | -    | -    | -    | -    | -    | -    | -    |
| AMT     | None       | -   | -        | - | -   | -   | -    | -    | -    | -    | -    | -    |      |
| AOAH    | rs3735384  | A/G | CDS      | Y | 83  | 81  | 0.06 | 0.06 | 0.14 | -    | -    | -    | -    |
|         | rs3735386  | C/G | CDS      | Y | 100 | 100 | 0.05 | 0.06 | 0.04 | -    | -    | -    | -    |
|         | rs7796305  | T/A | Promoter | N | -   | -   | -    | -    | -    | -    | -    | -    | -    |
|         | rs11976480 | C/T | CDS      | N | -   | -   | -    | -    | -    | -    | -    | -    | -    |
|         | rs3807607  | G/A | Promoter | N | -   | -   | -    | -    | -    | -    | -    | -    | -    |
|         | rs3807608  | G/A | Promoter | N | -   | -   | -    | -    | -    | -    | -    | -    | -    |
| AOX1    | rs3731722  | C/T | CDS      | Y | 100 | 100 | 0.08 | 0.08 | 0.37 | 0.52 | 0.28 | 0.67 | 0.53 |
|         | rs868810   | G/A | IVS      | N | -   | -   | -    | -    | -    | -    | -    | -    | -    |
| ARD1A   | rs2071128  | A/G | 3'UTR    | Y | 97  | 98  | 0.38 | 0.40 | 0.00 | -    | -    | -    | -    |
| AS3MT   | rs12416687 | C/T | Promoter | Y | 100 | 100 | 0.09 | 0.09 | 0.57 | 0.80 | 0.54 | 0.76 | 0.88 |
|         | rs7098825  | C/T | Promoter | Y | 100 | 100 | 0.29 | 0.28 | 0.80 | 0.96 | 0.96 | 0.89 | 0.90 |
| ASAH2   | rs1898198  | A/G | Promoter | N | -   | -   | -    | -    | -    | -    | -    | -    | -    |
|         | rs10825492 | G/A | Promoter | N | -   | -   | -    | -    | -    | -    | -    | -    | -    |
|         | rs2196463  | G/A | Promoter | N | -   | -   | -    | -    | -    | -    | -    | -    | -    |
| AS AHL  | rs4859571  | C/T | CDS      | Y | 100 | 100 | 0.33 | 0.36 | 0.81 | 0.42 | 0.21 | 0.42 | 0.19 |
|         | rs6823734  | G/A | IVS      | N | -   | -   | -    | -    | -    | -    | -    | -    | -    |
| ASAH3L  | rs10964136 | C/T | CDS      | Y | 100 | 100 | 0.14 | 0.16 | 0.91 | 0.30 | 0.17 | 0.89 | 0.25 |
|         | rs9298800  | C/T | Promoter | Y | 100 | 99  | 0.18 | 0.18 | 0.61 | 0.96 | 0.76 | 0.78 | 0.74 |
| ASPHD1  | rs7498372  | G/A | Promoter | N | -   | -   | -    | -    | -    | -    | -    | -    | -    |
| ASPHD2  | None       | -   | -        | - | -   | -   | -    | -    | -    | -    | -    | -    | -    |
| AYTL1   | rs9922534  | C/T | Promoter | Y | 99  | 99  | 0.38 | 0.36 | 0.55 | 0.31 | 0.15 | 0.72 | 0.22 |
|         | rs837550   | G/A | CDS      | N | -   | -   | -    | -    | -    | -    | -    | -    | -    |
|         | rs17302903 | G/C | 5'UTR    | N | -   | -   | -    | -    | -    | -    | -    | -    | -    |
| AYTL2   | None       | -   | -        | - | -   | -   | -    | -    | -    | -    | -    | -    |      |
| BBOX1   | rs11029795 | A/G | Promoter | Y | 100 | 100 | 0.08 | 0.07 | 0.24 | 0.65 | 0.53 | 0.52 | 0.47 |
|         | rs979894   | G/A | 5'UTR    | N | -   | -   | -    | -    | -    | -    | -    | -    | -    |
| BCDO2   | rs10431036 | A/G | Promoter | Y | 100 | 100 | 0.38 | 0.38 | 0.93 | 1.00 | 0.96 | 0.98 | 0.97 |
|         | rs7123686  | A/C | IVS      | N | -   | -   | -    | -    | -    | -    | -    | -    | -    |
| BCMO1   | rs11646692 | C/G | Promoter | Y | 100 | 100 | 0.34 | 0.34 | 0.65 | 0.38 | 0.46 | 0.40 | 0.89 |
|         | rs12934922 | A/T | CDS      | Y | 99  | 100 | 0.10 | 0.14 | 0.67 | 0.04 | 0.02 | 0.18 | 0.02 |
|         | rs7501331  | C/T | CDS      | Y | 100 | 100 | 0.11 | 0.12 | 0.33 | 0.92 | 0.60 | 0.84 | 0.60 |
| BDH2    | rs1054707  | A/G | CDS      | Y | 100 | 100 | 0.09 | 0.10 | 0.40 | 0.14 | 0.18 | 0.16 | 0.39 |
|         | rs11734396 | A/G | Promoter | Y | 98  | 99  | 0.19 | 0.19 | 0.53 | 0.94 | 0.91 | 0.62 | 0.65 |





|         |            |     |          |   |     |     |      |      |      |      |      |      |      |
|---------|------------|-----|----------|---|-----|-----|------|------|------|------|------|------|------|
|         | rs2302311  | A/T | CDS      | Y | 100 | 100 | 0.04 | 0.03 | 0.12 | -    | -    | -    | -    |
|         | rs11079339 | A/G | CDS      | N | -   | -   | -    | -    | -    | -    | -    | -    | -    |
|         | rs12602891 | C/T | 5'UTR    | N | -   | -   | -    | -    | -    | -    | -    | -    | -    |
| FA2H    | None       | -   | -        | - | -   | -   | -    | -    | -    | -    | -    | -    | -    |
| FAAH    | rs324420   | A/C | CDS      | N | -   | -   | -    | -    | -    | -    | -    | -    | -    |
|         | rs913168   | G/A | Promoter | N | -   | -   | -    | -    | -    | -    | -    | -    | -    |
| FAH     | rs16971784 | A/G | IVS      | Y | 100 | 100 | 0.18 | 0.20 | 0.89 | 0.22 | 0.16 | 0.19 | 0.11 |
|         | rs3752693  | C/T | IVS      | Y | 97  | 100 | 0.18 | 0.16 | 0.88 | 0.41 | 0.20 | 0.90 | 0.25 |
|         | rs1370275  | C/T | IVS      | Y | 100 | 100 | 0.27 | 0.24 | 0.88 | 0.30 | 0.78 | 0.17 | 0.22 |
|         | rs1370277  | A/T | IVS      | Y | 100 | 100 | 0.34 | 0.36 | 0.32 | 0.34 | 0.13 | 0.62 | 0.27 |
|         | rs7180031  | A/G | IVS      | Y | 100 | 100 | 0.33 | 0.32 | 0.05 | 0.93 | 0.84 | 0.81 | 0.79 |
|         | rs12591114 | C/T | IVS      | Y | 100 | 100 | 0.41 | 0.44 | 0.35 | 0.17 | 0.42 | 0.11 | 0.15 |
|         | rs1049194  | C/T | 3'UTR    | Y | 100 | 100 | 0.14 | 0.12 | 0.25 | 0.26 | 0.75 | 0.13 | 0.21 |
|         | rs7164048  | A/C | IVS      | Y | 100 | 100 | 0.02 | 0.03 | 0.74 | -    | -    | -    | -    |
|         | rs12593746 | C/T | IVS      | N | -   | -   | -    | -    | -    | -    | -    | -    | -    |
| FAHD1   | rs3743853  | G/A | CDS      | N | -   | -   | -    | -    | -    | -    | -    | -    | -    |
| FAHD2B  | rs1257084  | A/G | IVS      | Y | 100 | 100 | 0.28 | 0.27 | 0.54 | 0.83 | 0.95 | 0.68 | 0.77 |
| FMOD    | rs10920615 | A/G | IVS      | Y | 100 | 100 | 0.27 | 0.30 | 0.67 | 0.33 | 0.26 | 0.13 | 0.09 |
|         | rs4971252  | C/G | Promoter | N | -   | -   | -    | -    | -    | -    | -    | -    | -    |
| FOXRED1 | rs7130615  | A/G | Promoter | Y | 98  | 94  | 0.13 | 0.15 | 0.84 | -    | -    | -    | -    |
| FOXRED2 | rs2277841  | C/T | CDS      | N | -   | -   | -    | -    | -    | -    | -    | -    | -    |
| GCH1    | rs841      | C/T | IVS      | Y | 99  | 100 | 0.39 | 0.38 | 0.53 | 0.86 | 0.90 | 0.58 | 0.71 |
| GFPT2   | rs2303007  | C/T | CDS      | N | -   | -   | -    | -    | -    | -    | -    | -    | -    |
| GLYAT   | rs10896818 | A/T | CDS      | Y | 94  | 94  | 0.24 | 0.22 | 0.44 | -    | -    | -    | -    |
|         | rs675815   | C/T | CDS      | Y | 100 | 100 | 0.21 | 0.20 | 0.96 | 0.69 | 0.32 | 0.90 | 0.42 |
|         | rs675423   | A/G | 3'UTR    | N | -   | -   | -    | -    | -    | -    | -    | -    | -    |
| GLYATL1 | rs7120597  | A/C | Promoter | Y | 100 | 100 | 0.35 | 0.33 | 0.49 | 0.47 | 0.21 | 0.79 | 0.29 |
| GLYATL2 | rs10896855 | C/A | Promoter | N | -   | -   | -    | -    | -    | -    | -    | -    | -    |
|         | rs11229651 | C/T | CDS      | N | -   | -   | -    | -    | -    | -    | -    | -    | -    |
|         | rs11229660 | C/A | Promoter | N | -   | -   | -    | -    | -    | -    | -    | -    | -    |
|         | rs4939229  | A/G | Promoter | N | -   | -   | -    | -    | -    | -    | -    | -    | -    |
| GMPR    | rs1042391  | A/T | CDS      | Y | 99  | 99  | 0.12 | 0.11 | 0.62 | 0.75 | 0.42 | 0.58 | 0.38 |
| GMPR2   | rs3814815  | T/G | IVS      | N | -   | -   | -    | -    | -    | -    | -    | -    | -    |
| GNPAT   | rs11558492 | C/T | CDS      | Y | 96  | 98  | 0.11 | 0.11 | 0.01 | -    | -    | -    | -    |
|         | rs2274067  | C/G | CDS      | N | -   | -   | -    | -    | -    | -    | -    | -    | -    |
|         | rs518686   | A/G | 5'UTR    | Y | 100 | 98  | 0.45 | 0.42 | 0.53 | 0.23 | 0.60 | 0.09 | 0.20 |
| GPAM    | rs11195836 | A/G | Promoter | Y | 100 | 100 | 0.21 | 0.19 | 0.12 | 0.23 | 0.33 | 0.11 | 0.17 |
|         | rs2001808  | C/T | Promoter | Y | 100 | 100 | 0.08 | 0.11 | 0.95 | 0.09 | 0.02 | 0.97 | 0.03 |
|         | rs2297991  | C/T | 3'UTR    | Y | 100 | 99  | 0.32 | 0.32 | 0.60 | 0.73 | 1.00 | 0.39 | 0.69 |
| GPT     | rs1063739  | A/C | CDS      | N | -   | -   | -    | -    | -    | -    | -    | -    | -    |
| GPX5    | rs769189   | C/T | IVS      | N | -   | -   | -    | -    | -    | -    | -    | -    | -    |
| GPX6    | rs11757000 | C/T | Promoter | Y | 100 | 100 | 0.03 | 0.05 | 0.73 | -    | -    | -    | -    |

|          |            |     |          |   |     |     |      |      |      |      |      |      |      |
|----------|------------|-----|----------|---|-----|-----|------|------|------|------|------|------|------|
|          | rs406113   | A/C | CDS      | Y | 100 | 99  | 0.49 | 0.49 | 0.80 | 0.91 | 0.72 | 0.64 | 0.61 |
| GRHPR    | rs7857159  | A/G | Promoter | Y | 98  | 98  | 0.15 | 0.16 | 0.66 | 0.25 | 0.08 | 0.97 | 0.64 |
| GSR      | rs1002149  | G/T | Promoter | Y | 100 | 100 | 0.16 | 0.17 | 0.71 | 0.71 | 0.63 | 0.62 | 0.80 |
|          | rs8190955  | C/T | CDS      | Y | 100 | 100 | 0.06 | 0.06 | 0.89 | 0.84 | 0.74 | 0.74 | 0.71 |
| HAAO     | rs1065643  | A/G | Promoter | N | -   | -   | -    | -    | -    | -    | -    | -    | -    |
|          | rs2304657  | C/T | Promoter | N | -   | -   | -    | -    | -    | -    | -    | -    | -    |
|          | rs2304661  | G/T | 3'UTR    | N | -   | -   | -    | -    | -    | -    | -    | -    | -    |
|          | rs3816182  | A/T | CDS      | N | -   | -   | -    | -    | -    | -    | -    | -    | -    |
|          | rs3816183  | C/T | CDS      | N | -   | -   | -    | -    | -    | -    | -    | -    | -    |
|          | rs6724265  | G/C | Promoter | N | -   | -   | -    | -    | -    | -    | -    | -    | -    |
| HAGHL    | None       | -   | -        | - | -   | -   | -    | -    | -    | -    | -    | -    | -    |
| HAO1     | rs6140468  | C/T | Promoter | Y | 93  | 91  | 0.45 | 0.44 | 0.26 | -    | -    | -    | -    |
| HAO2     | rs6667679  | A/G | IVS      | Y | 99  | 100 | 0.27 | 0.27 | 0.73 | 0.72 | 0.43 | 0.52 | 0.84 |
|          | rs3753262  | A/T | Promoter | N | -   | -   | -    | -    | -    | -    | -    | -    | -    |
|          | rs3753261  | G/A | Promoter | N | -   | -   | -    | -    | -    | -    | -    | -    | -    |
| HDGF2    | rs8887     | T/C | 3'UTR    | N | -   | -   | -    | -    | -    | -    | -    | -    | -    |
| HDHD1A   | rs1131197  | C/T | IVS      | Y | 100 | 100 | 0.36 | 0.35 | 0.00 | -    | -    | -    | -    |
|          | rs3747386  | C/G | CDS      | Y | 90  | 85  | 0.00 | 0.00 | -    | -    | -    | -    | -    |
| HDHD2    | rs3809966  | C/T | Promoter | N | -   | -   | -    | -    | -    | -    | -    | -    | -    |
|          | rs3809965  | G/A | Promoter | N | -   | -   | -    | -    | -    | -    | -    | -    | -    |
| HDHD3    | rs16933144 | C/G | Promoter | Y | 92  | 88  | 0.31 | 0.30 | 0.16 | -    | -    | -    | -    |
|          | rs3747816  | C/T | 5'UTR    | Y | 98  | 99  | 0.36 | 0.36 | 0.79 | 0.93 | 0.76 | 0.87 | 0.89 |
|          | rs1043836  | C/T | CDS      | N | -   | -   | -    | -    | -    | -    | -    | -    | -    |
| HEMK1    | rs2232248  | G/T | Promoter | N | -   | -   | -    | -    | -    | -    | -    | -    | -    |
|          | rs2227292  | C/T | 5'UTR    | Y | 100 | 100 | 0.31 | 0.32 | 0.70 | 0.54 | 0.27 | 0.86 | 0.37 |
| HEXDC    | rs1141463  | A/C | 5'UTR    | Y | 100 | 100 | 0.33 | 0.32 | 0.30 | 0.30 | 0.49 | 0.28 | 0.62 |
|          | rs4789773  | A/G | CDS      | N | -   | -   | -    | -    | -    | -    | -    | -    | -    |
| HHAT     | rs4366378  | A/C | 3'UTR    | N | -   | -   | -    | -    | -    | -    | -    | -    | -    |
|          | rs688585   | A/T | Promoter | N | -   | -   | -    | -    | -    | -    | -    | -    | -    |
|          | rs2294851  | G/A | IVS      | N | -   | -   | -    | -    | -    | -    | -    | -    | -    |
| HIBCH    | rs1372053  | G/T | Promoter | Y | 0   | 0   | -    | -    | -    | -    | -    | -    | -    |
|          | rs291466   | A/G | CDS      | Y | 100 | 99  | 0.13 | 0.15 | 0.95 | 0.19 | 0.09 | 0.99 | 0.14 |
|          | rs1058180  | T/C | CDS      | N | -   | -   | -    | -    | -    | -    | -    | -    | -    |
|          | rs3749022  | C/T | 5'UTR    | N | -   | -   | -    | -    | -    | -    | -    | -    | -    |
| HMGCR    | rs3761740  | A/C | Promoter | Y | 100 | 100 | 0.02 | 0.02 | 0.02 | -    | -    | -    | -    |
| HNMT     | rs6430764  | C/T | Promoter | N | -   | -   | -    | -    | -    | -    | -    | -    | -    |
|          | rs12995000 | C/T | Promoter | N | -   | -   | -    | -    | -    | -    | -    | -    | -    |
| HPD      | rs1154510  | G/A | 5'UTR    | N | -   | -   | -    | -    | -    | -    | -    | -    | -    |
|          | rs2596143  | C/T | 5'UTR    | N | -   | -   | -    | -    | -    | -    | -    | -    | -    |
| HSD17B11 | rs12644152 | G/A | Promoter | Y | 100 | 100 | 0.31 | 0.26 | 0.38 | 0.01 | 0.01 | 0.17 | 0.01 |
|          | rs13138404 | C/T | Promoter | N | -   | -   | -    | -    | -    | -    | -    | -    | -    |
| HSD17B12 | rs11037557 | A/T | Promoter | Y | 100 | 100 | 0.03 | 0.03 | 0.44 | -    | -    | -    | -    |



|          |            |     |          |   |     |     |      |      |      |      |      |      |      |   |
|----------|------------|-----|----------|---|-----|-----|------|------|------|------|------|------|------|---|
|          | rs12364003 | C/G | Promoter | Y | 0   | 0   | -    | -    | -    | -    | -    | -    | -    | - |
| HSD17B14 | rs8110220  | C/T | CDS      | Y | 78  | 90  | 0.17 | 0.16 | 0.00 | -    | -    | -    | -    | - |
| HSDL1    | rs4378600  | C/G | CDS      | Y | 98  | 99  | 0.21 | 0.20 | 0.98 | 0.83 | 0.85 | 0.55 | 0.57 |   |
| HSDL2    | rs10115837 | A/T | Promoter | Y | 99  | 99  | 0.30 | 0.32 | 0.64 | 0.34 | 0.54 | 0.16 | 0.27 |   |
|          | rs3813857  | C/T | Promoter | Y | 99  | 99  | 0.03 | 0.03 | 0.48 | -    | -    | -    | -    |   |
|          | rs6477923  | A/G | Promoter | Y | 94  | 93  | 0.22 | 0.19 | 0.32 | -    | -    | -    | -    |   |
| HSPC105  | rs3813012  | C/T | CDS      | Y | 99  | 99  | 0.01 | 0.01 | 0.76 | -    | -    | -    | -    |   |
| HTR3E    | rs6443950  | A/T | Promoter | Y | 100 | 100 | 0.17 | 0.15 | 0.18 | 0.25 | 0.92 | 0.13 | 0.20 |   |
| IFITM2   | rs1058900  | C/T | CDS      | N | -   | -   | -    | -    | -    | -    | -    | -    | -    |   |
|          | rs3809112  | C/T | Promoter | N | -   | -   | -    | -    | -    | -    | -    | -    | -    |   |
|          | rs10398    | A/G | 5'UTR    | N | -   | -   | -    | -    | -    | -    | -    | -    | -    |   |
| INMT     | rs2302339  | A/G | CDS      | Y | 98  | 97  | 0.12 | 0.12 | 0.68 | 0.91 | 0.84 | 0.86 | 0.89 |   |
|          | rs6970396  | A/G | 3'UTR    | N | -   | -   | -    | -    | -    | -    | -    | -    | -    |   |
|          | rs741872   | A/G | Promoter | N | -   | -   | -    | -    | -    | -    | -    | -    | -    |   |
|          | rs4720015  | G/T | CDS      | N | -   | -   | -    | -    | -    | -    | -    | -    | -    |   |
| KIAA0907 | rs2275079  | C/T | IVS      | Y | 96  | 98  | 0.06 | 0.06 | 0.15 | 0.19 | 0.54 | 0.98 | 0.39 |   |
|          | rs6660802  | A/G | Promoter | Y | 100 | 100 | 0.06 | 0.05 | 0.15 | 0.22 | 0.98 | 0.91 | 0.71 |   |
| KYNU     | rs2016775  | A/T | Promoter | Y | 98  | 97  | 0.16 | 0.15 | 0.81 | 0.50 | 0.23 | 0.34 | 0.23 |   |
|          | rs10496935 | C/G | IVS      | N | -   | -   | -    | -    | -    | -    | -    | -    | -    |   |
|          | rs1050951  | G/A | IVS      | N | -   | -   | -    | -    | -    | -    | -    | -    | -    |   |
| LCMT1    | rs3809680  | C/T | Promoter | Y | 86  | 92  | 0.00 | 0.00 | -    | -    | -    | -    | -    |   |
| LCMT2    | rs3742971  | C/A | 5'UTR    | N | -   | -   | -    | -    | -    | -    | -    | -    | -    |   |
|          | rs3742970  | C/A | Promoter | N | -   | -   | -    | -    | -    | -    | -    | -    | -    |   |
| LIPL1    | rs2576168  | C/T | Promoter | Y | 100 | 100 | 0.39 | 0.40 | 0.87 | 0.72 | 0.41 | 0.95 | 0.63 |   |
| LIPL2    | None       | -   | -        | - | -   | -   | -    | -    | -    | -    | -    | -    | -    |   |
| LOXHD1   | rs12606417 | C/T | CDS      | N | -   | -   | -    | -    | -    | -    | -    | -    | -    |   |
|          | rs1893566  | C/T | CDS      | Y | 100 | 100 | 0.37 | 0.35 | 0.85 | 0.65 | 0.41 | 0.52 | 0.36 |   |
|          | rs674948   | A/G | 5'UTR    | Y | 100 | 100 | 0.25 | 0.25 | 0.89 | 0.90 | 0.94 | 0.64 | 0.81 |   |
| LOXL1    | rs3825942  | G/A | CDS      | N | -   | -   | -    | -    | -    | -    | -    | -    | -    |   |
| LOXL2    | rs1063582  | A/C | CDS      | N | -   | -   | -    | -    | -    | -    | -    | -    | -    |   |
|          | rs6985160  | C/T | IVS      | Y | 100 | 100 | 0.10 | 0.10 | 0.62 | 0.56 | 0.75 | 0.34 | 0.60 |   |
|          | rs6999447  | C/T | IVS      | N | -   | -   | -    | -    | -    | -    | -    | -    | -    |   |
| LOXL3    | rs17010021 | A/T | CDS      | Y | 100 | 100 | 0.37 | 0.38 | 0.03 | -    | -    | -    | -    |   |
| LOXL4    | rs1983864  | T/G | CDS      | N | -   | -   | -    | -    | -    | -    | -    | -    | -    |   |
| LPO      | rs8178289  | A/C | IVS      | Y | 100 | 98  | 0.02 | 0.02 | 0.63 | -    | -    | -    | -    |   |
|          | rs8178290  | A/C | IVS      | Y | 96  | 96  | 0.11 | 0.12 | 0.62 | 0.37 | 0.18 | 0.68 | 0.48 |   |
|          | rs7501989  | C/T | Promoter | Y | 100 | 100 | 0.15 | 0.17 | 0.37 | 0.69 | 0.43 | 0.56 | 0.38 |   |
|          | rs2301870  | G/A | CDS      | N | -   | -   | -    | -    | -    | -    | -    | -    | -    |   |
| LTA4H    | rs2540487  | A/G | Promoter | Y | 97  | 98  | 0.20 | 0.17 | 0.53 | 0.18 | 0.20 | 0.09 | 0.06 |   |
|          | rs2660899  | G/T | Promoter | N | -   | -   | -    | -    | -    | -    | -    | -    | -    |   |
| LYCAT    | rs13413678 | C/T | Promoter | Y | 100 | 100 | 0.20 | 0.19 | 0.02 | -    | -    | -    | -    |   |
|          | rs829618   | A/G | IVS      | Y | 84  | 85  | 0.07 | 0.07 | 0.07 | -    | -    | -    | -    |   |

|          |            |     |          |   |     |     |      |      |      |      |      |      |      |
|----------|------------|-----|----------|---|-----|-----|------|------|------|------|------|------|------|
| MBOAT1   | rs1077919  | C/T | Promoter | Y | 100 | 100 | 0.08 | 0.07 | 0.19 | 0.75 | 0.56 | 0.51 | 0.47 |
| MBOAT5   | rs17790962 | A/G | IVS      | Y | 100 | 100 | 0.17 | 0.15 | 0.05 | -    | -    | -    | -    |
| ME2      | rs16952692 | C/T | CDS      | Y | 100 | 100 | 0.00 | 0.00 | -    | -    | -    | -    | -    |
|          | rs687550   | A/T | Promoter | Y | 100 | 100 | 0.11 | 0.11 | 0.71 | 0.62 | 0.48 | 0.49 | 0.64 |
| ME3      | rs682915   | A/G | Promoter | Y | 100 | 100 | 0.43 | 0.41 | 0.32 | 0.82 | 0.58 | 0.72 | 0.57 |
|          | rs670736   | G/A | Promoter | N | -   | -   | -    | -    | -    | -    | -    | -    | -    |
| MECR     | rs1128400  | G/A | CDS      | N | -   | -   | -    | -    | -    | -    | -    | -    | -    |
| METT10D  | rs11078210 | C/T | Promoter | N | -   | -   | -    | -    | -    | -    | -    | -    | -    |
| METT11D1 | rs2297717  | C/G | CDS      | Y | 99  | 100 | 0.13 | 0.10 | 0.34 | 0.02 | 0.01 | 0.99 | 0.01 |
|          | rs2783781  | C/G | Promoter | Y | 100 | 100 | 0.26 | 0.28 | 0.39 | 0.22 | 0.84 | 0.09 | 0.15 |
|          | rs2771342  | C/T | Promoter | N | -   | -   | -    | -    | -    | -    | -    | -    | -    |
| METT5D1  | rs12360577 | A/C | Promoter | Y | 100 | 100 | 0.31 | 0.30 | 0.17 | 0.29 | 0.91 | 0.12 | 0.54 |
| METTL1   | rs703842   | C/T | 3'UTR    | Y | 99  | 98  | 0.32 | 0.30 | 0.76 | 0.53 | 0.52 | 0.25 | 0.32 |
|          | rs2291617  | G/T | 5'UTR    | N | -   | -   | -    | -    | -    | -    | -    | -    | -    |
| METTL4   | rs2644189  | A/G | 5'UTR    | Y | 95  | 93  | 0.13 | 0.14 | 0.63 | -    | -    | -    | -    |
|          | rs3817349  | A/C | 5'UTR    | Y | 100 | 100 | 0.12 | 0.13 | 0.47 | 0.65 | 0.35 | 0.62 | 0.48 |
|          | rs2677879  | T/G | CDS      | N | -   | -   | -    | -    | -    | -    | -    | -    | -    |
|          | rs2677893  | G/A | Promoter | N | -   | -   | -    | -    | -    | -    | -    | -    | -    |
| METTL7B  | rs4759187  | C/T | Promoter | N | -   | -   | -    | -    | -    | -    | -    | -    | -    |
| METTL8   | rs6751956  | C/T | Promoter | Y | 100 | 98  | 0.31 | 0.32 | 0.68 | 0.74 | 0.58 | 0.88 | 0.72 |
| METTL9   | rs3091402  | A/G | IVS      | Y | 82  | 88  | 0.39 | 0.40 | 0.51 | -    | -    | -    | -    |
|          | rs3759990  | C/G | Promoter | N | -   | -   | -    | -    | -    | -    | -    | -    | -    |
| MOGAT1   | rs10169223 | A/G | Promoter | N | -   | -   | -    | -    | -    | -    | -    | -    | -    |
|          | rs1868024  | C/T | CDS      | Y | 100 | 100 | 0.12 | 0.11 | 0.50 | 0.60 | 0.82 | 0.38 | 0.45 |
| MOGAT2   | rs555939   | G/T | Promoter | Y | 0   | 0   | -    | -    | -    | -    | -    | -    | -    |
|          | rs554202   | A/G | CDS      | N | -   | -   | -    | -    | -    | -    | -    | -    | -    |
| MSRA     | rs10098474 | C/T | Promoter | Y | 95  | 91  | 0.44 | 0.42 | 0.00 | -    | -    | -    | -    |
| MSRB2    | rs2296466  | A/G | CDS      | Y | 98  | 97  | 0.17 | 0.18 | 0.86 | 0.75 | 0.56 | 0.89 | 0.58 |
|          | rs2886428  | A/C | Promoter | Y | 100 | 100 | 0.27 | 0.27 | 0.79 | 0.95 | 0.83 | 0.88 | 0.98 |
| N6AMT1   | rs2738966  | G/A | Promoter | N | -   | -   | -    | -    | -    | -    | -    | -    | -    |
|          | rs2859734  | A/G | Promoter | N | -   | -   | -    | -    | -    | -    | -    | -    | -    |
| N6AMT2   | rs3924006  | A/T | IVS      | Y | 100 | 100 | 0.29 | 0.30 | 0.41 | 0.69 | 0.43 | 0.88 | 0.83 |
|          | rs3936081  | A/G | Promoter | N | -   | -   | -    | -    | -    | -    | -    | -    | -    |
| NANP     | rs6037164  | C/T | Promoter | Y | 100 | 100 | 0.06 | 0.07 | 0.91 | 0.14 | 0.22 | 0.98 | 0.15 |
| NDUFA11  | rs6510862  | A/C | Promoter | N | -   | -   | -    | -    | -    | -    | -    | -    | -    |
|          | rs8108064  | G/T | 5'UTR    | N | -   | -   | -    | -    | -    | -    | -    | -    | -    |
| NDUFB1   | rs12886909 | C/T | Promoter | N | -   | -   | -    | -    | -    | -    | -    | -    | -    |
|          | rs7148709  | G/A | Promoter | N | -   | -   | -    | -    | -    | -    | -    | -    | -    |
| NDUFB5   | rs2339844  | A/C | Promoter | Y | 100 | 100 | 0.12 | 0.13 | 0.53 | 0.72 | 0.45 | 0.77 | 0.45 |
| NDUFS3   | rs2280231  | C/T | Promoter | Y | 0   | 0   | -    | -    | -    | -    | -    | -    | -    |
| NDUFS7   | rs3848638  | G/T | Promoter | N | -   | -   | -    | -    | -    | -    | -    | -    | -    |
| NDUFV3   | rs1573472  | A/G | Promoter | Y | 0   | 0   | -    | -    | -    | -    | -    | -    | -    |

|         |            |     |          |   |     |     |      |      |      |      |      |      |      |   |
|---------|------------|-----|----------|---|-----|-----|------|------|------|------|------|------|------|---|
| NOX3    | rs3749930  | G/T | CDS      | N | -   | -   | -    | -    | -    | -    | -    | -    | -    | - |
| NOX5    | rs12907196 | C/T | CDS      | Y | 100 | 100 | 0.12 | 0.11 | 0.49 | 0.48 | 0.88 | 0.26 | 0.66 |   |
|         | rs2277552  | C/T | CDS      | Y | 100 | 100 | 0.19 | 0.22 | 0.02 | -    | -    | -    | -    |   |
|         | rs3743093  | A/G | IVS      | N | -   | -   | -    | -    | -    | -    | -    | -    | -    |   |
|         | rs3743091  | G/T | IVS      | N | -   | -   | -    | -    | -    | -    | -    | -    | -    |   |
| NSUN2   | rs2303707  | G/T | IVS      | Y | 100 | 100 | 0.36 | 0.38 | 0.88 | 0.60 | 0.37 | 0.32 | 0.25 |   |
|         | rs2303708  | A/G | CDS      | Y | 90  | 92  | 0.06 | 0.07 | 0.71 | -    | -    | -    | -    |   |
|         | rs3776448  | A/G | 3'UTR    | Y | 98  | 97  | 0.26 | 0.26 | 0.23 | 0.49 | 0.28 | 0.87 | 0.79 |   |
| NUP188  | None       | -   | -        | - | -   | -   | -    | -    | -    | -    | -    | -    | -    |   |
| OLR1    | rs11053646 | C/G | CDS      | Y | 88  | 89  | 0.18 | 0.18 | 0.96 | -    | -    | -    | -    |   |
| OR51B2  | rs10837814 | A/G | CDS      | Y | 100 | 100 | 0.31 | 0.32 | 0.01 | -    | -    | -    | -    |   |
|         | rs10837822 | C/T | Promoter | Y | 100 | 100 | 0.15 | 0.14 | 0.42 | 0.71 | 0.89 | 0.35 | 0.69 |   |
|         | rs11036814 | A/C | CDS      | Y | 93  | 95  | 0.17 | 0.18 | 0.76 | -    | -    | -    | -    |   |
|         | rs11036815 | A/G | CDS      | Y | 85  | 91  | 0.18 | 0.18 | 0.92 | -    | -    | -    | -    |   |
|         | rs7933257  | A/G | 3'UTR    | N | -   | -   | -    | -    | -    | -    | -    | -    | -    |   |
| OXA1L   | rs17619    | A/G | CDS      | Y | 98  | 100 | 0.03 | 0.03 | 0.59 | -    | -    | -    | -    |   |
|         | rs8572     | T/C | CDS      | N | -   | -   | -    | -    | -    | -    | -    | -    | -    |   |
| OXNAD1  | rs14080    | C/G | Promoter | Y | 99  | 100 | 0.48 | 0.48 | 0.52 | 0.87 | 0.75 | 0.77 | 1.00 |   |
|         | rs6777976  | C/T | CDS      | Y | 100 | 100 | 0.12 | 0.14 | 0.81 | 0.63 | 0.39 | 0.68 | 0.38 |   |
| P4HA1   | rs7918396  | C/T | Promoter | Y | 0   | 0   | -    | -    | -    | -    | -    | -    | -    |   |
| P4HA3   | rs3741132  | C/T | 3'UTR    | Y | 100 | 100 | 0.25 | 0.28 | 0.70 | 0.08 | 0.15 | 0.05 | 0.05 |   |
| P4HB    | rs12452016 | A/T | Promoter | Y | 99  | 99  | 0.30 | 0.29 | 0.56 | 0.85 | 0.57 | 0.71 | 0.59 |   |
|         | rs8077337  | A/G | Promoter | Y | 98  | 94  | 0.26 | 0.28 | 0.77 | -    | -    | -    | -    |   |
| PAFAH2  | rs11247841 | C/T | 5'UTR    | Y | 99  | 100 | 0.33 | 0.30 | 0.82 | 0.26 | 0.09 | 0.56 | 0.12 |   |
|         | rs2992056  | C/T | IVS      | Y | 100 | 100 | 0.24 | 0.22 | 0.14 | 0.24 | 0.15 | 0.75 | 0.30 |   |
| PAH     | rs7485331  | A/C | Promoter | Y | 99  | 100 | 0.23 | 0.24 | 0.13 | 0.35 | 0.20 | 0.81 | 0.48 |   |
| PCYOX1L | rs2454107  | A/T | Promoter | Y | 100 | 99  | 0.38 | 0.37 | 0.69 | 0.32 | 0.22 | 0.76 | 0.47 |   |
| PECR    | rs9288513  | A/T | CDS      | Y | 100 | 100 | 0.31 | 0.30 | 0.63 | 0.61 | 0.31 | 0.62 | 0.32 |   |
| PEMT    | rs2278952  | C/T | 5'UTR    | Y | 100 | 100 | 0.07 | 0.08 | 0.95 | 0.63 | 0.48 | 0.33 | 0.39 |   |
|         | rs7946     | C/T | CDS      | N | -   | -   | -    | -    | -    | -    | -    | -    | -    |   |
| PHYH    | rs11133    | A/G | 3'UTR    | Y | 100 | 100 | 0.19 | 0.19 | 0.30 | 0.99 | 0.98 | 0.89 | 0.89 |   |
|         | rs4615920  | A/G | Promoter | Y | 91  | 92  | 0.09 | 0.06 | 0.89 | -    | -    | -    | -    |   |
|         | rs3802587  | G/A | IVS      | N | -   | -   | -    | -    | -    | -    | -    | -    | -    |   |
|         | rs608353   | G/T | IVS      | N | -   | -   | -    | -    | -    | -    | -    | -    | -    |   |
|         | rs511959   | C/G | IVS      | N | -   | -   | -    | -    | -    | -    | -    | -    | -    |   |
| PHYHIP  | rs7821707  | A/G | IVS      | Y | 100 | 98  | 0.32 | 0.29 | 0.65 | 0.34 | 0.24 | 0.26 | 0.16 |   |
|         | rs3888282  | A/C | Promoter | N | -   | -   | -    | -    | -    | -    | -    | -    | -    |   |
| PHYHIPL | rs2452505  | C/G | CDS      | Y | 98  | 99  | 0.12 | 0.10 | 0.71 | 0.19 | 0.76 | 0.08 | 0.10 |   |
| PLOD1   | rs7551175  | A/G | CDS      | N | -   | -   | -    | -    | -    | -    | -    | -    | -    |   |
| PLOD2   | rs6710     | A/G | 3'UTR    | N | -   | -   | -    | -    | -    | -    | -    | -    | -    |   |
| PLOD3   | rs17319250 | C/T | 5'UTR    | Y | 85  | 88  | 0.17 | 0.19 | 0.25 | -    | -    | -    | -    |   |
|         | rs2074685  | C/T | Promoter | Y | 99  | 100 | 0.23 | 0.26 | 0.77 | 0.26 | 0.47 | 0.17 | 0.16 |   |

|         |            |     |          |   |     |     |      |      |      |      |      |      |      |   |
|---------|------------|-----|----------|---|-----|-----|------|------|------|------|------|------|------|---|
| PNMT    | rs876493   | G/A | 5'UTR    | N | -   | -   | -    | -    | -    | -    | -    | -    | -    | - |
| POMT2   | rs2193594  | A/G | Promoter | Y | 100 | 99  | 0.49 | 0.44 | 0.99 | 0.04 | 0.03 | 0.13 | 0.02 |   |
| PPOX    | rs2301286  | A/C | 5'UTR    | N | -   | -   | -    | -    | -    | -    | -    | -    | -    |   |
| PRMT2   | rs2277829  | G/T | 5'UTR    | N | -   | -   | -    | -    | -    | -    | -    | -    | -    |   |
| PRMT3   | rs10741836 | C/T | IVS      | Y | 100 | 100 | 0.36 | 0.34 | 0.75 | 0.42 | 0.34 | 0.17 | 0.17 |   |
|         | rs2270678  | G/C | 5'UTR    | N | -   | -   | -    | -    | -    | -    | -    | -    | -    |   |
|         | rs3758805  | C/G | CDS      | Y | 99  | 99  | 0.08 | 0.07 | 0.21 | 0.60 | 0.85 | 0.29 | 0.72 |   |
| PRMT6   | rs1730850  | A/G | Promoter | Y | 99  | 100 | 0.31 | 0.31 | 0.44 | 0.15 | 0.69 | 0.10 | 0.66 |   |
|         | rs2232016  | C/T | CDS      | Y | 0   | 0   | -    | -    | -    | -    | -    | -    | -    |   |
| PRMT7   | rs2863978  | A/G | Promoter | Y | 100 | 100 | 0.23 | 0.23 | 0.63 | 0.98 | 0.74 | 0.98 | 0.88 |   |
|         | rs8063446  | A/C | Promoter | N | -   | -   | -    | -    | -    | -    | -    | -    | -    |   |
| PRMT8   | rs3741936  | C/T | IVS      | Y | 95  | 94  | 0.31 | 0.33 | 0.38 | -    | -    | -    | -    |   |
| PRODH2  | rs3761097  | T/C | CDS      | N | -   | -   | -    | -    | -    | -    | -    | -    | -    |   |
| PTRH1   | rs3802357  | C/T | Promoter | Y | 86  | 85  | 0.29 | 0.27 | 0.63 | -    | -    | -    | -    |   |
| PYCR1   | rs4268798  | C/T | IVS      | N | -   | -   | -    | -    | -    | -    | -    | -    | -    |   |
| PYCRL   | rs4874171  | C/T | Promoter | Y | 99  | 99  | 0.18 | 0.19 | 0.40 | 0.26 | 0.96 | 0.11 | 0.57 |   |
|         | rs2242089  | T/C | CDS      | N | -   | -   | -    | -    | -    | -    | -    | -    | -    |   |
|         | rs3812442  | C/T | Promoter | N | -   | -   | -    | -    | -    | -    | -    | -    | -    |   |
| QDPR    | None       | -   | -        | - | -   | -   | -    | -    | -    | -    | -    | -    | -    |   |
| RDH11   | rs1997896  | A/T | Promoter | Y | 99  | 100 | 0.41 | 0.44 | 0.87 | 0.25 | 0.36 | 0.10 | 0.13 |   |
|         | rs3759768  | A/G | Promoter | Y | 99  | 99  | 0.21 | 0.22 | 0.99 | 0.92 | 0.84 | 0.62 | 0.63 |   |
| RG9MTD2 | rs10026790 | A/G | 5'UTR    | Y | 100 | 100 | 0.15 | 0.14 | 0.81 | 0.98 | 0.87 | 0.93 | 0.97 |   |
|         | rs11097669 | A/G | IVS      | N | -   | -   | -    | -    | -    | -    | -    | -    | -    |   |
| RG9MTD3 | rs7873440  | C/T | Promoter | N | -   | -   | -    | -    | -    | -    | -    | -    | -    |   |
|         | rs7873428  | C/T | Promoter | N | -   | -   | -    | -    | -    | -    | -    | -    | -    |   |
| RNMTL1  | rs16955542 | G/A | Promoter | N | -   | -   | -    | -    | -    | -    | -    | -    | -    |   |
|         | rs2249542  | A/G | CDS      | Y | 100 | 99  | 0.12 | 0.11 | 0.92 | 0.84 | 1.00 | 0.55 | 0.58 |   |
|         | rs2750012  | A/G | IVS      | N | -   | -   | -    | -    | -    | -    | -    | -    | -    |   |
|         | rs3760495  | C/T | Promoter | Y | 100 | 100 | 0.33 | 0.34 | 0.99 | 0.41 | 0.84 | 0.16 | 0.41 |   |
| RXRB    | rs7753248  | A/G | 3'UTR    | Y | 100 | 100 | 0.23 | 0.23 | 0.58 | 0.97 | 1.00 | 0.90 | 0.92 |   |
| RXRG    | rs1467664  | A/G | Promoter | Y | 99  | 99  | 0.29 | 0.27 | 0.78 | 0.62 | 0.35 | 0.44 | 0.29 |   |
| SCO1    | rs3809732  | A/C | Promoter | Y | 100 | 100 | 0.14 | 0.14 | 0.09 | 0.53 | 0.34 | 0.78 | 0.99 |   |
| SCO2    | None       | -   | -        | - | -   | -   | -    | -    | -    | -    | -    | -    | -    |   |
| SERHL2  | rs137055   | C/T | CDS      | N | -   | -   | -    | -    | -    | -    | -    | -    | -    |   |
| SETD2   | rs12493723 | C/T | Promoter | Y | 100 | 100 | 0.16 | 0.17 | 0.83 | 0.75 | 0.81 | 0.59 | 0.58 |   |
|         | rs4082155  | A/G | CDS      | N | -   | -   | -    | -    | -    | -    | -    | -    | -    |   |
| SGPP2   | rs6758392  | C/T | Promoter | Y | 100 | 100 | 0.28 | 0.28 | 0.43 | 0.76 | 0.68 | 0.63 | 0.90 |   |
| SGSH    | rs7503034  | C/T | CDS      | Y | 100 | 100 | 0.32 | 0.34 | 0.83 | 0.27 | 0.13 | 0.86 | 0.31 |   |
| SMOX    | rs2422915  | C/G | Promoter | Y | 100 | 100 | 0.06 | 0.07 | 0.45 | 0.49 | 0.27 | 0.99 | 0.29 |   |
| SOAT1   | rs12408349 | A/C | Promoter | Y | 0   | 0   | -    | -    | -    | -    | -    | -    | -    |   |
|         | rs10913709 | C/T | IVS      | Y | 100 | 100 | 0.03 | 0.05 | 0.23 | -    | -    | -    | -    |   |
|         | rs3753527  | C/T | IVS      | Y | 98  | 98  | 0.09 | 0.08 | 0.93 | 0.87 | 0.63 | 0.78 | 0.61 |   |

|         |            |     |          |   |     |     |      |      |      |      |      |      |      |
|---------|------------|-----|----------|---|-----|-----|------|------|------|------|------|------|------|
| SOAT2   | rs2280698  | A/G | 5'UTR    | Y | 100 | 99  | 0.17 | 0.15 | 0.28 | 0.49 | 0.29 | 0.93 | 0.35 |
|         | rs2272296  | C/T | CDS      | N | -   | -   | -    | -    | -    | -    | -    | -    | -    |
| SRD5A2L | rs2538     | C/T | 3'UTR    | N | -   | -   | -    | -    | -    | -    | -    | -    | -    |
| SULT1B1 | rs2292092  | A/C | IVS      | Y | 100 | 100 | 0.40 | 0.40 | 0.48 | 0.96 | 0.89 | 0.81 | 0.83 |
|         | rs11569731 | C/T | IVS      | Y | 100 | 100 | 0.04 | 0.05 | 0.23 | -    | -    | -    | -    |
| SULT1C2 | rs1402467  | C/G | CDS      | Y | 99  | 100 | 0.09 | 0.10 | 0.18 | 0.87 | 0.72 | 0.81 | 0.70 |
|         | rs3731686  | A/G | IVS      | Y | 100 | 100 | 0.02 | 0.03 | 0.52 | -    | -    | -    | -    |
| SULT1C3 | rs2219078  | A/G | CDS      | Y | 100 | 100 | 0.24 | 0.25 | 0.09 | 0.70 | 0.63 | 0.63 | 0.82 |
| SULT2B1 | rs3760808  | C/T | Promoter | N | -   | -   | -    | -    | -    | -    | -    | -    | -    |
| SULT4A1 | rs138109   | A/C | Promoter | Y | 82  | 82  | 0.38 | 0.39 | 0.02 | -    | -    | -    | -    |
|         | rs138110   | G/A | Promoter | N | -   | -   | -    | -    | -    | -    | -    | -    | -    |
| SULT6B1 | rs11569755 | C/G | IVS      | Y | 99  | 99  | 0.21 | 0.22 | 0.87 | 0.47 | 0.33 | 0.36 | 0.26 |
| TDO2    | rs10857287 | A/G | Promoter | Y | 100 | 100 | 0.11 | 0.13 | 0.46 | 0.26 | 0.95 | 0.12 | 0.18 |
| TPH2    | rs7963803  | A/C | Promoter | Y | 96  | 96  | 0.16 | 0.16 | 0.38 | 0.64 | 0.49 | 0.65 | 0.85 |
|         | rs4570625  | G/T | Promoter | N | -   | -   | -    | -    | -    | -    | -    | -    | -    |
| TPO     | rs1042589  | C/G | 3'UTR    | Y | 100 | 100 | 0.44 | 0.43 | 0.11 | 0.64 | 0.34 | 0.46 | 0.30 |
|         | rs2071400  | C/T | Promoter | Y | 100 | 100 | 0.36 | 0.34 | 0.87 | 0.40 | 0.60 | 0.30 | 0.37 |
|         | rs2071402  | A/G | Promoter | Y | 100 | 99  | 0.19 | 0.21 | 0.69 | 0.69 | 0.84 | 0.41 | 0.44 |
|         | rs2298876  | A/G | Promoter | Y | 100 | 100 | 0.36 | 0.38 | 0.45 | 0.59 | 0.99 | 0.31 | 0.62 |
|         | rs4927611  | G/T | CDS      | N | -   | -   | -    | -    | -    | -    | -    | -    | -    |
|         | rs732609   | A/C | CDS      | N | -   | -   | -    | -    | -    | -    | -    | -    | -    |
| TRMT1   | rs1126799  | C/T | CDS      | N | -   | -   | -    | -    | -    | -    | -    | -    | -    |
|         | rs2302159  | A/G | Promoter | Y | 100 | 99  | 0.05 | 0.04 | 0.42 | -    | -    | -    | -    |
| TRMT12  | rs3812475  | C/T | CDS      | Y | 100 | 100 | 0.40 | 0.44 | 0.91 | 0.08 | 0.02 | 0.20 | 0.03 |
|         | rs4132855  | C/T | Promoter | Y | 100 | 100 | 0.24 | 0.26 | 0.59 | 0.24 | 0.08 | 0.61 | 0.27 |
| TRMT5   | rs6981043  | C/G | Promoter | Y | 90  | 90  | 0.17 | 0.19 | 0.88 | -    | -    | -    | -    |
|         | rs17097938 | C/G | Promoter | Y | 100 | 100 | 0.09 | 0.08 | 0.88 | 0.99 | 0.86 | 0.90 | 0.88 |
|         | rs2296923  | A/G | Promoter | Y | 100 | 100 | 0.23 | 0.24 | 0.44 | 0.69 | 0.46 | 0.87 | 0.68 |
|         | rs2296924  | C/T | Promoter | Y | 98  | 100 | 0.22 | 0.23 | 0.79 | 0.79 | 0.54 | 0.72 | 0.71 |
| TXNRD2  | rs5748469  | A/C | CDS      | N | -   | -   | -    | -    | -    | -    | -    | -    | -    |
|         | rs737865   | G/A | IVS      | N | -   | -   | -    | -    | -    | -    | -    | -    | -    |
|         | rs737866   | A/G | IVS      | N | -   | -   | -    | -    | -    | -    | -    | -    | -    |
| UCRC    | rs14115    | A/G | CDS      | Y | 97  | 98  | 0.09 | 0.07 | 0.61 | 0.02 | 0.05 | 0.97 | 0.12 |
| UQCRC1  | rs17080284 | C/G | CDS      | Y | 99  | 99  | 0.06 | 0.04 | 0.45 | -    | -    | -    | -    |
| UQCRC2  | rs2965807  | C/A | Promoter | N | -   | -   | -    | -    | -    | -    | -    | -    | -    |
| UQCRQ   | rs11748063 | C/T | Promoter | Y | 93  | 91  | 0.01 | 0.02 | 0.00 | -    | -    | -    | -    |
|         | rs30180    | C/T | Promoter | Y | 100 | 100 | 0.32 | 0.33 | 0.10 | 0.95 | 0.89 | 0.76 | 0.80 |
|         | rs17166294 | C/T | Promoter | N | -   | -   | -    | -    | -    | -    | -    | -    | -    |
| USP40   | rs838543   | C/T | CDS      | Y | 99  | 100 | 0.09 | 0.08 | 0.69 | 0.34 | 0.22 | 0.39 | 0.27 |
| USP43   | None       | -   | -        | - | -   | -   | -    | -    | -    | -    | -    | -    | -    |
| USP48   | rs2315930  | C/T | Promoter | Y | 100 | 98  | 0.04 | 0.02 | 0.59 | -    | -    | -    | -    |
| VPS13A  | rs3824545  | A/G | Promoter | Y | 91  | 81  | 0.16 | 0.16 | 0.91 | -    | -    | -    | -    |



|        |            |     |          |   |     |     |      |      |      |      |      |      |      |   |
|--------|------------|-----|----------|---|-----|-----|------|------|------|------|------|------|------|---|
| ADH7   | rs17537595 | G/A | Promoter | N | -   | -   | -    | -    | -    | -    | -    | -    | -    | - |
| ADRB1  | rs1801253  | C/G | CDS      | N | -   | -   | -    | -    | -    | -    | -    | -    | -    | - |
| ADRB2  | rs2895795  | T/A | Promoter | N | -   | -   | -    | -    | -    | -    | -    | -    | -    | - |
|        | rs33947624 | G/A | Promoter | N | -   | -   | -    | -    | -    | -    | -    | -    | -    | - |
|        | rs17334228 | C/T | Promoter | N | -   | -   | -    | -    | -    | -    | -    | -    | -    | - |
|        | rs1042711  | C/T | 5'UTR    | N | -   | -   | -    | -    | -    | -    | -    | -    | -    | - |
|        | rs1042713  | A/G | CDS      | N | -   | -   | -    | -    | -    | -    | -    | -    | -    | - |
|        | rs12654778 | A/G | Promoter | Y | 100 | 100 | 0.42 | 0.42 | 0.74 | 0.95 | 0.91 | 0.71 | 0.85 |   |
|        | rs11168070 | C/G | Promoter | Y | 99  | 98  | 0.09 | 0.09 | 0.54 | 0.61 | 0.83 | 0.45 | 0.68 |   |
|        | rs17108803 | G/T | Promoter | Y | 100 | 100 | 0.05 | 0.05 | 0.68 | -    | -    | -    | -    |   |
|        | rs2400707  | A/G | Promoter | Y | 100 | 99  | 0.21 | 0.23 | 0.51 | 0.48 | 0.40 | 0.37 | 0.29 |   |
| AFF1   | rs340638   | G/A | IVS      | N | -   | -   | -    | -    | -    | -    | -    | -    | -    |   |
| AFF4   | rs3798123  | A/G | Promoter | Y | 91  | 83  | 0.29 | 0.30 | 0.06 | -    | -    | -    | -    |   |
|        | rs2288386  | T/C | IVS      | N | -   | -   | -    | -    | -    | -    | -    | -    | -    |   |
|        | rs2288387  | A/G | IVS      | N | -   | -   | -    | -    | -    | -    | -    | -    | -    |   |
|        | rs3798122  | C/A | Promoter | N | -   | -   | -    | -    | -    | -    | -    | -    | -    |   |
| AGPAT2 | rs3812611  | G/A | Promoter | N | -   | -   | -    | -    | -    | -    | -    | -    | -    |   |
| AGT    | rs11122576 | A/G | IVS      | Y | 100 | 100 | 0.35 | 0.38 | 0.09 | 0.04 | 0.45 | 0.02 | 0.08 |   |
|        | rs4762     | C/T | CDS      | Y | 100 | 100 | 0.11 | 0.11 | 0.31 | 0.39 | 0.92 | 0.16 | 0.66 |   |
|        | rs5045     | C/G | Promoter | Y | 100 | 100 | 0.00 | 0.00 | -    | -    | -    | -    | -    |   |
|        | rs5046     | G/A | Promoter | N | -   | -   | -    | -    | -    | -    | -    | -    | -    |   |
|        | rs5047     | T/C | 5'UTR    | N | -   | -   | -    | -    | -    | -    | -    | -    | -    |   |
|        | rs5048     | G/A | 5'UTR    | N | -   | -   | -    | -    | -    | -    | -    | -    | -    |   |
|        | rs5049     | T/C | 5'UTR    | N | -   | -   | -    | -    | -    | -    | -    | -    | -    |   |
|        | rs11568016 | C/A | Promoter | N | -   | -   | -    | -    | -    | -    | -    | -    | -    |   |
|        | rs11568029 | A/T | IVS      | N | -   | -   | -    | -    | -    | -    | -    | -    | -    |   |
|        | rs2071406  | G/A | Promoter | N | -   | -   | -    | -    | -    | -    | -    | -    | -    |   |
|        | rs2493135  | G/C | Promoter | N | -   | -   | -    | -    | -    | -    | -    | -    | -    |   |
|        | rs5050     | G/T | 5'UTR    | N | -   | -   | -    | -    | -    | -    | -    | -    | -    |   |
|        | rs5051     | C/T | 5'UTR    | N | -   | -   | -    | -    | -    | -    | -    | -    | -    |   |
|        | rs5052     | G/A | 5'UTR    | N | -   | -   | -    | -    | -    | -    | -    | -    | -    |   |
|        | rs699      | G/A | CDS      | N | -   | -   | -    | -    | -    | -    | -    | -    | -    |   |
| AHR    | rs10249788 | C/T | Promoter | Y | 100 | 100 | 0.26 | 0.24 | 0.25 | 0.21 | 0.38 | 0.08 | 0.16 |   |
|        | rs2066853  | A/G | CDS      | N | -   | -   | -    | -    | -    | -    | -    | -    | -    |   |
|        | rs7796976  | G/A | 5'UTR    | N | -   | -   | -    | -    | -    | -    | -    | -    | -    |   |
| AKAP13 | rs11630755 | A/G | IVS      | Y | 99  | 98  | 0.41 | 0.40 | 0.66 | 0.90 | 0.85 | 0.99 | 0.90 |   |
|        | rs16942813 | C/T | IVS      | Y | 97  | 98  | 0.15 | 0.13 | 0.58 | 0.64 | 0.61 | 0.36 | 0.34 |   |
|        | rs8040041  | C/T | IVS      | Y | 98  | 98  | 0.03 | 0.03 | 0.45 | -    | -    | -    | -    |   |
|        | rs1551971  | A/G | IVS      | Y | 100 | 100 | 0.08 | 0.08 | 0.85 | 0.69 | 0.86 | 0.43 | 0.98 |   |
|        | rs2291049  | C/T | IVS      | Y | 99  | 100 | 0.45 | 0.47 | 0.08 | 0.60 | 0.33 | 0.83 | 0.49 |   |
|        | rs410522   | A/C | IVS      | Y | 86  | 85  | 0.28 | 0.25 | 0.00 | -    | -    | -    | -    |   |
|        | rs4843064  | A/G | IVS      | Y | 90  | 91  | 0.03 | 0.02 | 0.56 | -    | -    | -    | -    |   |

|         |            |     |          |   |     |     |      |      |      |      |      |      |      |
|---------|------------|-----|----------|---|-----|-----|------|------|------|------|------|------|------|
|         | rs7178991  | C/G | IVS      | Y | 100 | 100 | 0.21 | 0.19 | 0.30 | 0.50 | 0.91 | 0.33 | 0.44 |
|         | rs2014432  | A/C | Promoter | Y | 100 | 100 | 0.07 | 0.05 | 0.76 | -    | -    | -    | -    |
|         | rs16977252 | A/G | IVS      | Y | 100 | 100 | 0.32 | 0.34 | 0.82 | 0.61 | 0.39 | 0.45 | 0.32 |
|         | rs716400   | G/T | IVS      | Y | 100 | 100 | 0.38 | 0.40 | 0.71 | 0.44 | 0.23 | 0.87 | 0.36 |
|         | rs6496044  | A/G | IVS      | Y | 100 | 100 | 0.48 | 0.49 | 0.31 | 0.43 | 0.84 | 0.30 | 0.62 |
|         | rs1075607  | A/G | IVS      | Y | 100 | 100 | 0.21 | 0.20 | 0.63 | 0.58 | 0.62 | 0.26 | 0.41 |
|         | rs11631739 | C/T | IVS      | Y | 92  | 81  | 0.50 | 0.49 | 0.00 | -    | -    | -    | -    |
|         | rs12437886 | A/G | IVS      | Y | 100 | 100 | 0.50 | 0.49 | 0.99 | 0.66 | 0.52 | 0.95 | 0.71 |
|         | rs12438724 | C/T | Promoter | Y | 97  | 96  | 0.40 | 0.40 | 0.03 | -    | -    | -    | -    |
|         | rs12442591 | A/C | IVS      | Y | 100 | 99  | 0.01 | 0.01 | 0.82 | -    | -    | -    | -    |
|         | rs12912048 | A/G | IVS      | Y | 100 | 100 | 0.38 | 0.41 | 0.92 | 0.25 | 0.13 | 0.77 | 0.24 |
|         | rs16941146 | G/T | Promoter | Y | 100 | 100 | 0.08 | 0.08 | 0.75 | 0.45 | 0.45 | 0.33 | 0.57 |
|         | rs16942440 | C/G | IVS      | Y | 97  | 99  | 0.08 | 0.08 | 0.87 | 0.41 | 0.78 | 0.22 | 0.63 |
|         | rs16945319 | C/G | Promoter | Y | 99  | 100 | 0.11 | 0.11 | 0.99 | 0.71 | 0.97 | 0.49 | 0.53 |
|         | rs16975309 | A/G | Promoter | Y | 100 | 100 | 0.20 | 0.19 | 0.97 | 0.82 | 0.46 | 0.78 | 0.62 |
|         | rs17637142 | C/T | IVS      | Y | 100 | 100 | 0.07 | 0.06 | 0.43 | 0.26 | 0.65 | 0.18 | 0.24 |
|         | rs2169876  | C/T | IVS      | Y | 100 | 100 | 0.15 | 0.12 | 0.07 | 0.05 | 0.01 | 0.93 | 0.02 |
|         | rs2169877  | A/G | IVS      | Y | 100 | 100 | 0.27 | 0.24 | 0.93 | 0.33 | 0.14 | 0.33 | 0.11 |
|         | rs2448023  | C/G | IVS      | Y | 98  | 100 | 0.43 | 0.45 | 0.60 | 0.50 | 0.88 | 0.33 | 0.52 |
|         | rs2467097  | C/T | IVS      | Y | 79  | 87  | 0.10 | 0.10 | 0.19 | -    | -    | -    | -    |
|         | rs338499   | A/G | IVS      | Y | 100 | 100 | 0.05 | 0.05 | 0.79 | -    | -    | -    | -    |
|         | rs338525   | A/G | IVS      | Y | 100 | 100 | 0.01 | 0.01 | 0.77 | -    | -    | -    | -    |
|         | rs338531   | A/T | IVS      | Y | 100 | 100 | 0.05 | 0.05 | 0.60 | 0.58 | 0.98 | 0.86 | 0.94 |
|         | rs431810   | C/T | IVS      | Y | 96  | 98  | 0.34 | 0.34 | 0.95 | 0.89 | 0.96 | 0.69 | 0.88 |
|         | rs7165772  | A/G | IVS      | Y | 100 | 100 | 0.12 | 0.10 | 0.96 | 0.17 | 0.40 | 0.07 | 0.06 |
|         | rs8025135  | A/G | IVS      | Y | 100 | 100 | 0.35 | 0.36 | 0.59 | 0.87 | 0.60 | 0.66 | 0.55 |
|         | rs416916   | G/A | IVS      | N | -   | -   | -    | -    | -    | -    | -    | -    | -    |
| AKAP9   | rs6964587  | G/T | CDS      | Y | 99  | 100 | 0.19 | 0.17 | 0.59 | 0.16 | 0.41 | 0.10 | 0.21 |
|         | rs4727266  | C/T | Promoter | N | -   | -   | -    | -    | -    | -    | -    | -    | -    |
| AKR1A1  | rs9147     | C/T | 5'UTR    | N | -   | -   | -    | -    | -    | -    | -    | -    | -    |
| AKR1B1  | rs5053     | G/C | 5'UTR    | N | -   | -   | -    | -    | -    | -    | -    | -    | -    |
|         | rs759853   | G/A | Promoter | N | -   | -   | -    | -    | -    | -    | -    | -    | -    |
| AKR1B10 | rs10236737 | A/G | Promoter | Y | 99  | 99  | 0.16 | 0.17 | 0.35 | 0.11 | 0.86 | 0.06 | 0.47 |
|         | rs2037004  | A/G | 5'UTR    | Y | 100 | 100 | 0.15 | 0.17 | 0.46 | 0.12 | 0.06 | 0.65 | 0.33 |
|         | rs706184   | C/T | Promoter | N | -   | -   | -    | -    | -    | -    | -    | -    | -    |
|         | rs3735042  | C/T | CDS      | N | -   | -   | -    | -    | -    | -    | -    | -    | -    |
|         | rs782510   | G/T | Promoter | N | -   | -   | -    | -    | -    | -    | -    | -    | -    |
| AKR1C1  | rs8483     | A/G | 3'UTR    | N | -   | -   | -    | -    | -    | -    | -    | -    | -    |
| AKR1C2  | rs1937888  | T/C | Promoter | N | -   | -   | -    | -    | -    | -    | -    | -    | -    |
| AKR1C3  | rs3209896  | A/G | IVS      | Y | 100 | 100 | 0.22 | 0.22 | 0.92 | 0.96 | 0.84 | 0.96 | 0.97 |
|         | rs1937845  | C/T | Promoter | Y | 100 | 100 | 0.11 | 0.12 | 0.81 | 0.84 | 0.62 | 0.70 | 0.72 |
| AKT2    | rs10416620 | C/G | Promoter | Y | 93  | 91  | 0.11 | 0.14 | 0.02 | -    | -    | -    | -    |





|         |            |     |          |   |     |     |      |      |      |      |      |      |      |   |
|---------|------------|-----|----------|---|-----|-----|------|------|------|------|------|------|------|---|
| ASPSCR1 | rs34085048 | A/G | CDS      | N | -   | -   | -    | -    | -    | -    | -    | -    | -    | - |
|         | rs8074498  | A/T | CDS      | N | -   | -   | -    | -    | -    | -    | -    | -    | -    | - |
|         | rs35344256 | A/C | Promoter | Y | 100 | 100 | 0.48 | 0.49 | 0.97 | 0.10 | 0.04 | 0.75 | 0.14 |   |
| ATF1    | rs3809319  | A/G | IVS      | Y | 100 | 99  | 0.34 | 0.35 | 0.60 | 0.75 | 0.61 | 0.55 | 0.50 |   |
| ATF3    | rs8192658  | C/T | CDS      | N | -   | -   | -    | -    | -    | -    | -    | -    | -    |   |
| ATF4    | rs2267413  | A/G | Promoter | Y | 94  | 98  | 0.01 | 0.01 | 0.80 | -    | -    | -    | -    |   |
|         | rs4894     | A/C | CDS      | N | -   | -   | -    | -    | -    | -    | -    | -    | -    |   |
| ATIC    | rs2372536  | C/G | CDS      | Y | 100 | 100 | 0.20 | 0.19 | 0.32 | 0.81 | 0.80 | 0.49 | 0.66 |   |
|         | rs28366034 | C/T | 5'UTR    | N | -   | -   | -    | -    | -    | -    | -    | -    | -    |   |
| ATP5O   | rs4591     | C/T | IVS      | Y | 98  | 98  | 0.30 | 0.30 | 0.05 | 0.15 | 0.43 | 0.19 | 0.96 |   |
|         | rs2834296  | G/A | CDS      | N | -   | -   | -    | -    | -    | -    | -    | -    | -    |   |
| AXL     | rs2301236  | A/G | Promoter | Y | 98  | 100 | 0.25 | 0.22 | 0.18 | 0.32 | 0.29 | 0.14 | 0.11 |   |
|         | rs28364580 | A/G | 5'UTR    | Y | 99  | 100 | 0.20 | 0.20 | 0.90 | 0.61 | 0.32 | 0.93 | 0.66 |   |
|         | rs8101017  | G/T | Promoter | Y | 98  | 98  | 0.20 | 0.21 | 0.58 | 0.82 | 0.72 | 0.67 | 0.88 |   |
| BARD1   | rs2229571  | C/G | CDS      | Y | 92  | 90  | 0.34 | 0.33 | 0.02 | -    | -    | -    | -    |   |
|         | rs3738885  | G/C | CDS      | N | -   | -   | -    | -    | -    | -    | -    | -    | -    |   |
|         | rs1048108  | G/A | CDS      | N | -   | -   | -    | -    | -    | -    | -    | -    | -    |   |
|         | rs1129804  | C/G | 5'UTR    | N | -   | -   | -    | -    | -    | -    | -    | -    | -    |   |
|         | rs17489363 | G/A | 5'UTR    | N | -   | -   | -    | -    | -    | -    | -    | -    | -    |   |
|         | rs2070094  | T/C | CDS      | N | -   | -   | -    | -    | -    | -    | -    | -    | -    |   |
|         | rs3738888  | G/A | CDS      | N | -   | -   | -    | -    | -    | -    | -    | -    | -    |   |
| BCL11A  | None       | -   | -        | - | -   | -   | -    | -    | -    | -    | -    | -    |      |   |
| BCL3    | rs1046881  | T/A | 3'UTR    | N | -   | -   | -    | -    | -    | -    | -    | -    | -    |   |
| BCL6    | rs16862537 | A/G | Promoter | Y | 100 | 100 | 0.26 | 0.23 | 0.75 | 0.05 | 0.37 | 0.04 | 0.12 |   |
|         | rs2229362  | A/G | CDS      | Y | 100 | 100 | 0.10 | 0.11 | 0.55 | 0.54 | 0.81 | 0.39 | 0.46 |   |
| BCL7A   | rs1678962  | A/T | 5'UTR    | N | -   | -   | -    | -    | -    | -    | -    | -    | -    |   |
| BCL9    | rs34002844 | C/T | CDS      | Y | 0   | 0   | -    | -    | -    | -    | -    | -    | -    |   |
|         | rs3806218  | A/G | Promoter | Y | 99  | 100 | 0.34 | 0.34 | 0.87 | 0.81 | 0.83 | 0.52 | 0.71 |   |
|         | rs3820129  | T/C | CDS      | N | -   | -   | -    | -    | -    | -    | -    | -    | -    |   |
|         | rs867270   | A/G | 3'UTR    | Y | 98  | 96  | 0.34 | 0.35 | 0.72 | 0.10 | 0.12 | 0.37 | 0.97 |   |
| BCR     | rs3761418  | A/G | Promoter | Y | 0   | 0   | -    | -    | -    | -    | -    | -    | -    |   |
|         | rs140504   | A/G | CDS      | N | -   | -   | -    | -    | -    | -    | -    | -    | -    |   |
|         | rs180812   | A/G | 3'UTR    | N | -   | -   | -    | -    | -    | -    | -    | -    | -    |   |
|         | rs34596599 | A/G | CDS      | N | -   | -   | -    | -    | -    | -    | -    | -    | -    |   |
|         | rs35812689 | C/T | CDS      | N | -   | -   | -    | -    | -    | -    | -    | -    | -    |   |
| BHLHB2  | rs1110261  | G/A | Promoter | N | -   | -   | -    | -    | -    | -    | -    | -    | -    |   |
|         | rs2271566  | C/T | 5'UTR    | N | -   | -   | -    | -    | -    | -    | -    | -    | -    |   |
| BLM     | rs2238335  | C/G | IVS      | Y | 100 | 100 | 0.10 | 0.09 | 0.25 | 0.90 | 0.74 | 0.77 | 0.73 |   |
| BLMH    | rs1050565  | A/G | CDS      | Y | 100 | 100 | 0.16 | 0.16 | 0.68 | 0.84 | 0.80 | 0.68 | 0.73 |   |
| BRD4    | None       | -   | -        | - | -   | -   | -    | -    | -    | -    | -    | -    | -    |   |
| BSG     | rs8637     | G/A | 3'UTR    | N | -   | -   | -    | -    | -    | -    | -    | -    | -    |   |
| BTK     | rs2071229  | C/T | Promoter | Y | 88  | 89  | 0.09 | 0.09 | 0.00 | -    | -    | -    | -    |   |





|        |            |     |          |   |     |     |      |      |      |       |       |       |       |   |
|--------|------------|-----|----------|---|-----|-----|------|------|------|-------|-------|-------|-------|---|
|        | rs7610     | G/A | 3'UTR    | N | -   | -   | -    | -    | -    | -     | -     | -     | -     | - |
|        | rs9658655  | C/G | CDS      | Y | 83  | 90  | 0.22 | 0.19 | 0.14 | -     | -     | -     | -     | - |
| CHN1   | rs3732315  | A/T | Promoter | Y | 99  | 99  | 0.32 | 0.31 | 0.44 | 0.86  | 0.58  | 0.77  | 0.59  |   |
| CIITA  | rs2071170  | C/G | Promoter | Y | 100 | 99  | 0.33 | 0.34 | 0.12 | 0.83  | 0.76  | 0.89  | 0.98  |   |
|        | rs2229317  | C/G | CDS      | Y | 100 | 100 | 0.37 | 0.36 | 0.07 | 0.38  | 0.95  | 0.26  | 0.61  |   |
|        | rs4774     | C/G | CDS      | N | -   | -   | -    | -    | -    | -     | -     | -     | -     |   |
|        | rs13336804 | C/T | CDS      | N | -   | -   | -    | -    | -    | -     | -     | -     | -     |   |
| CKMT1B | rs2439     | C/T | 3'UTR    | N | -   | -   | -    | -    | -    | -     | -     | -     | -     |   |
| CLK1   | rs12465952 | A/G | 3'UTR    | Y | 100 | 100 | 0.25 | 0.25 | 0.88 | 0.55  | 0.51  | 0.52  | 0.79  |   |
| CLTC   | rs3803861  | G/A | Promoter | N | -   | -   | -    | -    | -    | -     | -     | -     | -     |   |
|        | rs3803862  | G/A | Promoter | N | -   | -   | -    | -    | -    | -     | -     | -     | -     |   |
| CLTCL1 | rs5746697  | C/T | CDS      | Y | 100 | 100 | 0.06 | 0.05 | 0.26 | 0.10  | 0.97  | 0.29  | 0.47  |   |
|        | rs735369   | C/G | Promoter | Y | 98  | 96  | 0.34 | 0.32 | 0.77 | 0.31  | 0.32  | 0.15  | 0.16  |   |
|        | rs738904   | A/C | 3'UTR    | Y | 0   | 0   | -    | -    | -    | -     | -     | -     | -     |   |
| COL6A3 | rs1131296  | G/A | CDS      | N | -   | -   | -    | -    | -    | -     | -     | -     | -     |   |
|        | rs4663722  | C/G | IVS      | Y | 100 | 100 | 0.17 | 0.16 | 0.34 | 0.40  | 0.29  | 0.69  | 0.43  |   |
|        | rs2270669  | C/G | CDS      | Y | 100 | 100 | 0.28 | 0.29 | 0.51 | 0.83  | 0.82  | 0.66  | 0.72  |   |
|        | rs35848091 | G/T | CDS      | Y | 0   | 0   | -    | -    | -    | -     | -     | -     | -     |   |
|        | rs36117715 | A/G | CDS      | Y | 100 | 100 | 0.00 | 0.00 | 0.95 | -     | -     | -     | -     |   |
|        | rs6728818  | A/G | CDS      | Y | 97  | 94  | 0.43 | 0.44 | 0.72 | -     | -     | -     | -     |   |
| COX6C  | rs1130474  | A/G | IVS      | Y | 100 | 100 | 0.11 | 0.13 | 0.63 | 0.27  | 0.10  | 0.33  | 0.08  |   |
|        | rs4518636  | T/C | 5'UTR    | N | -   | -   | -    | -    | -    | -     | -     | -     | -     |   |
| COX7A2 | rs240423   | C/T | Promoter | Y | 100 | 100 | 0.15 | 0.14 | 0.92 | 0.72  | 0.57  | 0.50  | 0.48  |   |
|        | rs9360898  | G/T | Promoter | Y | 100 | 100 | 0.21 | 0.22 | 0.88 | 0.69  | 0.93  | 0.45  | 0.51  |   |
| CRAT   | rs2229419  | G/A | 3'UTR    | N | -   | -   | -    | -    | -    | -     | -     | -     | -     |   |
|        | rs17459086 | C/G | CDS      | Y | 99  | 99  | 0.07 | 0.07 | 0.33 | 0.48  | 0.71  | 0.26  | 0.92  |   |
| CREM   | rs10827493 | C/T | Promoter | Y | 99  | 100 | 0.26 | 0.26 | 0.21 | 0.76  | 0.79  | 0.36  | 0.57  |   |
|        | rs17499811 | A/G | Promoter | Y | 87  | 91  | 0.26 | 0.27 | 0.04 | -     | -     | -     | -     |   |
| CRHR1  | rs16940681 | G/C | 3'UTR    | N | -   | -   | -    | -    | -    | -     | -     | -     | -     |   |
| CRTC1  | rs3746266  | T/C | CDS      | Y | 98  | 96  | 0.23 | 0.17 | 0.50 | 0.003 | 0.002 | 0.11  | 0.001 |   |
|        | rs36070283 | A/G | CDS      | N | -   | -   | -    | -    | -    | -     | -     | -     | -     |   |
| CSF1R  | rs2066933  | G/A | 3'UTR    | N | -   | -   | -    | -    | -    | -     | -     | -     | -     |   |
|        | rs2066934  | C/A | 3'UTR    | N | -   | -   | -    | -    | -    | -     | -     | -     | -     |   |
|        | rs10079250 | A/G | CDS      | Y | 100 | 100 | 0.31 | 0.30 | 0.11 | 0.11  | 0.20  | 0.25  | 0.76  |   |
|        | rs2236777  | C/T | Promoter | Y | 100 | 100 | 0.28 | 0.31 | 0.61 | 0.27  | 0.32  | 0.14  | 0.16  |   |
| CSK    | rs12898997 | C/T | IVS      | N | -   | -   | -    | -    | -    | -     | -     | -     | -     |   |
| CSNK1E | rs1997644  | G/A | Promoter | N | -   | -   | -    | -    | -    | -     | -     | -     | -     |   |
| CTPS   | rs2897231  | A/G | Promoter | N | -   | -   | -    | -    | -    | -     | -     | -     | -     |   |
|        | rs12729920 | A/G | Promoter | Y | 0   | 0   | -    | -    | -    | -     | -     | -     | -     |   |
| CTSC   | rs12573983 | A/G | Promoter | Y | 100 | 100 | 0.10 | 0.12 | 0.34 | 0.14  | 0.20  | 0.09  | 0.11  |   |
|        | rs3758833  | T/C | Promoter | Y | 100 | 100 | 0.48 | 0.48 | 0.13 | 0.02  | 0.49  | 0.003 | 0.03  |   |
|        | rs662983   | C/T | Promoter | Y | 99  | 98  | 0.16 | 0.18 | 0.82 | 0.21  | 0.09  | 0.26  | 0.06  |   |











|        |            |     |          |   |     |     |      |      |      |      |      |      |      |
|--------|------------|-----|----------|---|-----|-----|------|------|------|------|------|------|------|
| FUS    | rs3764326  | C/T | Promoter | Y | 100 | 99  | 0.13 | 0.14 | 0.78 | 0.73 | 0.64 | 0.52 | 0.48 |
| FZD5   | rs35994626 | A/G | CDS      | N | -   | -   | -    | -    | -    | -    | -    | -    | -    |
| FZD6   | rs3808553  | G/T | CDS      | Y | 100 | 100 | 0.40 | 0.37 | 0.68 | 0.30 | 0.43 | 0.12 | 0.17 |
| FZD7   | rs34908164 | A/G | CDS      | N | -   | -   | -    | -    | -    | -    | -    | -    | -    |
| FZD9   | rs1178947  | G/A | 3'UTR    | N | -   | -   | -    | -    | -    | -    | -    | -    | -    |
| GAS6   | rs7320583  | C/T | IVS      | N | -   | -   | -    | -    | -    | -    | -    | -    | -    |
|        | rs8191974  | A/G | Promoter | N | -   | -   | -    | -    | -    | -    | -    | -    | -    |
|        | rs9577924  | C/T | 5'UTR    | Y | 100 | 100 | 0.25 | 0.23 | 0.41 | 0.58 | 0.29 | 0.55 | 0.37 |
| GAS7   | None       | -   | -        | - | -   | -   | -    | -    | -    | -    | -    | -    | -    |
|        | rs17208387 | A/G | 5'UTR    | Y | 100 | 100 | 0.10 | 0.11 | 0.97 | 0.66 | 0.31 | 0.87 | 0.70 |
| GCAT   | rs13911    | A/G | 3'UTR    | Y | 100 | 100 | 0.13 | 0.11 | 0.07 | 0.23 | 0.89 | 0.08 | 0.12 |
| GCG    | rs13001107 | C/G | Promoter | Y | 99  | 99  | 0.21 | 0.22 | 0.62 | 0.68 | 0.44 | 0.59 | 0.87 |
| GDF15  | rs8101804  | C/T | Promoter | N | -   | -   | -    | -    | -    | -    | -    | -    | -    |
|        | rs1059369  | T/A | CDS      | N | -   | -   | -    | -    | -    | -    | -    | -    | -    |
|        | rs1227733  | G/A | 3'UTR    | N | -   | -   | -    | -    | -    | -    | -    | -    | -    |
|        | rs1054564  | C/G | 3'UTR    | Y | 100 | 100 | 0.20 | 0.18 | 0.71 | 0.50 | 0.80 | 0.28 | 0.31 |
| GEM    | rs2170363  | C/G | CDS      | N | -   | -   | -    | -    | -    | -    | -    | -    | -    |
|        | rs2250208  | C/T | 5'UTR    | Y | 100 | 100 | 0.24 | 0.25 | 0.52 | 0.18 | 0.29 | 0.32 | 0.70 |
| GGH    | rs11545077 | A/G | IVS      | Y | 94  | 95  | 0.21 | 0.19 | 0.21 | -    | -    | -    | -    |
|        | rs11545078 | C/T | CDS      | Y | 100 | 100 | 0.08 | 0.07 | 0.13 | 0.43 | 0.24 | 0.86 | 0.30 |
|        | rs2305558  | A/G | IVS      | Y | 100 | 100 | 0.36 | 0.35 | 0.63 | 0.32 | 0.18 | 0.71 | 0.70 |
|        | rs1800909  | G/A | CDS      | N | -   | -   | -    | -    | -    | -    | -    | -    | -    |
|        | rs3758147  | G/A | Promoter | N | -   | -   | -    | -    | -    | -    | -    | -    | -    |
|        | rs3758149  | G/A | Promoter | N | -   | -   | -    | -    | -    | -    | -    | -    | -    |
|        | rs719235   | C/A | Promoter | N | -   | -   | -    | -    | -    | -    | -    | -    | -    |
|        | rs11545076 | C/A | 5'UTR    | N | -   | -   | -    | -    | -    | -    | -    | -    | -    |
|        | rs2736681  | C/A | Promoter | N | -   | -   | -    | -    | -    | -    | -    | -    | -    |
|        | rs13270305 | C/T | CDS      | N | -   | -   | -    | -    | -    | -    | -    | -    | -    |
| GNB2   | None       | -   | -        | - | -   | -   | -    | -    | -    | -    | -    | -    | -    |
| GNB2L1 | rs1279736  | C/A | Promoter | Y | 98  | 98  | 0.34 | 0.31 | 0.90 | 0.42 | 0.43 | 0.19 | 0.18 |
|        | rs3756585  | G/T | Promoter | Y | 100 | 100 | 0.30 | 0.30 | 0.82 | 0.99 | 0.91 | 0.91 | 0.89 |
| GOLGA5 | rs3759719  | G/A | Promoter | N | -   | -   | -    | -    | -    | -    | -    | -    | -    |
|        | rs17128572 | C/G | CDS      | Y | 99  | 99  | 0.18 | 0.17 | 0.44 | 0.78 | 0.52 | 0.77 | 0.52 |
| GOPC   | rs3752848  | G/A | 5'UTR    | N | -   | -   | -    | -    | -    | -    | -    | -    | -    |
|        | rs3752847  | C/A | 5'UTR    | N | -   | -   | -    | -    | -    | -    | -    | -    | -    |
| GPC3   | rs2267531  | C/G | Promoter | Y | 96  | 89  | 0.41 | 0.35 | 0.00 | -    | -    | -    | -    |
| GPHN   | rs928553   | G/A | 5'UTR    | N | -   | -   | -    | -    | -    | -    | -    | -    | -    |
|        | rs7160519  | C/T | Promoter | Y | 100 | 100 | 0.46 | 0.46 | 0.05 | -    | -    | -    | -    |
| GPR39  | rs2241764  | G/A | CDS      | Y | 100 | 100 | 0.25 | 0.22 | 0.68 | 0.10 | 0.56 | 0.03 | 0.04 |
| GPX1   | rs1800668  | C/T | 5'UTR    | Y | 100 | 100 | 0.08 | 0.07 | 0.10 | 0.44 | 0.63 | 0.34 | 0.82 |
|        | rs1050450  | G/A | CDS      | N | -   | -   | -    | -    | -    | -    | -    | -    | -    |
| GPX3   | rs8177404  | C/T | Promoter | Y | 100 | 99  | 0.17 | 0.16 | 0.66 | 0.34 | 0.14 | 0.51 | 0.29 |

|       |            |     |          |   |     |     |      |      |      |      |      |      |      |   |
|-------|------------|-----|----------|---|-----|-----|------|------|------|------|------|------|------|---|
|       | rs11548    | C/T | 3'UTR    | N | -   | -   | -    | -    | -    | -    | -    | -    | -    | - |
|       | rs1946234  | A/C | Promoter | N | -   | -   | -    | -    | -    | -    | -    | -    | -    | - |
|       | rs1946235  | C/A | Promoter | N | -   | -   | -    | -    | -    | -    | -    | -    | -    | - |
|       | rs1946236  | A/T | Promoter | N | -   | -   | -    | -    | -    | -    | -    | -    | -    | - |
|       | rs8177409  | T/A | Promoter | N | -   | -   | -    | -    | -    | -    | -    | -    | -    | - |
|       | rs8177412  | C/T | 5'UTR    | N | -   | -   | -    | -    | -    | -    | -    | -    | -    | - |
| GPX4  | rs8103188  | A/G | Promoter | N | -   | -   | -    | -    | -    | -    | -    | -    | -    | - |
| GPX7  | rs6588431  | C/T | Promoter | Y | 100 | 100 | 0.17 | 0.20 | 0.48 | 0.07 | 0.03 | 0.85 | 0.06 |   |
| GSK3A | rs3810149  | C/G | Promoter | Y | 99  | 99  | 0.12 | 0.10 | 0.34 | 0.21 | 0.21 | 0.10 | 0.12 |   |
| GSPT1 | rs2075151  | C/A | 5'UTR    | N | -   | -   | -    | -    | -    | -    | -    | -    | -    | - |
|       | rs434762   | G/A | IVS      | N | -   | -   | -    | -    | -    | -    | -    | -    | -    | - |
| GSTA1 | rs3756985  | A/G | Promoter | Y | 100 | 100 | 0.00 | 0.00 | -    | -    | -    | -    | -    | - |
|       | rs1052004  | G/A | 3'UTR    | N | -   | -   | -    | -    | -    | -    | -    | -    | -    | - |
|       | rs1052027  | G/A | 3'UTR    | N | -   | -   | -    | -    | -    | -    | -    | -    | -    | - |
|       | rs3957357  | A/G | Promoter | N | -   | -   | -    | -    | -    | -    | -    | -    | -    | - |
|       | rs699336   | T/A | 3'UTR    | N | -   | -   | -    | -    | -    | -    | -    | -    | -    | - |
| GSTA2 | rs2180314  | C/G | CDS      | N | -   | -   | -    | -    | -    | -    | -    | -    | -    | - |
|       | rs4715316  | C/T | Promoter | N | -   | -   | -    | -    | -    | -    | -    | -    | -    | - |
|       | rs6577     | T/G | CDS      | N | -   | -   | -    | -    | -    | -    | -    | -    | -    | - |
|       | rs4715317  | G/T | Promoter | N | -   | -   | -    | -    | -    | -    | -    | -    | -    | - |
| GSTM3 | rs4970777  | C/T | Promoter | Y | 100 | 100 | 0.17 | 0.17 | 0.19 | 0.44 | 0.29 | 0.61 | 0.92 |   |
|       | rs7483     | A/G | CDS      | Y | 100 | 100 | 0.24 | 0.23 | 0.03 | -    | -    | -    | -    | - |
|       | rs1332018  | G/T | 5'UTR    | N | -   | -   | -    | -    | -    | -    | -    | -    | -    | - |
| GSTM4 | rs638007   | A/T | Promoter | Y | 100 | 100 | 0.23 | 0.24 | 0.37 | 0.64 | 0.51 | 0.85 | 0.92 |   |
|       | rs641592   | C/T | Promoter | Y | 100 | 100 | 0.23 | 0.24 | 0.38 | 0.48 | 0.87 | 0.36 | 0.83 |   |
|       | rs1010167  | G/C | 5'UTR    | N | -   | -   | -    | -    | -    | -    | -    | -    | -    | - |
| GSTO2 | rs156697   | C/T | CDS      | Y | 100 | 100 | 0.25 | 0.22 | 0.36 | 0.39 | 0.45 | 0.22 | 0.20 |   |
|       | rs2297235  | A/G | 5'UTR    | Y | 95  | 98  | 0.15 | 0.13 | 0.41 | -    | -    | -    | -    | - |
|       | rs157077   | T/C | IVS      | N | -   | -   | -    | -    | -    | -    | -    | -    | -    | - |
|       | rs641071   | A/C | Promoter | N | -   | -   | -    | -    | -    | -    | -    | -    | -    | - |
| GSTT2 | None       | -   | -        | - | -   | -   | -    | -    | -    | -    | -    | -    | -    | - |
| GTF2I | rs1057896  | G/T | CDS      | N | -   | -   | -    | -    | -    | -    | -    | -    | -    | - |
| GUSB  | rs9530     | C/T | CDS      | Y | 100 | 100 | 0.09 | 0.12 | 0.15 | 0.01 | 0.01 | 0.85 | 0.01 |   |
| H2AFZ | rs17029673 | C/T | Promoter | Y | 100 | 100 | 0.27 | 0.26 | 0.48 | 0.81 | 0.49 | 0.70 | 0.56 |   |
| HADHA | rs13016300 | C/G | Promoter | N | -   | -   | -    | -    | -    | -    | -    | -    | -    | - |
|       | rs35615763 | C/G | Promoter | Y | 100 | 100 | 0.13 | 0.14 | 0.77 | 0.49 | 0.57 | 0.23 | 0.40 |   |
| HAGH  | rs104843   | C/A | IVS      | N | -   | -   | -    | -    | -    | -    | -    | -    | -    | - |
| HDHD1 | rs12689910 | C/T | CDS      | N | -   | -   | -    | -    | -    | -    | -    | -    | -    | - |
| HEI10 | rs1132644  | A/C | 5'UTR    | N | -   | -   | -    | -    | -    | -    | -    | -    | -    | - |
|       | rs7155699  | A/C | 5'UTR    | Y | 100 | 100 | 0.17 | 0.15 | 0.19 | 0.30 | 0.42 | 0.11 | 0.10 |   |
| HIP1  | rs4385415  | A/G | Promoter | Y | 99  | 97  | 0.25 | 0.24 | 0.66 | 0.49 | 0.27 | 0.88 | 0.33 |   |
|       | rs4385416  | A/G | Promoter | Y | 100 | 100 | 0.25 | 0.24 | 0.71 | 0.59 | 0.35 | 0.79 | 0.38 |   |







|           |            |     |          |   |     |     |      |      |      |      |      |      |      |   |
|-----------|------------|-----|----------|---|-----|-----|------|------|------|------|------|------|------|---|
| KLK10     | rs10413539 | A/G | Promoter | N | -   | -   | -    | -    | -    | -    | -    | -    | -    | - |
|           | rs3760738  | G/A | Promoter | N | -   | -   | -    | -    | -    | -    | -    | -    | -    | - |
|           | rs3745535  | A/C | CDS      | N | -   | -   | -    | -    | -    | -    | -    | -    | -    | - |
|           | rs2075690  | G/A | CDS      | N | -   | -   | -    | -    | -    | -    | -    | -    | -    | - |
|           | rs2569454  | C/T | 5'UTR    | Y | 90  | 94  | 0.39 | 0.36 | 0.03 | -    | -    | -    | -    | - |
|           | rs7259651  | A/G | 5'UTR    | Y | 94  | 97  | 0.33 | 0.37 | 0.91 | -    | -    | -    | -    | - |
| KRT2      | rs17117549 | G/A | Promoter | N | -   | -   | -    | -    | -    | -    | -    | -    | -    | - |
|           | rs10876315 | A/G | Promoter | N | -   | -   | -    | -    | -    | -    | -    | -    | -    | - |
|           | rs4258426  | C/T | Promoter | N | -   | -   | -    | -    | -    | -    | -    | -    | -    | - |
| KRTAP10-4 | rs2634041  | C/T | CDS      | Y | 95  | 95  | 0.22 | 0.21 | 0.90 | -    | -    | -    | -    | - |
|           | rs233283   | C/T | IVS      | N | -   | -   | -    | -    | -    | -    | -    | -    | -    | - |
|           | rs425667   | C/T | IVS      | N | -   | -   | -    | -    | -    | -    | -    | -    | -    | - |
|           | rs460166   | G/A | IVS      | N | -   | -   | -    | -    | -    | -    | -    | -    | -    | - |
|           | rs382478   | C/G | IVS      | N | -   | -   | -    | -    | -    | -    | -    | -    | -    | - |
|           | rs233280   | A/G | Promoter | Y | 96  | 97  | 0.20 | 0.20 | 0.46 | 0.49 | 0.27 | 0.88 | 0.80 | - |
|           | rs458762   | A/G | Promoter | Y | 100 | 100 | 0.30 | 0.31 | 0.02 | -    | -    | -    | -    | - |
| KTN1      | rs10146870 | C/G | Promoter | Y | 99  | 100 | 0.36 | 0.36 | 0.47 | 0.42 | 0.40 | 0.48 | 0.93 | - |
|           | rs12589867 | G/T | Promoter | Y | 100 | 99  | 0.31 | 0.33 | 0.11 | 0.28 | 0.23 | 0.58 | 0.51 | - |
| LAF4      | rs1047265  | T/C | CDS      | N | -   | -   | -    | -    | -    | -    | -    | -    | -    | - |
| LAMB1     | rs7561     | C/A | 3'UTR    | N | -   | -   | -    | -    | -    | -    | -    | -    | -    | - |
|           | rs2070917  | G/A | 5'UTR    | N | -   | -   | -    | -    | -    | -    | -    | -    | -    | - |
|           | rs20556    | A/G | IVS      | Y | 100 | 100 | 0.17 | 0.16 | 0.57 | 0.64 | 0.40 | 0.53 | 0.42 | - |
|           | rs6965420  | G/T | Promoter | Y | 100 | 100 | 0.02 | 0.02 | 0.13 | -    | -    | -    | -    | - |
|           | rs4730283  | A/G | CDS      | N | -   | -   | -    | -    | -    | -    | -    | -    | -    | - |
| LAMP2     | rs42889    | C/A | 3'UTR    | N | -   | -   | -    | -    | -    | -    | -    | -    | -    | - |
| LCP1      | rs2296118  | A/G | 5'UTR    | Y | 100 | 100 | 0.10 | 0.11 | 0.42 | 0.44 | 0.22 | 0.48 | 0.19 | - |
|           | rs3759483  | C/G | Promoter | Y | 100 | 100 | 0.22 | 0.18 | 1.00 | 0.04 | 0.02 | 0.15 | 0.02 | - |
|           | rs3759486  | C/G | Promoter | Y | 100 | 100 | 0.05 | 0.05 | 0.10 | -    | -    | -    | -    | - |
| LCT       | rs1042712  | C/G | 3'UTR    | Y | 100 | 100 | 0.17 | 0.18 | 0.34 | 0.60 | 0.33 | 0.90 | 0.41 | - |
|           | rs2322659  | C/T | CDS      | N | -   | -   | -    | -    | -    | -    | -    | -    | -    | - |
| LDHA      | rs4757650  | C/T | Promoter | Y | 99  | 100 | 0.08 | 0.08 | 0.34 | 0.77 | 0.55 | 0.50 | 0.47 | - |
|           | rs7128549  | C/G | Promoter | Y | 99  | 99  | 0.32 | 0.34 | 0.46 | 0.33 | 0.74 | 0.14 | 0.35 | - |
|           | rs7129689  | C/T | Promoter | Y | 100 | 99  | 0.36 | 0.37 | 0.70 | 0.58 | 0.32 | 0.63 | 0.40 | - |
| LHFP      | rs912046   | C/T | 5'UTR    | N | -   | -   | -    | -    | -    | -    | -    | -    | -    | - |
|           | rs3764071  | G/T | Promoter | Y | 89  | 86  | 0.07 | 0.06 | 0.54 | -    | -    | -    | -    | - |
| LIPJ      | rs17109503 | C/G | IVS      | N | -   | -   | -    | -    | -    | -    | -    | -    | -    | - |
| LITAF     | rs17523609 | G/A | Promoter | N | -   | -   | -    | -    | -    | -    | -    | -    | -    | - |
|           | rs17523623 | G/C | Promoter | N | -   | -   | -    | -    | -    | -    | -    | -    | -    | - |
|           | rs12923640 | A/G | Promoter | Y | 100 | 100 | 0.21 | 0.19 | 0.99 | 0.27 | 0.20 | 0.33 | 0.15 | - |
|           | rs6498222  | C/T | IVS      | Y | 100 | 100 | 0.40 | 0.41 | 0.99 | 0.68 | 0.38 | 0.98 | 0.65 | - |
|           | rs4280262  | A/G | CDS      | Y | 100 | 100 | 0.08 | 0.10 | 0.63 | 0.17 | 0.25 | 0.11 | 0.15 | - |
| LMO1      | rs2071458  | G/T | 5'UTR    | Y | 97  | 94  | 0.25 | 0.25 | 0.01 | -    | -    | -    | -    | - |

|        |            |     |          |   |     |     |      |      |      |      |      |      |      |
|--------|------------|-----|----------|---|-----|-----|------|------|------|------|------|------|------|
| LMO2   | rs3740616  | A/T | IVS      | Y | 94  | 93  | 0.14 | 0.14 | 0.37 | -    | -    | -    | -    |
|        | rs2273799  | C/T | 5'UTR    | Y | 100 | 100 | 0.37 | 0.39 | 0.91 | 0.50 | 0.39 | 0.29 | 0.25 |
| LOX    | rs1800449  | A/G | Promoter | N | -   | -   | -    | -    | -    | -    | -    | -    | -    |
| LPP    | rs1842306  | A/G | Promoter | Y | 100 | 99  | 0.43 | 0.49 | 0.01 | -    | -    | -    | -    |
|        | rs3732911  | A/C | IVS      | Y | 80  | 89  | 0.21 | 0.23 | 0.21 | -    | -    | -    | -    |
| LRPAP1 | rs35417432 | C/T | CDS      | Y | 0   | 0   | -    | -    | -    | -    | -    | -    | -    |
|        | rs1741542  | G/A | Promoter | N | -   | -   | -    | -    | -    | -    | -    | -    | -    |
|        | rs10012014 | G/C | Promoter | N | -   | -   | -    | -    | -    | -    | -    | -    | -    |
|        | rs6789     | G/A | 3'UTR    | N | -   | -   | -    | -    | -    | -    | -    | -    | -    |
|        | rs1800493  | T/C | CDS      | N | -   | -   | -    | -    | -    | -    | -    | -    | -    |
| LTF    | rs4637321  | A/G | Promoter | N | -   | -   | -    | -    | -    | -    | -    | -    | -    |
|        | rs1126477  | A/G | CDS      | Y | 98  | 97  | 0.43 | 0.39 | 0.30 | 0.10 | 0.42 | 0.03 | 0.05 |
|        | rs1126478  | A/G | CDS      | Y | 99  | 98  | 0.35 | 0.37 | 0.97 | 0.47 | 0.83 | 0.26 | 0.36 |
|        | rs2073495  | C/G | CDS      | Y | 100 | 100 | 0.30 | 0.30 | 0.19 | 0.25 | 0.80 | 0.08 | 0.56 |
| LYN    | rs1050855  | G/A | 5'UTR    | N | -   | -   | -    | -    | -    | -    | -    | -    | -    |
|        | rs1450741  | C/T | Promoter | Y | 93  | 89  | 0.20 | 0.22 | 0.42 | -    | -    | -    | -    |
|        | rs2271400  | A/G | Promoter | Y | 92  | 88  | 0.19 | 0.22 | 0.87 | -    | -    | -    | -    |
| LZTR1  | rs13056784 | A/T | Promoter | N | -   | -   | -    | -    | -    | -    | -    | -    | -    |
|        | rs178278   | A/C | Promoter | Y | 99  | 100 | 0.42 | 0.43 | 0.49 | 0.81 | 0.92 | 0.63 | 0.74 |
|        | rs6005114  | A/C | Promoter | Y | 97  | 98  | 0.12 | 0.14 | 0.47 | 0.25 | 0.15 | 0.80 | 0.21 |
| M6PR   | rs1558525  | A/G | 3'UTR    | N | -   | -   | -    | -    | -    | -    | -    | -    | -    |
|        | rs10842598 | A/C | Promoter | Y | 0   | 0   | -    | -    | -    | -    | -    | -    | -    |
|        | rs4140911  | A/G | IVS      | Y | 100 | 100 | 0.04 | 0.04 | 0.30 | -    | -    | -    | -    |
|        | rs987917   | A/C | Promoter | Y | 98  | 98  | 0.49 | 0.49 | 0.04 | -    | -    | -    | -    |
| MAF    | rs2288065  | A/G | Promoter | N | -   | -   | -    | -    | -    | -    | -    | -    | -    |
|        | rs2288066  | C/A | 5'UTR    | N | -   | -   | -    | -    | -    | -    | -    | -    | -    |
| MALT1  | rs12458537 | G/T | Promoter | Y | 100 | 100 | 0.14 | 0.14 | 0.57 | 0.95 | 0.72 | 0.86 | 0.80 |
| MAP2K2 | rs6629     | G/A | 3'UTR    | N | -   | -   | -    | -    | -    | -    | -    | -    | -    |
| MAP2K4 | rs3809728  | T/A | Promoter | N | -   | -   | -    | -    | -    | -    | -    | -    | -    |
|        | rs2190853  | C/G | Promoter | Y | 99  | 97  | 0.17 | 0.17 | 0.65 | 0.90 | 0.92 | 0.51 | 0.92 |
|        | rs3826392  | A/C | Promoter | Y | 100 | 100 | 0.17 | 0.17 | 0.52 | 0.93 | 0.96 | 0.53 | 0.89 |
| MAP3K8 | rs9338188  | G/C | Promoter | N | -   | -   | -    | -    | -    | -    | -    | -    | -    |
|        | rs306587   | C/G | 5'UTR    | N | -   | -   | -    | -    | -    | -    | -    | -    | -    |
|        | rs3751450  | A/G | 5'UTR    | N | -   | -   | -    | -    | -    | -    | -    | -    | -    |
|        | rs7475723  | G/T | Promoter | N | -   | -   | -    | -    | -    | -    | -    | -    | -    |
|        | rs8176945  | G/T | Promoter | N | -   | -   | -    | -    | -    | -    | -    | -    | -    |
| MAPK13 | rs2071863  | G/A | 3'UTR    | N | -   | -   | -    | -    | -    | -    | -    | -    | -    |
| MAPRE1 | rs404543   | A/T | Promoter | N | -   | -   | -    | -    | -    | -    | -    | -    | -    |
|        | rs393250   | A/G | Promoter | Y | 99  | 99  | 0.45 | 0.45 | 0.75 | 0.65 | 0.67 | 0.50 | 0.91 |
| MAS1   | rs220723   | C/T | Promoter | Y | 90  | 87  | 0.20 | 0.19 | 0.00 | -    | -    | -    | -    |
| MCC    | None       | -   | -        | - | -   | -   | -    | -    | -    | -    | -    | -    | -    |
| MDS1   | rs1299563  | A/G | 5'UTR    | Y | 98  | 100 | 0.00 | 0.00 | -    | -    | -    | -    | -    |





|       |            |     |          |   |     |     |      |      |      |      |      |      |      |      |
|-------|------------|-----|----------|---|-----|-----|------|------|------|------|------|------|------|------|
|       | rs7828497  | G/T | Promoter | N | -   | -   | -    | -    | -    | -    | -    | -    | -    | -    |
|       | rs28907872 | C/A | Promoter | N | -   | -   | -    | -    | -    | -    | -    | -    | -    | -    |
| MMP17 | rs35466884 | A/G | CDS      | N | -   | -   | -    | -    | -    | -    | -    | -    | -    | -    |
| MMP21 | rs11244640 | G/T | Promoter | Y | 100 | 100 | 0.28 | 0.29 | 0.79 | 0.43 | 0.99 | 0.14 | 0.54 |      |
|       | rs34811493 | C/G | CDS      | Y | 100 | 99  | 0.00 | 0.00 | -    | -    | -    | -    | -    | -    |
|       | rs10901425 | A/G | CDS      | N | -   | -   | -    | -    | -    | -    | -    | -    | -    | -    |
| MMP25 | None       | -   | -        | - | -   | -   | -    | -    | -    | -    | -    | -    | -    | -    |
| MMP26 | rs2499953  | A/G | CDS      | Y | 100 | 100 | 0.26 | 0.26 | 0.78 | 0.99 | 1.00 | 1.00 | 1.00 | 1.00 |
| MMP8  | rs35308160 | A/T | Promoter | Y | 99  | 100 | 0.20 | 0.22 | 0.27 | 0.18 | 0.35 | 0.09 | 0.16 |      |
|       | rs35866072 | A/C | CDS      | Y | 100 | 100 | 0.01 | 0.00 | 0.94 | -    | -    | -    | -    | -    |
|       | rs1940475  | C/T | CDS      | N | -   | -   | -    | -    | -    | -    | -    | -    | -    | -    |
| MNDA  | rs16841138 | C/T | Promoter | Y | 100 | 100 | 0.10 | 0.10 | 0.69 | 0.83 | 0.51 | 0.87 | 0.98 |      |
|       | rs2276403  | C/T | CDS      | Y | 100 | 100 | 0.04 | 0.04 | 0.31 | -    | -    | -    | -    | -    |
| MPL   | rs710252   | A/G | Promoter | Y | 96  | 97  | 0.11 | 0.10 | 0.93 | 0.81 | 0.60 | 0.66 | 0.60 |      |
| MPO   | rs2243827  | G/T | Promoter | Y | 100 | 100 | 0.00 | 0.00 | -    | -    | -    | -    | -    | -    |
|       | rs2333227  | C/T | Promoter | N | -   | -   | -    | -    | -    | -    | -    | -    | -    | -    |
|       | rs2856857  | G/A | IVS      | N | -   | -   | -    | -    | -    | -    | -    | -    | -    | -    |
|       | rs7208693  | A/C | CDS      | N | -   | -   | -    | -    | -    | -    | -    | -    | -    | -    |
| MTHFR | rs1801133  | C/T | CDS      | Y | 96  | 96  | 0.46 | 0.44 | 0.95 | 0.20 | 0.11 | 0.79 | 0.23 |      |
|       | rs2274976  | A/G | CDS      | Y | 99  | 100 | 0.08 | 0.08 | 0.31 | 0.61 | 0.29 | 0.81 | 0.64 |      |
|       | rs1801131  | T/G | CDS      | N | -   | -   | -    | -    | -    | -    | -    | -    | -    | -    |
|       | rs3737964  | G/A | IVS      | N | -   | -   | -    | -    | -    | -    | -    | -    | -    | -    |
| MTRR  | rs10380    | C/T | CDS      | Y | 100 | 100 | 0.14 | 0.13 | 0.01 | -    | -    | -    | -    | -    |
|       | rs162036   | A/G | CDS      | Y | 100 | 100 | 0.17 | 0.17 | 0.04 | -    | -    | -    | -    | -    |
|       | rs16879334 | C/G | CDS      | Y | 100 | 100 | 0.21 | 0.20 | 0.09 | 0.43 | 0.38 | 0.60 | 0.59 |      |
|       | rs2287780  | C/T | CDS      | Y | 97  | 97  | 0.21 | 0.20 | 0.16 | 0.42 | 0.34 | 0.69 | 0.52 |      |
|       | rs2303080  | A/T | CDS      | N | -   | -   | -    | -    | -    | -    | -    | -    | -    | -    |
|       | rs2966952  | C/T | Promoter | N | -   | -   | -    | -    | -    | -    | -    | -    | -    | -    |
|       | rs1801394  | A/G | CDS      | N | -   | -   | -    | -    | -    | -    | -    | -    | -    | -    |
| MYBL1 | rs1392150  | G/A | Promoter | N | -   | -   | -    | -    | -    | -    | -    | -    | -    | -    |
| MYBL2 | rs2070235  | A/G | CDS      | Y | 100 | 100 | 0.12 | 0.11 | 0.33 | 0.78 | 0.50 | 0.58 | 0.45 |      |
|       | rs619289   | C/T | Promoter | Y | 100 | 100 | 0.20 | 0.20 | 0.51 | 0.95 | 0.89 | 0.78 | 0.84 |      |
| MYCN  | rs9653226  | C/T | Promoter | Y | 88  | 89  | 0.35 | 0.30 | 0.00 | -    | -    | -    | -    | -    |
| MYH11 | rs16967494 | C/T | CDS      | Y | 99  | 99  | 0.35 | 0.39 | 0.67 | 0.05 | 0.19 | 0.02 | 0.04 |      |
|       | rs215569   | C/G | Promoter | Y | 100 | 99  | 0.34 | 0.32 | 0.62 | 0.41 | 0.16 | 0.46 | 0.22 |      |
| MYH9  | rs8138710  | G/A | Promoter | N | -   | -   | -    | -    | -    | -    | -    | -    | -    | -    |
|       | rs2269529  | C/T | CDS      | N | -   | -   | -    | -    | -    | -    | -    | -    | -    | -    |
| MYLK  | rs3796164  | A/G | CDS      | N | -   | -   | -    | -    | -    | -    | -    | -    | -    | -    |
|       | rs9840993  | A/G | CDS      | N | -   | -   | -    | -    | -    | -    | -    | -    | -    | -    |
|       | rs2700408  | A/G | 5'UTR    | Y | 100 | 100 | 0.41 | 0.42 | 0.77 | 0.24 | 0.50 | 0.15 | 0.76 |      |
|       | rs28497577 | G/T | CDS      | Y | 100 | 100 | 0.07 | 0.06 | 0.89 | 0.52 | 0.23 | 0.80 | 0.23 |      |
|       | rs34542174 | A/G | CDS      | Y | 97  | 94  | 0.00 | 0.00 | -    | -    | -    | -    | -    | -    |



|       |            |     |          |   |     |     |      |      |      |      |      |      |      |
|-------|------------|-----|----------|---|-----|-----|------|------|------|------|------|------|------|
|       | rs8453     | C/A | 3'UTR    | N | -   | -   | -    | -    | -    | -    | -    | -    | -    |
|       | rs9724615  | C/T | Promoter | Y | 100 | 100 | 0.08 | 0.05 | 0.54 | -    | -    | -    | -    |
| NTRK1 | rs1007211  | A/G | CDS      | N | -   | -   | -    | -    | -    | -    | -    | -    | -    |
| NTRK3 | rs1863494  | A/T | IVS      | Y | 100 | 100 | 0.14 | 0.16 | 0.87 | 0.24 | 0.57 | 0.12 | 0.34 |
|       | rs4887400  | A/C | IVS      | Y | 80  | 85  | 0.42 | 0.44 | 0.00 | -    | -    | -    | -    |
|       | rs7161806  | A/G | IVS      | Y | 100 | 100 | 0.44 | 0.44 | 0.39 | 0.74 | 0.75 | 0.62 | 0.95 |
|       | rs8035178  | C/G | IVS      | Y | 99  | 100 | 0.21 | 0.23 | 0.41 | 0.58 | 0.85 | 0.32 | 0.38 |
|       | rs3784429  | A/G | IVS      | Y | 100 | 100 | 0.30 | 0.32 | 0.00 | -    | -    | -    | -    |
|       | rs1369430  | C/T | IVS      | Y | 100 | 100 | 0.32 | 0.32 | 0.25 | 0.50 | 0.57 | 0.57 | 0.86 |
|       | rs17755433 | C/T | IVS      | Y | 97  | 98  | 0.16 | 0.18 | 0.01 | -    | -    | -    | -    |
|       | rs3784433  | G/T | IVS      | Y | 99  | 100 | 0.03 | 0.03 | 0.51 | -    | -    | -    | -    |
|       | rs16941206 | A/G | IVS      | Y | 100 | 100 | 0.19 | 0.21 | 0.04 | -    | -    | -    | -    |
|       | rs1435397  | A/G | IVS      | Y | 91  | 91  | 0.15 | 0.14 | 0.52 | -    | -    | -    | -    |
|       | rs11630902 | G/T | IVS      | Y | 99  | 99  | 0.21 | 0.20 | 0.81 | 0.37 | 0.21 | 0.75 | 0.85 |
|       | rs7170215  | A/T | IVS      | Y | 100 | 100 | 0.24 | 0.25 | 0.89 | 0.91 | 0.74 | 0.89 | 0.75 |
|       | rs1107292  | C/G | IVS      | Y | 80  | 82  | 0.11 | 0.14 | 0.17 | -    | -    | -    | -    |
|       | rs7168277  | C/G | IVS      | Y | 100 | 100 | 0.21 | 0.23 | 0.00 | -    | -    | -    | -    |
|       | rs12595373 | C/G | IVS      | Y | 99  | 99  | 0.06 | 0.05 | 0.13 | -    | -    | -    | -    |
|       | rs12595249 | C/G | IVS      | Y | 100 | 100 | 0.22 | 0.23 | 0.00 | -    | -    | -    | -    |
|       | rs6496455  | A/G | IVS      | Y | 100 | 100 | 0.18 | 0.18 | 0.43 | 0.89 | 0.52 | 0.61 | 0.52 |
|       | rs922232   | A/T | IVS      | Y | 100 | 100 | 0.16 | 0.16 | 0.80 | 0.40 | 0.71 | 0.24 | 0.94 |
|       | rs2117655  | G/T | IVS      | Y | 100 | 100 | 0.36 | 0.36 | 0.59 | 0.99 | 0.84 | 0.93 | 0.87 |
|       | rs12438418 | A/G | IVS      | Y | 100 | 100 | 0.04 | 0.04 | 0.91 | -    | -    | -    | -    |
|       | rs3784419  | A/G | IVS      | Y | 100 | 99  | 0.13 | 0.12 | 0.79 | 0.77 | 0.44 | 0.72 | 0.43 |
|       | rs3903308  | C/T | IVS      | Y | 100 | 100 | 0.41 | 0.41 | 0.36 | 0.68 | 0.49 | 0.77 | 0.86 |
|       | rs17755717 | A/G | IVS      | Y | 99  | 100 | 0.06 | 0.04 | 0.88 | -    | -    | -    | -    |
|       | rs12592807 | C/T | IVS      | Y | 99  | 100 | 0.11 | 0.12 | 0.16 | 0.38 | 0.24 | 0.45 | 0.31 |
|       | rs2303464  | A/G | IVS      | Y | 100 | 100 | 0.14 | 0.14 | 0.74 | 0.95 | 0.98 | 0.74 | 0.76 |
|       | rs16940994 | A/G | IVS      | Y | 100 | 100 | 0.07 | 0.07 | 0.52 | 0.89 | 0.61 | 0.78 | 0.72 |
|       | rs16941424 | C/T | IVS      | Y | 100 | 100 | 0.14 | 0.14 | 0.23 | 0.98 | 0.87 | 0.84 | 0.93 |
|       | rs17831280 | C/T | IVS      | Y | 100 | 100 | 0.07 | 0.07 | 0.48 | 0.80 | 0.77 | 0.69 | 0.84 |
|       | rs3784421  | G/T | IVS      | Y | 98  | 99  | 0.06 | 0.07 | 0.49 | 0.30 | 0.12 | 0.88 | 0.15 |
|       | rs4887212  | C/T | IVS      | Y | 98  | 96  | 0.43 | 0.47 | 0.31 | 0.09 | 0.42 | 0.03 | 0.08 |
|       | rs7176520  | C/T | IVS      | Y | 100 | 100 | 0.47 | 0.48 | 0.50 | 0.02 | 0.01 | 0.07 | 0.01 |
|       | rs6496453  | A/G | IVS      | N | -   | -   | -    | -    | -    | -    | -    | -    | -    |
|       | rs11073752 | C/T | IVS      | N | -   | -   | -    | -    | -    | -    | -    | -    | -    |
|       | rs8032073  | G/A | IVS      | N | -   | -   | -    | -    | -    | -    | -    | -    | -    |
| NUMA1 | rs3750913  | G/C | CDS      | N | -   | -   | -    | -    | -    | -    | -    | -    | -    |
|       | rs34311364 | A/C | CDS      | N | -   | -   | -    | -    | -    | -    | -    | -    | -    |
|       | rs949323   | A/C | 3'UTR    | N | -   | -   | -    | -    | -    | -    | -    | -    | -    |
|       | rs949324   | C/G | 3'UTR    | N | -   | -   | -    | -    | -    | -    | -    | -    | -    |
|       | rs1573502  | A/G | IVS      | Y | 100 | 99  | 0.25 | 0.26 | 0.93 | 0.86 | 0.77 | 0.61 | 0.66 |



|         |            |     |          |   |     |     |      |      |      |      |      |      |      |   |
|---------|------------|-----|----------|---|-----|-----|------|------|------|------|------|------|------|---|
|         | rs1629011  | C/T | CDS      | N | -   | -   | -    | -    | -    | -    | -    | -    | -    | - |
|         | rs1698681  | T/C | CDS      | N | -   | -   | -    | -    | -    | -    | -    | -    | -    | - |
|         | rs1698709  | G/A | IVS      | N | -   | -   | -    | -    | -    | -    | -    | -    | -    | - |
|         | rs1778111  | G/A | CDS      | N | -   | -   | -    | -    | -    | -    | -    | -    | -    | - |
|         | rs2596268  | A/T | Promoter | Y | 100 | 100 | 0.18 | 0.18 | 0.00 | -    | -    | -    | -    | - |
|         | rs1324348  | C/A | Promoter | N | -   | -   | -    | -    | -    | -    | -    | -    | -    | - |
|         | rs1324349  | C/G | Promoter | N | -   | -   | -    | -    | -    | -    | -    | -    | -    | - |
|         | rs2798892  | C/A | Promoter | N | -   | -   | -    | -    | -    | -    | -    | -    | -    | - |
| PDGFRB  | rs2229562  | G/A | 3'UTR    | N | -   | -   | -    | -    | -    | -    | -    | -    | -    | - |
|         | rs2302273  | A/G | 5'UTR    | Y | 97  | 98  | 0.12 | 0.10 | 0.77 | 0.24 | 0.40 | 0.08 | 0.07 |   |
| PEA15   | rs680083   | A/G | IVS      | Y | 100 | 100 | 0.49 | 0.49 | 0.51 | 0.44 | 0.23 | 0.87 | 0.40 |   |
| PENK    | rs2609998  | G/A | Promoter | N | -   | -   | -    | -    | -    | -    | -    | -    | -    | - |
|         | rs1975285  | C/G | Promoter | Y | 98  | 96  | 0.14 | 0.13 | 0.88 | 0.98 | 0.98 | 0.96 | 0.99 |   |
| PER1    | rs2518023  | C/A | Promoter | N | -   | -   | -    | -    | -    | -    | -    | -    | -    | - |
|         | rs34275201 | A/C | Promoter | Y | 89  | 94  | 0.15 | 0.12 | 0.16 | -    | -    | -    | -    | - |
| PICALM  | rs694353   | C/A | Promoter | N | -   | -   | -    | -    | -    | -    | -    | -    | -    | - |
|         | rs10898433 | G/T | Promoter | Y | 82  | 87  | 0.42 | 0.42 | 0.01 | -    | -    | -    | -    | - |
| PIK3CG  | rs4730204  | C/T | Promoter | Y | 100 | 100 | 0.34 | 0.34 | 0.15 | 0.78 | 0.58 | 0.72 | 0.99 |   |
| PIM1    | rs262936   | C/G | CDS      | N | -   | -   | -    | -    | -    | -    | -    | -    | -    | - |
| PIT1    | rs10511134 | A/T | Promoter | N | -   | -   | -    | -    | -    | -    | -    | -    | -    | - |
| PLAG1   | rs6474051  | C/T | IVS      | N | -   | -   | -    | -    | -    | -    | -    | -    | -    | - |
|         | rs35883156 | G/T | CDS      | Y | 0   | 0   | -    | -    | -    | -    | -    | -    | -    | - |
| PLAT    | None       | -   | -        | - | -   | -   | -    | -    | -    | -    | -    | -    | -    | - |
| PLK2    | rs15915    | G/A | 3'UTR    | N | -   | -   | -    | -    | -    | -    | -    | -    | -    | - |
|         | rs15009    | C/G | 3'UTR    | Y | 97  | 98  | 0.34 | 0.36 | 0.00 | -    | -    | -    | -    | - |
|         | rs702720   | A/G | Promoter | Y | 99  | 100 | 0.07 | 0.06 | 0.10 | 0.51 | 0.98 | 0.48 | 0.43 |   |
| PNPO    | rs2325751  | A/C | Promoter | Y | 100 | 99  | 0.22 | 0.22 | 0.50 | 0.50 | 0.24 | 0.91 | 0.73 |   |
| PON1    | rs13306698 | A/G | CDS      | Y | 100 | 100 | 0.09 | 0.07 | 0.48 | 0.28 | 0.11 | 0.82 | 0.11 |   |
|         | rs854571   | C/T | Promoter | Y | 100 | 100 | 0.30 | 0.31 | 0.23 | 0.10 | 0.09 | 0.59 | 0.29 |   |
|         | rs854573   | C/T | Promoter | N | -   | -   | -    | -    | -    | -    | -    | -    | -    | - |
|         | rs662      | T/C | CDS      | N | -   | -   | -    | -    | -    | -    | -    | -    | -    | - |
|         | rs705380   | C/G | Promoter | N | -   | -   | -    | -    | -    | -    | -    | -    | -    | - |
|         | rs705379   | G/A | Promoter | N | -   | -   | -    | -    | -    | -    | -    | -    | -    | - |
| POR     | rs3823884  | C/A | 5'UTR    | N | -   | -   | -    | -    | -    | -    | -    | -    | -    | - |
|         | rs1057868  | C/T | CDS      | N | -   | -   | -    | -    | -    | -    | -    | -    | -    | - |
| POU2AF1 | rs4938510  | A/C | Promoter | N | -   | -   | -    | -    | -    | -    | -    | -    | -    | - |
|         | rs3802843  | G/A | Promoter | N | -   | -   | -    | -    | -    | -    | -    | -    | -    | - |
| PPIA    | rs4720485  | A/T | Promoter | Y | 90  | 79  | 0.06 | 0.05 | 0.92 | -    | -    | -    | -    | - |
|         | rs6850     | A/G | 5'UTR    | N | -   | -   | -    | -    | -    | -    | -    | -    | -    | - |
| PPID    | rs17843877 | A/G | Promoter | Y | 80  | 81  | 0.16 | 0.13 | 0.02 | -    | -    | -    | -    | - |
|         | rs2230222  | A/T | CDS      | Y | 100 | 100 | 0.00 | 0.00 | -    | -    | -    | -    | -    | - |
|         | rs8396     | A/G | 3'UTR    | Y | 99  | 100 | 0.21 | 0.20 | 0.67 | 0.77 | 0.50 | 0.75 | 0.49 |   |

|          |            |     |          |   |     |     |      |      |      |      |      |      |      |   |
|----------|------------|-----|----------|---|-----|-----|------|------|------|------|------|------|------|---|
|          | rs2070629  | A/G | 5'UTR    | N | -   | -   | -    | -    | -    | -    | -    | -    | -    | - |
| PPIH     | rs12145700 | C/T | Promoter | Y | 100 | 100 | 0.11 | 0.09 | 0.05 | -    | -    | -    | -    | - |
| PPP2R5A  | rs968531   | G/A | Promoter | N | -   | -   | -    | -    | -    | -    | -    | -    | -    | - |
|          | rs351413   | G/A | Promoter | N | -   | -   | -    | -    | -    | -    | -    | -    | -    | - |
|          | rs17042034 | G/T | 5'UTR    | N | -   | -   | -    | -    | -    | -    | -    | -    | -    | - |
|          | rs2236597  | C/T | Promoter | Y | 100 | 100 | 0.17 | 0.17 | 0.54 | 1.00 | 0.98 | 0.86 | 0.87 |   |
| PRCC     | rs11264542 | C/T | CDS      | Y | 96  | 96  | 0.10 | 0.12 | 0.71 | 0.42 | 0.25 | 0.43 | 0.21 |   |
| PRDM16   | None       | -   | -        | - | -   | -   | -    | -    | -    | -    | -    | -    | -    | - |
| PRDX2    | rs8104763  | A/G | Promoter | N | -   | -   | -    | -    | -    | -    | -    | -    | -    | - |
|          | rs8107906  | C/T | Promoter | N | -   | -   | -    | -    | -    | -    | -    | -    | -    | - |
| PRDX4    | rs475171   | G/A | Promoter | N | -   | -   | -    | -    | -    | -    | -    | -    | -    | - |
|          | rs3795220  | A/G | Promoter | Y | 100 | 100 | 0.43 | 0.39 | 0.00 | -    | -    | -    | -    | - |
|          | rs525497   | C/G | Promoter | Y | 100 | 100 | 0.46 | 0.48 | 0.00 | -    | -    | -    | -    | - |
| PRG4     | rs2273779  | A/G | CDS      | Y | 100 | 100 | 0.12 | 0.13 | 0.26 | 0.84 | 0.48 | 0.82 | 0.72 |   |
| PRL      | rs849877   | A/G | Promoter | Y | 100 | 100 | 0.25 | 0.27 | 0.65 | 0.58 | 0.90 | 0.31 | 0.61 |   |
| PRMT1    | rs975484   | C/G | Promoter | Y | 100 | 100 | 0.19 | 0.20 | 0.58 | 0.88 | 0.79 | 0.86 | 0.77 |   |
| PRODH    | rs9604911  | G/T | Promoter | Y | 100 | 100 | 0.28 | 0.29 | 0.92 | 0.80 | 0.57 | 0.64 | 0.54 |   |
|          | rs4819756  | A/G | CDS      | N | -   | -   | -    | -    | -    | -    | -    | -    | -    | - |
|          | rs2008720  | T/G | CDS      | N | -   | -   | -    | -    | -    | -    | -    | -    | -    | - |
| PRSS15   | None       | -   | -        | - | -   | -   | -    | -    | -    | -    | -    | -    | -    | - |
| PSIP1    | rs2277191  | G/A | Promoter | N | -   | -   | -    | -    | -    | -    | -    | -    | -    | - |
| PSMA1    | rs1403247  | G/T | 5'UTR    | Y | 100 | 100 | 0.38 | 0.38 | 0.08 | 0.08 | 0.31 | 0.10 | 0.91 |   |
| PTGIS    | rs5582     | G/A | 5'UTR    | N | -   | -   | -    | -    | -    | -    | -    | -    | -    | - |
| PTPRN    | rs35314717 | A/C | CDS      | Y | 98  | 99  | 0.00 | 0.00 | -    | -    | -    | -    | -    | - |
|          | rs7591986  | A/C | IVS      | Y | 0   | 0   | -    | -    | -    | -    | -    | -    | -    | - |
| RAB5A    | rs35094497 | G/C | 5'UTR    | N | -   | -   | -    | -    | -    | -    | -    | -    | -    | - |
|          | rs6803052  | C/T | Promoter | N | -   | -   | -    | -    | -    | -    | -    | -    | -    | - |
|          | rs1133328  | A/C | Promoter | Y | 100 | 100 | 0.14 | 0.15 | 0.68 | 0.34 | 0.47 | 0.25 | 0.43 |   |
|          | rs17181400 | C/G | IVS      | Y | 100 | 100 | 0.11 | 0.11 | 0.86 | 0.74 | 0.58 | 0.72 | 0.69 |   |
| RALBP1   | rs1813100  | G/A | IVS      | N | -   | -   | -    | -    | -    | -    | -    | -    | -    | - |
|          | rs1049553  | C/T | Promoter | Y | 98  | 96  | 0.03 | 0.03 | 0.52 | -    | -    | -    | -    | - |
|          | rs2277709  | C/T | Promoter | Y | 99  | 97  | 0.10 | 0.08 | 0.68 | 0.20 | 0.46 | 0.12 | 0.19 |   |
| RANBP17  | rs7722978  | A/T | Promoter | Y | 100 | 100 | 0.20 | 0.21 | 0.48 | 0.83 | 0.75 | 0.71 | 0.84 |   |
| RAP1A    | rs1359414  | C/T | Promoter | Y | 87  | 79  | 0.16 | 0.16 | 0.60 | -    | -    | -    | -    | - |
|          | rs563083   | C/T | 3'UTR    | Y | 99  | 100 | 0.25 | 0.24 | 0.96 | 0.08 | 0.09 | 0.29 | 0.30 |   |
| RAP1GDS1 | rs501110   | C/G | Promoter | Y | 99  | 99  | 0.32 | 0.31 | 0.60 | 0.93 | 0.86 | 0.69 | 0.70 |   |
| RARG     | rs7487904  | G/C | 5'UTR    | N | -   | -   | -    | -    | -    | -    | -    | -    | -    | - |
| RASGRF1  | rs11635204 | C/G | IVS      | Y | 100 | 100 | 0.27 | 0.29 | 0.13 | 0.04 | 0.19 | 0.12 | 0.51 |   |
|          | rs7166032  | A/G | IVS      | Y | 99  | 100 | 0.47 | 0.45 | 0.25 | 0.46 | 0.53 | 0.23 | 0.25 |   |
|          | rs7166598  | C/T | IVS      | Y | 100 | 100 | 0.15 | 0.16 | 0.13 | 0.66 | 0.94 | 0.51 | 0.56 |   |
|          | rs2304991  | C/T | IVS      | Y | 100 | 100 | 0.40 | 0.42 | 0.99 | 0.57 | 0.36 | 0.88 | 0.48 |   |
|          | rs16970460 | G/T | IVS      | Y | 99  | 97  | 0.04 | 0.03 | 0.38 | -    | -    | -    | -    | - |

|       |            |     |          |   |     |     |      |      |      |      |      |      |      |
|-------|------------|-----|----------|---|-----|-----|------|------|------|------|------|------|------|
|       | rs2016133  | G/T | IVS      | Y | 100 | 100 | 0.49 | 0.46 | 0.29 | 0.41 | 0.39 | 0.26 | 0.23 |
|       | rs11632649 | A/G | IVS      | Y | 100 | 100 | 0.21 | 0.22 | 0.66 | 0.69 | 0.44 | 0.92 | 0.49 |
|       | rs12101606 | A/G | IVS      | Y | 100 | 99  | 0.30 | 0.30 | 0.03 | -    | -    | -    | -    |
|       | rs4778603  | A/T | IVS      | Y | 100 | 100 | 0.43 | 0.45 | 0.11 | 0.53 | 0.49 | 0.35 | 0.33 |
|       | rs2304993  | C/T | IVS      | Y | 100 | 100 | 0.13 | 0.12 | 0.36 | 0.73 | 0.77 | 0.49 | 0.93 |
|       | rs12443101 | A/C | IVS      | Y | 100 | 100 | 0.33 | 0.33 | 0.50 | 0.79 | 0.76 | 0.52 | 0.95 |
|       | rs3825929  | A/T | IVS      | Y | 100 | 100 | 0.33 | 0.33 | 0.74 | 0.71 | 0.50 | 0.89 | 0.83 |
|       | rs3816282  | C/T | IVS      | Y | 100 | 100 | 0.18 | 0.21 | 0.74 | 0.19 | 0.43 | 0.06 | 0.06 |
|       | rs11629560 | C/T | IVS      | Y | 92  | 91  | 0.17 | 0.16 | 0.34 | -    | -    | -    | -    |
|       | rs930538   | A/G | IVS      | Y | 99  | 99  | 0.23 | 0.22 | 0.49 | 0.96 | 0.88 | 0.85 | 0.84 |
|       | rs13379704 | T/C | IVS      | Y | 100 | 100 | 0.06 | 0.07 | 0.91 | 0.05 | 0.03 | 0.36 | 0.07 |
|       | rs11629697 | A/G | IVS      | Y | 100 | 100 | 0.30 | 0.29 | 0.02 | -    | -    | -    | -    |
|       | rs12911829 | C/T | IVS      | Y | 92  | 95  | 0.37 | 0.39 | 0.00 | -    | -    | -    | -    |
|       | rs3743195  | A/G | IVS      | Y | 100 | 99  | 0.16 | 0.16 | 0.98 | 0.92 | 0.75 | 0.91 | 0.84 |
|       | rs4778861  | C/T | IVS      | Y | 100 | 100 | 0.10 | 0.09 | 0.28 | 0.89 | 0.93 | 0.72 | 0.72 |
|       | rs2044227  | C/G | IVS      | Y | 0   | 0   | -    | -    | -    | -    | -    | -    | -    |
|       | rs12903619 | C/T | IVS      | Y | 100 | 100 | 0.37 | 0.37 | 0.85 | 0.99 | 0.97 | 0.91 | 0.95 |
|       | rs7183818  | C/T | IVS      | Y | 85  | 94  | 0.45 | 0.47 | 0.00 | -    | -    | -    | -    |
|       | rs12440502 | G/T | IVS      | Y | 99  | 100 | 0.40 | 0.39 | 0.29 | 0.18 | 0.13 | 0.63 | 0.64 |
|       | rs12900613 | C/G | IVS      | Y | 96  | 90  | 0.19 | 0.20 | 0.91 | -    | -    | -    | -    |
|       | rs12914792 | C/T | IVS      | Y | 100 | 100 | 0.09 | 0.08 | 0.39 | 0.93 | 0.81 | 0.81 | 0.78 |
|       | rs16970374 | A/G | IVS      | Y | 100 | 100 | 0.11 | 0.10 | 0.43 | 0.37 | 0.19 | 0.67 | 0.47 |
|       | rs16970495 | A/G | IVS      | Y | 99  | 97  | 0.42 | 0.41 | 0.53 | 0.59 | 0.96 | 0.35 | 0.54 |
|       | rs2304992  | A/G | IVS      | Y | 100 | 100 | 0.22 | 0.24 | 0.32 | 0.62 | 0.54 | 0.44 | 0.39 |
|       | rs6495361  | A/C | Promoter | Y | 96  | 97  | 0.15 | 0.15 | 0.51 | 0.26 | 0.58 | 0.31 | 0.87 |
|       | rs7169735  | C/T | IVS      | Y | 88  | 87  | 0.36 | 0.36 | 0.40 | -    | -    | -    | -    |
|       | rs7174399  | A/G | IVS      | Y | 97  | 99  | 0.29 | 0.27 | 0.13 | 0.24 | 0.67 | 0.10 | 0.23 |
|       | rs7183127  | A/G | IVS      | Y | 100 | 100 | 0.41 | 0.40 | 0.41 | 0.84 | 0.63 | 0.81 | 0.65 |
|       | rs8030257  | G/A | IVS      | Y | 100 | 100 | 0.23 | 0.26 | 0.27 | 0.18 | 0.43 | 0.05 | 0.05 |
|       | rs987057   | A/G | IVS      | Y | 85  | 86  | 0.23 | 0.20 | 0.74 | -    | -    | -    | -    |
|       | rs2230518  | C/T | IVS      | Y | 100 | 100 | 0.23 | 0.22 | 0.36 | 0.94 | 0.74 | 0.74 | 0.69 |
|       | rs744060   | A/G | IVS      | N | -   | -   | -    | -    | -    | -    | -    | -    | -    |
|       | rs8025226  | C/T | IVS      | N | -   | -   | -    | -    | -    | -    | -    | -    | -    |
|       | rs997285   | C/A | IVS      | N | -   | -   | -    | -    | -    | -    | -    | -    | -    |
|       | rs4238514  | G/A | IVS      | N | -   | -   | -    | -    | -    | -    | -    | -    | -    |
|       | rs12148343 | C/T | IVS      | N | -   | -   | -    | -    | -    | -    | -    | -    | -    |
|       | rs17245773 | A/G | IVS      | N | -   | -   | -    | -    | -    | -    | -    | -    | -    |
|       | rs8039661  | C/T | IVS      | N | -   | -   | -    | -    | -    | -    | -    | -    | -    |
| RBBP4 | rs704874   | G/T | Promoter | N | -   | -   | -    | -    | -    | -    | -    | -    | -    |
| RBM15 | rs3806456  | C/A | Promoter | N | -   | -   | -    | -    | -    | -    | -    | -    | -    |
|       | rs12022711 | C/T | Promoter | Y | 90  | 97  | 0.31 | 0.28 | 0.64 | -    | -    | -    | -    |
|       | rs2030013  | C/G | Promoter | Y | 99  | 100 | 0.28 | 0.26 | 0.92 | 0.45 | 0.21 | 0.84 | 0.27 |



|          |            |     |          |   |     |     |      |      |      |       |       |      |      |   |
|----------|------------|-----|----------|---|-----|-----|------|------|------|-------|-------|------|------|---|
| RECQL4   | rs4244613  | G/A | Promoter | N | -   | -   | -    | -    | -    | -     | -     | -    | -    | - |
|          | rs35842750 | T/C | CDS      | N | -   | -   | -    | -    | -    | -     | -     | -    | -    | - |
| RELB     | rs34300722 | A/T | Promoter | N | -   | -   | -    | -    | -    | -     | -     | -    | -    | - |
| RET      | rs1799939  | A/G | CDS      | N | -   | -   | -    | -    | -    | -     | -     | -    | -    | - |
| RFC2     | rs3135712  | A/G | 3'UTR    | Y | 100 | 100 | 0.09 | 0.07 | 0.65 | 0.22  | 0.61  | 0.10 | 0.10 |   |
| RGS19    | rs6011280  | C/A | 3'UTR    | N | -   | -   | -    | -    | -    | -     | -     | -    | -    | - |
|          | rs8121509  | C/T | IVS      | N | -   | -   | -    | -    | -    | -     | -     | -    | -    | - |
|          | rs6010716  | A/C | Promoter | N | -   | -   | -    | -    | -    | -     | -     | -    | -    | - |
| RHOD     | None       | -   | -        | - | -   | -   | -    | -    | -    | -     | -     | -    | -    | - |
| RHOH     | rs13142049 | C/T | 5'UTR    | Y | 100 | 100 | 0.14 | 0.15 | 0.29 | 0.22  | 0.22  | 0.42 | 0.72 |   |
|          | rs1996555  | A/G | Promoter | Y | 100 | 100 | 0.15 | 0.13 | 0.16 | 0.21  | 0.08  | 0.54 | 0.30 |   |
|          | rs2276894  | C/G | 5'UTR    | Y | 100 | 100 | 0.08 | 0.11 | 0.43 | 0.03  | 0.01  | 0.45 | 0.01 |   |
|          | rs3796523  | C/G | Promoter | Y | 100 | 99  | 0.24 | 0.23 | 0.12 | 0.49  | 0.71  | 0.23 | 0.45 |   |
|          | rs1053504  | A/G | 5'UTR    | N | -   | -   | -    | -    | -    | -     | -     | -    | -    | - |
|          | rs2245466  | C/G | 5'UTR    | N | -   | -   | -    | -    | -    | -     | -     | -    | -    | - |
| ROS1     | rs529038   | T/C | CDS      | N | -   | -   | -    | -    | -    | -     | -     | -    | -    | - |
|          | rs619203   | G/C | CDS      | N | -   | -   | -    | -    | -    | -     | -     | -    | -    | - |
|          | rs529156   | T/G | CDS      | N | -   | -   | -    | -    | -    | -     | -     | -    | -    | - |
|          | rs1998206  | A/C | CDS      | Y | 100 | 99  | 0.12 | 0.15 | 0.21 | 0.003 | 0.005 | 0.44 | 0.02 |   |
|          | rs2243380  | A/G | CDS      | Y | 100 | 100 | 0.05 | 0.05 | 0.69 | -     | -     | -    | -    |   |
|          | rs35841892 | A/G | CDS      | Y | 97  | 95  | 0.00 | 0.00 | 0.97 | -     | -     | -    | -    |   |
| RPN1     | None       | -   | -        | - | -   | -   | -    | -    | -    | -     | -     | -    | -    | - |
| RPN2     | rs28372682 | C/T | CDS      | N | -   | -   | -    | -    | -    | -     | -     | -    | -    | - |
| RRM1     | rs11030918 | C/T | Promoter | Y | 98  | 99  | 0.24 | 0.24 | 0.69 | 0.81  | 0.55  | 0.74 | 0.97 |   |
|          | rs1465952  | T/C | Promoter | Y | 100 | 99  | 0.07 | 0.08 | 0.31 | 0.04  | 0.04  | 0.21 | 0.11 |   |
|          | rs1662162  | A/G | Promoter | Y | 100 | 100 | 0.25 | 0.25 | 0.56 | 0.56  | 0.38  | 0.95 | 0.69 |   |
| RRM2     | None       | -   | -        | - | -   | -   | -    | -    | -    | -     | -     | -    | -    | - |
| RUNX1    | rs743289   | C/A | IVS      | N | -   | -   | -    | -    | -    | -     | -     | -    | -    | - |
| RUVBL1   | rs1057156  | C/T | 3'UTR    | Y | 85  | 88  | 0.09 | 0.10 | 0.11 | -     | -     | -    | -    |   |
| S100A8   | rs11205281 | C/T | Promoter | Y | 99  | 99  | 0.09 | 0.10 | 0.06 | 0.13  | 0.81  | 0.07 | 0.79 |   |
| S100A9   | rs11205276 | C/G | Promoter | Y | 99  | 99  | 0.14 | 0.15 | 0.44 | 0.17  | 0.33  | 0.25 | 0.47 |   |
| S100G    | rs5980310  | C/T | Promoter | Y | 99  | 100 | 0.28 | 0.29 | 0.00 | -     | -     | -    | -    |   |
| SAT2     | rs13894    | C/T | CDS      | Y | 99  | 99  | 0.03 | 0.03 | 0.46 | -     | -     | -    | -    |   |
| SBDS     | rs4718438  | C/G | Promoter | N | -   | -   | -    | -    | -    | -     | -     | -    | -    | - |
|          | rs3204901  | G/A | 3'UTR    | N | -   | -   | -    | -    | -    | -     | -     | -    | -    | - |
| SELENBP1 | rs3811408  | C/T | Promoter | Y | 98  | 98  | 0.10 | 0.09 | 0.80 | 0.42  | 0.62  | 0.12 | 0.12 |   |
| SEMA3C   | rs1527482  | A/G | CDS      | Y | 99  | 99  | 0.05 | 0.05 | 0.62 | 0.22  | 0.21  | 0.87 | 0.89 |   |
|          | rs2057880  | A/C | Promoter | Y | 0   | 0   | -    | -    | -    | -     | -     | -    | -    |   |
| SEPP1    | rs7579     | A/G | IVS      | Y | 99  | 100 | 0.31 | 0.30 | 0.59 | 0.06  | 0.21  | 0.12 | 0.49 |   |
|          | rs28919882 | C/T | Promoter | Y | 0   | 0   | -    | -    | -    | -     | -     | -    | -    |   |
| SEPT6    | rs4825664  | A/G | Promoter | N | -   | -   | -    | -    | -    | -     | -     | -    | -    | - |
|          | rs17261138 | A/C | 5'UTR    | Y | 95  | 93  | 0.36 | 0.36 | 0.00 | -     | -     | -    | -    |   |



|         |            |     |          |   |     |     |      |      |      |      |      |      |      |
|---------|------------|-----|----------|---|-----|-----|------|------|------|------|------|------|------|
|         | rs1050239  | A/G | CDS      | Y | 99  | 100 | 0.15 | 0.17 | 0.72 | 0.61 | 0.55 | 0.35 | 0.32 |
| SMYD3   | rs6673291  | A/G | Promoter | Y | 100 | 100 | 0.39 | 0.39 | 0.18 | 0.57 | 0.70 | 0.35 | 0.65 |
|         | rs8025     | G/A | 3'UTR    | N | -   | -   | -    | -    | -    | -    | -    | -    | -    |
|         | rs6702358  | C/A | IVS      | N | -   | -   | -    | -    | -    | -    | -    | -    | -    |
| SNRPB2  | rs2073055  | A/C | 5'UTR    | Y | 88  | 84  | 0.33 | 0.31 | 0.00 | -    | -    | -    | -    |
|         | rs3761298  | C/T | Promoter | Y | 99  | 98  | 0.25 | 0.28 | 0.87 | 0.38 | 0.14 | 0.49 | 0.14 |
| SOCS1   | rs7187133  | C/T | Promoter | N | -   | -   | -    | -    | -    | -    | -    | -    | -    |
|         | rs33977706 | C/A | Promoter | N | -   | -   | -    | -    | -    | -    | -    | -    | -    |
|         | rs35053580 | G/A | Promoter | N | -   | -   | -    | -    | -    | -    | -    | -    | -    |
|         | rs243330   | A/G | Promoter | Y | 94  | 94  | 0.20 | 0.20 | 0.96 | -    | -    | -    | -    |
| SOCS3   | rs8064821  | C/A | Promoter | N | -   | -   | -    | -    | -    | -    | -    | -    | -    |
| SOD1    | rs17881274 | C/T | Promoter | Y | 100 | 100 | 0.00 | 0.00 | -    | -    | -    | -    | -    |
| SOD2    | rs5746090  | G/A | Promoter | N | -   | -   | -    | -    | -    | -    | -    | -    | -    |
|         | rs5746091  | G/A | Promoter | N | -   | -   | -    | -    | -    | -    | -    | -    | -    |
|         | rs5746092  | C/G | 5'UTR    | N | -   | -   | -    | -    | -    | -    | -    | -    | -    |
| SOX17   | rs12234941 | G/T | Promoter | Y | 96  | 97  | 0.37 | 0.36 | 0.97 | 0.75 | 0.87 | 0.50 | 0.57 |
| SPECC1  | rs11868429 | C/T | IVS      | Y | 100 | 100 | 0.11 | 0.09 | 0.20 | 0.43 | 0.15 | 0.74 | 0.16 |
| SPINK5  | rs2303070  | A/C | CDS      | Y | 100 | 100 | 0.29 | 0.31 | 0.01 | -    | -    | -    | -    |
|         | rs3756688  | C/T | Promoter | Y | 92  | 94  | 0.08 | 0.06 | 0.47 | -    | -    | -    | -    |
|         | rs6892205  | A/G | CDS      | N | -   | -   | -    | -    | -    | -    | -    | -    | -    |
|         | rs2303063  | A/G | CDS      | N | -   | -   | -    | -    | -    | -    | -    | -    | -    |
|         | rs17775319 | A/G | CDS      | N | -   | -   | -    | -    | -    | -    | -    | -    | -    |
| SPINT2  | rs17526161 | G/A | Promoter | N | -   | -   | -    | -    | -    | -    | -    | -    | -    |
|         | rs7253245  | G/T | Promoter | Y | 94  | 96  | 0.35 | 0.35 | 0.41 | -    | -    | -    | -    |
| SPRY2   | rs700397   | A/C | 3'UTR    | N | -   | -   | -    | -    | -    | -    | -    | -    | -    |
|         | rs11911    | G/T | 3'UTR    | Y | 99  | 98  | 0.43 | 0.43 | 0.31 | 1.00 | 1.00 | 0.93 | 0.96 |
| SRD5A1  | None       | -   | -        | - | -   | -   | -    | -    | -    | -    | -    | -    | -    |
| SRPX    | rs35318931 | C/T | CDS      | Y | 100 | 100 | 0.00 | 0.00 | -    | -    | -    | -    | -    |
| SS18    | rs994729   | A/G | Promoter | Y | 100 | 100 | 0.00 | 0.00 | -    | -    | -    | -    | -    |
| SS18L1  | rs3746651  | C/T | 5'UTR    | N | -   | -   | -    | -    | -    | -    | -    | -    | -    |
| SST     | rs4988514  | C/T | 3'UTR    | Y | 100 | 100 | 0.04 | 0.04 | 0.85 | -    | -    | -    | -    |
|         | rs7624906  | C/T | Promoter | Y | 100 | 100 | 0.03 | 0.04 | 0.30 | -    | -    | -    | -    |
| ST20    | rs12439318 | G/C | IVS      | N | -   | -   | -    | -    | -    | -    | -    | -    | -    |
| STAT2   | rs11575217 | G/T | Promoter | Y | 100 | 99  | 0.00 | 0.00 | -    | -    | -    | -    | -    |
|         | rs11575229 | A/G | IVS      | Y | 99  | 97  | 0.04 | 0.03 | 0.45 | -    | -    | -    | -    |
|         | rs2066807  | C/G | CDS      | Y | 100 | 100 | 0.05 | 0.03 | 0.43 | -    | -    | -    | -    |
|         | rs4996382  | A/G | Promoter | Y | 0   | 0   | -    | -    | -    | -    | -    | -    | -    |
| STAT5B  | rs4029774  | G/A | Promoter | N | -   | -   | -    | -    | -    | -    | -    | -    | -    |
| STC1    | rs2936     | A/G | 3'UTR    | Y | 99  | 100 | 0.13 | 0.12 | 0.68 | 0.62 | 0.37 | 0.35 | 0.28 |
| STIL    | rs3125630  | A/G | CDS      | N | -   | -   | -    | -    | -    | -    | -    | -    | -    |
|         | rs3125632  | A/G | Promoter | N | -   | -   | -    | -    | -    | -    | -    | -    | -    |
| SULT1A1 | rs1042157  | C/T | 3'UTR    | Y | 97  | 97  | 0.23 | 0.20 | 0.00 | -    | -    | -    | -    |







|         |            |     |          |   |     |     |      |      |      |      |      |      |      |   |
|---------|------------|-----|----------|---|-----|-----|------|------|------|------|------|------|------|---|
|         | rs3763869  | G/A | Promoter | N | -   | -   | -    | -    | -    | -    | -    | -    | -    | - |
|         | rs3763872  | G/A | Promoter | Y | 100 | 100 | 0.23 | 0.23 | 0.95 | 0.35 | 0.17 | 0.74 | 0.83 |   |
| WHSC1L1 | rs12678205 | G/A | Promoter | N | -   | -   | -    | -    | -    | -    | -    | -    | -    | - |
| WNT10B  | rs833840   | C/G | Promoter | Y | 90  | 95  | 0.47 | 0.49 | 0.71 | -    | -    | -    | -    | - |
| WNT2B   | None       | -   | -        | - | -   | -   | -    | -    | -    | -    | -    | -    | -    | - |
| WNT5A   | rs506611   | C/G | Promoter | N | -   | -   | -    | -    | -    | -    | -    | -    | -    | - |
| WNT8B   | rs3793772  | A/G | 5'UTR    | Y | 100 | 100 | 0.14 | 0.18 | 0.15 | 0.03 | 0.01 | 0.19 | 0.01 |   |
|         | rs4919465  | C/T | Promoter | Y | 98  | 96  | 0.15 | 0.18 | 0.26 | 0.09 | 0.03 | 0.33 | 0.03 |   |
| WRN     | rs7017069  | C/G | 5'UTR    | N | -   | -   | -    | -    | -    | -    | -    | -    | -    | - |
|         | rs11574158 | G/A | Promoter | N | -   | -   | -    | -    | -    | -    | -    | -    | -    | - |
|         | rs1346044  | C/T | CDS      | N | -   | -   | -    | -    | -    | -    | -    | -    | -    | - |
|         | rs1801195  | G/T | IVS      | Y | 100 | 99  | 0.39 | 0.38 | 0.86 | 0.80 | 0.56 | 0.69 | 0.56 |   |
|         | rs7016874  | G/A | IVS      | N | -   | -   | -    | -    | -    | -    | -    | -    | -    | - |
|         | rs2725362  | G/A | CDS      | N | -   | -   | -    | -    | -    | -    | -    | -    | -    | - |
| XDH     | rs34929837 | A/T | CDS      | Y | 93  | 95  | 0.00 | 0.00 | -    | -    | -    | -    | -    | - |
|         | rs206812   | G/A | Promoter | N | -   | -   | -    | -    | -    | -    | -    | -    | -    | - |
| YES1    | rs9945303  | A/G | Promoter | N | -   | -   | -    | -    | -    | -    | -    | -    | -    | - |
|         | rs4121508  | G/A | Promoter | N | -   | -   | -    | -    | -    | -    | -    | -    | -    | - |
|         | rs7233932  | C/G | Promoter | Y | 88  | 84  | 0.34 | 0.38 | 0.36 | -    | -    | -    | -    | - |
|         | rs9945495  | A/T | Promoter | Y | 100 | 100 | 0.11 | 0.10 | 0.62 | 0.84 | 0.65 | 0.78 | 0.63 |   |
| YWHAB   | rs3208334  | A/G | 3'UTR    | N | -   | -   | -    | -    | -    | -    | -    | -    | -    | - |
|         | rs6876     | C/T | 3'UTR    | Y | 100 | 100 | 0.00 | 0.00 | -    | -    | -    | -    | -    | - |
| YWHAZ   | rs2290291  | G/A | Promoter | N | -   | -   | -    | -    | -    | -    | -    | -    | -    | - |
| ZFAND6  | rs939975   | G/A | IVS      | N | -   | -   | -    | -    | -    | -    | -    | -    | -    | - |
| ZMYND8  | rs2275801  | A/G | CDS      | Y | 100 | 99  | 0.21 | 0.21 | 0.01 | -    | -    | -    | -    | - |
|         | rs3827047  | G/T | CDS      | Y | 100 | 100 | 0.07 | 0.08 | 0.14 | 0.85 | 0.57 | 0.97 | 0.58 |   |
| ZNF10   | rs11147253 | C/T | IVS      | N | -   | -   | -    | -    | -    | -    | -    | -    | -    | - |
| ZNF278  | rs2269488  | G/C | Promoter | N | -   | -   | -    | -    | -    | -    | -    | -    | -    | - |
|         | rs4974694  | C/A | Promoter | N | -   | -   | -    | -    | -    | -    | -    | -    | -    | - |
|         | rs3762830  | C/G | Promoter | Y | 100 | 100 | 0.21 | 0.17 | 0.31 | 0.10 | 0.08 | 0.09 | 0.04 |   |
| ZNF331  | rs2708783  | C/A | Promoter | N | -   | -   | -    | -    | -    | -    | -    | -    | -    | - |
|         | rs1284518  | C/A | Promoter | N | -   | -   | -    | -    | -    | -    | -    | -    | -    | - |
|         | rs12978451 | A/C | Promoter | N | -   | -   | -    | -    | -    | -    | -    | -    | -    | - |
|         | rs8100455  | C/G | 5'UTR    | N | -   | -   | -    | -    | -    | -    | -    | -    | -    | - |
|         | rs11084261 | C/T | 5'UTR    | N | -   | -   | -    | -    | -    | -    | -    | -    | -    | - |
|         | rs8100247  | G/A | 5'UTR    | N | -   | -   | -    | -    | -    | -    | -    | -    | -    | - |
| ZNF9    | rs17207135 | C/T | Promoter | Y | 97  | 97  | 0.17 | 0.15 | 0.02 | -    | -    | -    | -    | - |
|         | rs1005126  | C/G | Promoter | N | -   | -   | -    | -    | -    | -    | -    | -    | -    | - |
|         | rs9468370  | C/T | Promoter | N | -   | -   | -    | -    | -    | -    | -    | -    | -    | - |
|         | rs1005127  | G/A | Promoter | N | -   | -   | -    | -    | -    | -    | -    | -    | -    | - |
|         | rs4357130  | G/T | Promoter | N | -   | -   | -    | -    | -    | -    | -    | -    | -    | - |

Abbreviations: ID no, identification number; SNP, Single nucleotide polymorphisms; CR, call rate; MAF, minor allele frequency; HWE, Hardy-Weinberg equilibrium

<sup>a</sup>Two-sided  $\chi^2$  test for genotype distributions between the cases and controls.

<sup>b</sup>Odds ratios (ORs), 95% confidence intervals (CIs) and P-values were calculated by unconditional logistic regression analysis, adjusted for age, sex, and smoking status.

<sup>c</sup>None : no functional SNP
